# Supplementary material for: Metabo-Endotypes of Asthma Reveal Clinically Important Differences in Lung Function: Discovery and validation in two TOPMed Cohorts
Source: Research Square preprint supplement (doi:10.21203/rs.3.rs-358819/v1), 2021-03-31
Supplement: Supplementary file 2 [file 409c2e4ca6a770b69bcd8744.xls]

## Sheet: eTable5
Metabolite	HMDB	Super Pathway	GACRS Coefficient	GACRS P-value	CAMP Coefficient	GACRS P-value	Meta-analyzed Coefficient	Meta-analyzed P-value
1,5-AG / 1-deoxyglucose	HMDB0062641	Carbohydrate	0.181626	0.0132526	0.264903	0.000450913	0.223264	2.89381e-05
3-Hydroxybutyric acid	HMDB0000357	Amino Acid	-0.469001	2.45478e-07	-0.552694	1.94552e-11	-0.510847	1.77141e-18
Uracil	HMDB0000300	Nucleotide	-0.347411	2.51457e-06	-0.271726	0.000126017	-0.309569	6.5165e-10
Xanthurenic acid	HMDB0000881	Amino Acid	0.336161	1.21847e-05	0.314728	1.36061e-05	0.325444	1.99822e-10
a-Ketoglutaric acid	HMDB0002467	Lipid	-0.297378	8.72335e-05	-0.248677	0.000533148	-0.273028	7.54019e-08
5-Oxo-ETE	HMDB0010217	Lipid	-0.407469	2.63964e-08	-0.247389	0.000322811	-0.327429	4.29826e-05
ATP	HMDB0000538	Energy	0.298331	8.22435e-05	0.35224	1.6779e-06	0.325285	3.99743e-10
Allantoin	HMDB0000462	Nucleotide	0.423376	3.65729e-08	0.605486	1.02426e-14	0.514431	1.60746e-08
Arachidonic acid	HMDB0001043	Lipid	-0.692011	3.31291e-15	-0.436084	1.93807e-08	-0.564048	1.04386e-05
Bilirubin	HMDB0000054	Cofactors and Vitamins	-0.517539	4.09819e-11	-0.440604	5.86282e-09	-0.479072	3.54604e-19
2-Aminoadipic acid	HMDB0000510	Amino Acid	0.21163	0.00389181	0.289633	4.63561e-05	0.250632	6.20302e-07
DHA	HMDB0062579	Lipid	-0.529751	4.58257e-12	-0.503961	3.33517e-11	-0.516856	6.74248e-22
DHAP/Glyceraldehyde-3-P	HMDB0001112	Carbohydrate	0.422331	3.20231e-08	0.319486	5.58393e-06	0.370908	5.47592e-13
Linoleic acid	HMDB0000673	Lipid	-0.435228	8.40251e-09	-0.364578	3.21258e-07	-0.399903	2.23325e-15
N-Acetyl-L-Glutamic acid	HMDB0001138	Amino Acid	0.497508	6.39205e-11	0.684974	1.497e-18	0.591241	2.83205e-10
2-ketoisovaleric acid KIV	HMDB0000019	Amino Acid	-0.380608	5.05818e-07	-0.288239	3.892e-05	-0.334424	1.47876e-11
N-Arachidonoyl Dopamine	KEGG C12271	Lipid	0.232072	0.00098811	0.161973	0.0200038	0.197022	6.28743e-05
N-Oleoyl Dopamine	CAS:105955-11-1	Lipid	0.23302	0.00105567	0.190265	0.00647249	0.211643	1.84126e-05
N-Oleoyl Taurine	CAS:52514-04-2	Amino Acid	-0.329079	6.68111e-06	-0.220002	0.00149188	-0.27454	4.80613e-07
Oleoyl Glycine	HMDB0013631	Amino Acid	-0.320446	1.28304e-05	-0.448083	6.66241e-10	-0.384265	1.73126e-09
Palmitic acid	HMDB0000220	Lipid	-0.233685	0.000972632	-0.224911	0.00116767	-0.229298	2.85431e-06
LPC(22:6)	HMDB0010404	Lipid	0.169204	0.0155045	0.221185	0.00141354	0.195194	6.7887e-05
LPE(18:2)	HMDB0011507	Lipid	0.748486	7.35114e-19	0.996169	8.46982e-29	0.872328	1.86913e-12
LPE(20:0)	HMDB0011481	Lipid	0.241406	0.000381437	0.247274	0.000601741	0.24434	1.63192e-06
LPE(22:0)	HMDB0011520	Lipid	0.286292	7.75592e-05	0.216188	0.00315562	0.25124	1.22281e-06
campesterol	HMDB0002869	Lipid	0.611873	1.2084e-14	0.49174	7.40567e-11	0.551806	4.05438e-20
SM(d18:1/14:0)	HMDB0012097	Lipid	0.454009	1.39589e-09	0.413162	3.50099e-08	0.433586	2.74696e-16
PC(30:1)	HMDB0007870	Lipid	0.560512	3.56017e-13	0.656841	5.33248e-17	0.608677	4.71933e-28
PS(P-36:2)/PS(O-36:3)		Lipid	0.338509	6.32418e-06	0.277652	8.71615e-05	0.308081	7.40235e-10
PC(34:4)	HMDB0007883	Lipid	0.57285	5.19948e-13	0.670393	8.58805e-17	0.621622	9.88372e-28
PC(30:0)	HMDB0007869	Lipid	0.569914	4.73182e-14	0.644138	9.38806e-17	0.607026	1.60319e-28
SM(d18:1/16:0)	HMDB0010169	Lipid	0.457027	2.9748e-09	0.29543	3.30053e-05	0.376228	3.21823e-06
PC(36:4)_A	HMDB0007983	Lipid	0.703698	8.37905e-17	0.925587	2.48027e-25	0.814642	2.09179e-13
Cer(d18:1/16:0)	HMDB0004949	Lipid	0.159872	0.0210169	0.261994	0.000218691	0.210933	3.61213e-05
PE(34:0)	HMDB0008925	Lipid	0.732193	1.47122e-20	0.546282	5.36885e-13	0.639238	6.12026e-12
PC(32:0)	HMDB0007871	Lipid	0.507018	1.63079e-11	0.360383	3.9771e-07	0.4337	3.31146e-09
DG(30:0)	HMDB0007011	Lipid	0.462679	1.37475e-08	0.42406	1.54395e-08	0.443369	6.06689e-17
PC(34:1)	HMDB0007972	Lipid	0.541087	1.02091e-12	0.547539	3.33431e-13	0.544313	1.38149e-24
PE(36:0)	HMDB0008991	Lipid	0.756476	8.76345e-21	0.507777	1.00861e-11	0.632127	3.706e-07
PC(40:6)	HMDB0008057	Lipid	0.261654	0.000321758	0.223147	0.00175855	0.242401	1.54196e-06
PE(P-36:3)/PE(O-36:4)	HMDB0011442	Lipid	0.461863	2.4449e-09	0.36118	1.2801e-06	0.411521	6.02751e-15
PC(36:2)	HMDB0008039	Lipid	0.734167	6.55261e-18	0.988859	3.37888e-27	0.861513	1.33166e-11
PE(38:4)	HMDB0009003	Lipid	0.266826	0.000178869	0.389649	9.56959e-08	0.328238	9.04728e-08
SM(d18:1/20:0)	HMDB0012102	Lipid	0.397126	1.26542e-07	0.307195	2.21328e-05	0.352161	6.08868e-12
PE(P-36:2)/PE(O-36:3)	HMDB0011441	Lipid	0.530062	1.5008e-11	0.520523	2.83451e-11	0.525292	2.14544e-21
DG(34:1)	HMDB0007102	Lipid	0.349536	3.9143e-06	0.447124	3.73609e-08	0.39833	4.12016e-12
PC(38:2)	HMDB0008270	Lipid	0.539779	2.10728e-12	0.652708	1.86366e-16	0.596243	4.58188e-26
PE(P-36:1)/PE(O-36:2)	HMDB0009082	Lipid	0.314782	6.89837e-06	0.398841	1.14183e-07	0.356811	1.96309e-11
DG(34:0)	HMDB0007100	Lipid	0.422333	5.70292e-09	0.558464	3.63268e-13	0.490398	5.81318e-13
SM(d18:1/22:0)	HMDB0012103	Lipid	0.386248	1.51301e-07	0.241505	0.00081108	0.313876	1.44438e-05
Cer(d18:1/22:0)	HMDB0004952	Lipid	0.436203	3.62186e-09	0.535645	7.50882e-13	0.485924	3.63093e-20
DG(36:0)	HMDB0007158	Lipid	0.230087	0.00041449	0.352391	5.59232e-07	0.291239	1.91189e-06
SM(d18:1/24:0)	HMDB0011697	Lipid	0.217046	0.00170714	0.209961	0.00353258	0.213504	2.72805e-05
Cer(d18:1/24:0)	HMDB0004956	Lipid	0.440246	3.62004e-09	0.47646	8.5257e-11	0.458353	1.03897e-18
TG(44:2)	HMDB0042279	Lipid	0.632194	2.09085e-15	1.01686	3.77446e-31	0.824525	1.81089e-05
TG(42:0)	HMDB0072780	Lipid	0.543446	7.70171e-13	0.81076	4.32148e-25	0.677103	4.06314e-07
TG(45:1)	HMDB0042099	Lipid	0.609525	1.65742e-15	0.941767	1.2419e-25	0.775646	3.02429e-06
TG(44:0)	HMDB0042063	Lipid	0.535302	4.21639e-12	0.843488	1.10645e-25	0.689395	7.68109e-06
TG(58:10)	HMDB0005476	Lipid	-0.203622	0.00341376	-0.309171	2.8844e-05	-0.256397	1.18361e-06
TG(49:2)	HMDB0011706	Lipid	0.697671	1.93308e-17	0.632411	3.21191e-15	0.665041	9.77061e-32
TG(48:1)	HMDB0005359	Lipid	0.604134	2.2314e-13	0.887893	1.91271e-24	0.746014	1.45573e-07
TG(51:3)	HMDB0011701	Lipid	0.673319	3.80006e-15	0.620135	1.46496e-13	0.646727	1.15722e-27
TG(49:1)	HMDB0011705	Lipid	0.738158	1.78196e-19	0.888632	4.59623e-25	0.813395	3.04834e-27
TG(48:0)	HMDB0005356	Lipid	0.497638	3.04387e-10	0.704552	8.13085e-19	0.601095	6.24342e-09
TG(51:2)	HMDB0005362	Lipid	0.725294	8.8161e-19	0.817297	3.40808e-22	0.771295	3.08561e-38
TG(53:3)	HMDB0043058	Lipid	0.422567	3.15784e-08	0.275859	0.000132878	0.349213	1.92958e-06
TG(49:0)	HMDB0042095	Lipid	0.744755	1.70882e-18	0.885679	3.37911e-26	0.815217	5.88001e-31
TG(52:2)	HMDB0005369	Lipid	0.513834	9.55852e-10	0.717696	1.60703e-17	0.615765	1.53184e-09
TG(56:4)	HMDB0005398	Lipid	0.214978	0.00274329	0.358637	7.22459e-07	0.286807	6.52747e-05
TG(54:2)	HMDB0005403	Lipid	0.770047	1.98349e-19	0.947983	2.01403e-28	0.859015	4.66764e-22
TG(52:0)	HMDB0005365	Lipid	0.784472	1.66469e-20	1.04062	4.7988e-34	0.912547	1.04005e-12
TG(56:1)	HMDB0005396	Lipid	0.660147	1.57641e-17	1.03714	9.36496e-31	0.848644	6.7263e-06
TG(56:2)	HMDB0005404	Lipid	0.650843	3.16175e-17	0.957952	6.17548e-29	0.804398	1.61874e-07
TG(54:1)	HMDB0005395	Lipid	0.789464	3.61812e-21	1.04319	9.39731e-33	0.916327	5.0854e-13
TG(56:3)	HMDB0005410	Lipid	0.551811	2.48023e-13	0.801218	3.46413e-22	0.676514	5.79636e-08
TG(51:0)	HMDB0031106	Lipid	0.683778	1.51963e-17	0.748091	1.11728e-20	0.715935	1.64402e-36
TG(55:3)	HMDB0042466	Lipid	0.595705	4.95382e-14	0.495446	2.74588e-10	0.545576	8.32362e-23
TG(52:1)	HMDB0005367	Lipid	0.765673	1.3331e-17	1.11792	1.28759e-31	0.941798	8.92696e-08
TG(53:2)	HMDB0042196	Lipid	0.738732	2.86803e-18	0.601639	1.12438e-14	0.670186	1.41232e-22
TG(50:0)	HMDB0005357	Lipid	0.666306	2.91537e-15	0.90532	9.67482e-28	0.785813	4.85051e-11
TG(54:3)	HMDB0005405	Lipid	0.545799	8.335e-12	0.636038	1.73908e-16	0.590919	2.62294e-27
TG(51:1)	HMDB0042104	Lipid	0.673352	4.92959e-17	0.681823	6.73397e-18	0.677588	8.91859e-34
TG(50:1)	HMDB0005360	Lipid	0.522764	2.23861e-10	0.850074	1.36686e-22	0.686419	2.73707e-05
TG(54:4)	HMDB0005370	Lipid	0.240579	0.000780487	0.394763	4.79459e-08	0.317671	3.77745e-05
TG(52:3)	HMDB0005384	Lipid	0.397454	1.07954e-06	0.560187	1.96044e-12	0.47882	3.98741e-09
TG(50:2)	HMDB0005377	Lipid	0.487247	4.04953e-09	0.764661	2.87251e-19	0.625954	6.39837e-06
TG(47:0)	HMDB0042094	Lipid	0.665539	1.62608e-17	0.817574	2.91365e-24	0.741557	1.75507e-22
TG(46:0)	HMDB0010411	Lipid	0.592234	5.87196e-13	0.766852	1.35819e-20	0.679543	7.07307e-15
TG(50:3)	HMDB0005433	Lipid	0.575146	1.13939e-10	0.722576	1.36954e-16	0.648861	1.33989e-18
TG(47:1)	HMDB0042100	Lipid	0.647733	1.15121e-15	0.75881	1.28538e-18	0.703272	7.97298e-31
TG(48:2)	HMDB0005376	Lipid	0.672952	5.55358e-15	0.893685	4.19932e-24	0.783319	1.27111e-12
TG(45:0)	HMDB0042093	Lipid	0.557072	8.00217e-13	0.595932	6.77266e-15	0.576502	1.64021e-26
TG(49:3)	HMDB0042103	Lipid	0.83226	3.88615e-21	0.825344	1.00888e-20	0.828802	4.10157e-40
TG(46:1)	HMDB0010412	Lipid	0.589056	3.21636e-13	0.917026	1.2911e-26	0.753041	4.38763e-06
TG(47:2)	HMDB0042076	Lipid	0.73014	2.6072e-19	0.976213	5.63791e-27	0.853177	4.08161e-12
TG(54:8)	HMDB0010518	Lipid	0.196638	0.00733905	0.236243	0.00126359	0.21644	2.94853e-05
TG(43:0)	HMDB0042062	Lipid	0.542378	1.47768e-13	0.788137	1.19475e-22	0.665258	6.16667e-08
TG(44:1)	HMDB0042301	Lipid	0.626904	4.06787e-15	0.974316	2.26227e-29	0.80061	4.04627e-06
TG(52:7)	HMDB0010517	Lipid	0.355513	3.51918e-06	0.511628	3.19339e-11	0.433571	2.78418e-08
TG(43:1)	HMDB0042098	Lipid	0.641348	2.22376e-16	1.01741	2.66275e-28	0.82938	1.02962e-05
TG(41:0)		Lipid	0.600649	1.88942e-14	0.818432	1.97611e-24	0.70954	7.21854e-11
TG(45:3)		Lipid	0.742446	2.41616e-17	1.06355	3.68109e-31	0.902997	1.86196e-08
TG(43:2)	HMDB0043169	Lipid	0.730117	9.789e-17	1.04647	1.14928e-30	0.888294	1.95657e-08
Cer(d18:1/24:1)	HMDB0004953	Lipid	0.407324	3.29872e-08	0.410423	1.61966e-08	0.408873	1.75044e-15
DG(36:1)	HMDB0007216	Lipid	0.577696	2.68146e-13	0.778339	3.967e-19	0.678018	1.39464e-11
DG(36:2)	HMDB0007218	Lipid	0.514047	4.78041e-11	0.559871	2.56986e-12	0.536959	2.23172e-21
PE(P-38:4)/PE(O-38:5)	HMDB0011386	Lipid	0.232238	0.000979847	0.206368	0.00408541	0.219303	1.59291e-05
PC(36:1)	HMDB0008038	Lipid	0.571507	1.15379e-14	0.695451	2.12261e-18	0.633479	1.58128e-24
DG(32:0)	HMDB0007098	Lipid	0.379685	4.56635e-07	0.399406	1.67641e-07	0.389545	5.33168e-13
DG(36:3)	HMDB0007219	Lipid	0.290963	8.43858e-05	0.174668	0.0135779	0.232815	6.23105e-05
PC(34:0)	HMDB0007970	Lipid	0.492418	3.86323e-11	0.511605	7.87923e-12	0.502011	2.24829e-21
PC(P-34:0)/PC(O-34:1)	HMDB0011208	Lipid	0.43172	1.4172e-08	0.269114	0.000201367	0.350417	1.63236e-05
DG(32:1)	HMDB0007099	Lipid	0.435596	8.95249e-08	0.512875	4.80684e-11	0.474236	7.95301e-18
PE(P-34:2)/PE(O-34:3)	HMDB0011343	Lipid	0.267715	0.000227526	0.358736	1.25499e-06	0.313226	2.16688e-09
PE(38:2)	HMDB0008942	Lipid	0.85206	4.36788e-23	0.712062	4.63818e-18	0.782061	5.56271e-29
PE(38:5)	HMDB0009069	Lipid	0.539674	1.56363e-12	0.59795	1.3716e-14	0.568812	3.87243e-25
PC(34:2)	HMDB0007973	Lipid	0.677107	1.67881e-16	0.888319	3.15312e-25	0.782713	1.24745e-13
PE(38:6)	HMDB0009102	Lipid	0.24544	0.000617658	0.254294	0.000332695	0.249867	6.15007e-07
PC(38:6)	HMDB0007991	Lipid	0.227991	0.00127106	0.183661	0.00863871	0.205826	3.15529e-05
PE(P-44:12)/PE(O-44:13)		Lipid	0.644832	5.56715e-14	0.893522	5.41398e-22	0.769177	6.17746e-10
PS(34:0)	HMDB0012356	Lipid	0.542345	4.46403e-12	0.595295	2.48945e-14	0.56882	7.02216e-25
PC(32:2)	HMDB0007874	Lipid	0.584716	1.00835e-13	0.730576	6.4253e-19	0.657646	1.92439e-19
PE(32:0)	HMDB0008923	Lipid	0.672968	7.45797e-17	0.62506	7.09559e-15	0.649014	3.02e-30
PC(36:4-OH)		Lipid	0.357782	7.49955e-07	0.342971	2.46347e-06	0.350376	1.00071e-11
cholesterol	HMDB0000067	Lipid	0.624712	3.18283e-15	0.478716	9.5508e-11	0.551714	4.09575e-14
LPE(18:1)	HMDB0011506	Lipid	0.6489	2.64494e-16	0.953939	3.19077e-28	0.80142	1.48401e-07
LPE(20:4)	HMDB0011517	Lipid	0.602114	2.74953e-14	0.620196	1.89531e-15	0.611155	1.63434e-28
LPC(18:2)	HMDB0010386	Lipid	0.533322	1.17375e-11	0.733611	1.86353e-19	0.633467	2.52376e-10
LPC(16:1)	HMDB0010383	Lipid	0.361001	6.20169e-07	0.523524	2.06936e-11	0.442263	5.25523e-08
LPC(18:1)	HMDB0002815	Lipid	0.429629	5.80658e-09	0.514846	4.18601e-11	0.472238	1.14944e-17
LPC(20:5)	HMDB0010397	Lipid	0.240754	0.000707279	0.372612	7.03929e-07	0.306683	3.29176e-06
PC(34:3)	HMDB0008006	Lipid	0.758893	3.59665e-20	0.805065	4.17463e-22	0.781979	3.07234e-40
PC(36:3)	HMDB0008105	Lipid	0.920434	4.38327e-24	0.881113	1.52085e-24	0.900774	1.85702e-49
PC(36:0)	HMDB0008036	Lipid	0.409555	1.63143e-08	0.40892	1.9435e-08	0.409238	1.86891e-15
PC(P-34:2)/PC(O-34:3)	HMDB0011211	Lipid	0.274987	0.00018302	0.212391	0.00308621	0.243689	1.57608e-06
SM(d18:1/16:1)	HMDB0029216	Lipid	0.431422	1.58282e-08	0.318725	1.95868e-05	0.375074	2.80784e-11
TG(52:5)	HMDB0005380	Lipid	0.17212	0.0197321	0.235525	0.000895177	0.203822	4.80118e-05
PC(P-34:1)/PC(O-34:2)	HMDB0011210	Lipid	0.361167	1.48354e-06	0.260978	0.000306315	0.311072	1.16419e-09
TG(50:4)	HMDB0005435	Lipid	0.542712	2.74824e-10	0.822299	2.0339e-20	0.682506	1.04892e-06
TG(52:6)	HMDB0005436	Lipid	0.297188	9.99407e-05	0.474606	4.51292e-10	0.385897	1.36051e-05
TG(48:3)	HMDB0005432	Lipid	0.657053	2.20814e-14	1.00399	3.4579e-28	0.830521	1.68668e-06
TG(55:2)	HMDB0042226	Lipid	0.896293	4.64767e-26	1.0869	1.67634e-31	0.991598	2.36631e-25
PC(32:1)	HMDB0007873	Lipid	0.481136	1.94674e-10	0.593938	1.69864e-14	0.537537	1.56369e-21
PC(36:4)_B	HMDB0008138	Lipid	0.256737	0.000451418	0.245797	0.000878998	0.251267	1.51476e-06
glycoursodeoxycholate	HMDB0000708	Lipid	0.418075	3.47578e-08	0.510722	1.14792e-11	0.464398	2.61069e-18
taurochenodeoxycholate	HMDB0000951	Lipid	0.446649	7.06384e-09	0.723767	2.25219e-19	0.585208	2.40499e-05
cholate	HMDB0000619	Lipid	0.220445	0.00145963	0.301563	1.71192e-05	0.261004	1.42026e-07
glycochenodeoxycholate	HMDB0000637	Lipid	0.579352	2.02174e-11	0.924584	2.27201e-23	0.751968	1.32277e-05
glycodeoxycholate	HMDB0000631	Lipid	0.499256	2.36304e-09	0.523475	1.42272e-10	0.511365	7.99021e-19
9.10-diHOME	HMDB0004704	Lipid	0.602556	4.44119e-14	0.588405	1.04458e-14	0.595481	1.78084e-28
chenodeoxycholate	HMDB0000518	Lipid	0.196681	0.004388	0.217696	0.00172996	0.207189	2.47625e-05
deoxycholate	HMDB0000626	Lipid	0.233481	0.00199479	0.172094	0.0159887	0.202787	5.95091e-05
glycolithocholate	HMDB0000698	Lipid	0.524127	1.18256e-09	0.669101	4.49465e-16	0.596614	1.86218e-16
caprate	HMDB0000511	Lipid	0.282516	3.80034e-05	0.213963	0.00189571	0.248239	3.46203e-07
5-dodecenoate	HMDB0000529	Lipid	-0.359394	1.11519e-06	-0.558059	9.80027e-14	-0.458727	3.87295e-06
eicosapentaenoate	HMDB0001999	Lipid	-0.403547	1.52947e-07	-0.343828	3.81329e-06	-0.373688	1.22e-12
alpha-linolenate	HMDB0001388	Lipid	-0.337706	3.76208e-06	-0.340201	1.65893e-06	-0.338954	1.47072e-11
docosahexaenoate	HMDB0002183	Lipid	-0.459278	8.35018e-10	-0.558105	3.5388e-13	-0.508691	6.99772e-21
arachidonate	HMDB0001043	Lipid	-0.633303	2.87213e-14	-0.635799	2.21849e-14	-0.634551	4.29982e-27
docosapentaenoate	HMDB0001976	Lipid	-0.521179	1.11762e-11	-0.667466	6.08109e-17	-0.594322	4.4569e-16
linoleate	HMDB0000673	Lipid	-0.314435	1.64842e-05	-0.412136	8.63301e-09	-0.363286	7.23767e-13
eicosatrienoate	HMDB0002925	Lipid	-0.35933	8.71877e-07	-0.497513	5.04169e-11	-0.428421	5.61817e-10
adrenate	HMDB0002226	Lipid	-0.710407	1.22123e-18	-0.717888	4.07211e-18	-0.714147	2.85729e-34
eicosadienoate	HMDB0005060	Lipid	-0.643519	7.15204e-16	-0.590093	9.06999e-15	-0.616806	2.12549e-30
nervonic acid	HMDB0002368	Lipid	-0.253804	0.00039469	-0.287365	4.81506e-05	-0.270584	6.2215e-08
13-HODE	HMDB0004667	Lipid	0.409555	1.63143e-08	0.40892	1.9435e-08	0.409238	1.86891e-15
11-HDoHE	HMDB0060040	Lipid	0.274987	0.00018302	0.212391	0.00308621	0.243689	1.57608e-06
2-hydroxyoctanoate	HMDB0000711	Lipid	0.334452	2.24297e-06	0.346241	9.1409e-07	0.340347	8.81836e-12
indoleacetate	HMDB0000197	Amino Acid	0.431422	1.58282e-08	0.318725	1.95868e-05	0.375074	2.80784e-11
heptadecanoate	HMDB0002259	Lipid	0.17212	0.0197321	0.235525	0.000895177	0.203822	4.80118e-05
stearate	HMDB0000827	Lipid	0.361167	1.48354e-06	0.260978	0.000306315	0.311072	1.16419e-09
13-docosenoate	HMDB0002068	Lipid	0.542712	2.74824e-10	0.822299	2.0339e-20	0.682506	1.04892e-06
eicosanedioate		Lipid	0.297188	9.99407e-05	0.474606	4.51292e-10	0.385897	1.36051e-05
taurohyodeoxycholate/tauroursodeoxycholate	HMDB0000874	Lipid	0.657053	2.20814e-14	1.00399	3.4579e-28	0.830521	1.68668e-06
tauro-alpha-muricholate/tauro-beta-muricholate	HMDB0000932	Lipid	0.896293	4.64767e-26	1.0869	1.67634e-31	0.991598	2.36631e-25
taurocholate	HMDB0000036	Lipid	0.481136	1.94674e-10	0.593938	1.69864e-14	0.537537	1.56369e-21
salicylate	HMDB0001895	Xenobiotics	0.256737	0.000451418	0.245797	0.000878998	0.251267	1.51476e-06
furoylglycine	HMDB0000439	Xenobiotics	0.262505	0.000182566	0.202029	0.00293887	0.232267	1.32834e-06
palmitoylethanolamide	HMDB0002100	Lipid	-0.323833	7.75542e-06	-0.31064	2.20728e-05	-0.317237	8.91797e-10
p-hydroxyphenylacetate	HMDB0000020	Amino Acid	0.303156	4.26546e-06	0.407465	2.20131e-08	0.35531	9.58126e-12
4-acetamidobutanoate	HMDB0003681	Amino Acid	0.279344	0.000130339	0.349404	1.02273e-06	0.314374	5.01491e-10
2-aminohippuric acid	HMDB0001867	Amino Acid	0.161219	0.0179008	0.243529	0.000753176	0.202374	7.49966e-05
acetaminophen	HMDB0001859	Xenobiotics	-0.267944	0.00341869	-0.172932	0.0157215	-0.220438	1.33608e-05
linoleoyl ethanolamide	HMDB0012252	Lipid	-0.38025	3.27248e-07	-0.281213	0.000110349	-0.330732	1.26652e-10
Cer(d18:1/24:1)	HMDB0004953	Lipid	0.242705	0.000764293	0.283843	5.4566e-05	0.263274	1.203e-07
Cer(d18:1/16:0)	HMDB0004949	Lipid	0.191584	0.00661098	0.281599	6.33721e-05	0.236591	2.00818e-06
metronidazole	HMDB0015052	Xenobiotics	0.703698	8.37905e-17	0.925587	2.48027e-25	0.814642	2.09179e-13
N-acetyltryptophan	HMDB0013713	Amino Acid	0.159872	0.0210169	0.261994	0.000218691	0.210933	3.61213e-05
glycodeoxycholate/glycochenodeoxycholate	HMDB0000631	Lipid	0.664268	3.41573e-13	0.973909	3.78822e-23	0.819088	1.21937e-07
PE(38:4)	HMDB0009003	Lipid	0.297422	4.67418e-05	0.391702	8.49351e-08	0.344562	2.67658e-11
PE(38:6)	HMDB0009102	Lipid	0.190683	0.00798786	0.21408	0.00219068	0.202381	4.21924e-05
PE(36:4)	HMDB0008937	Lipid	0.393162	7.60535e-08	0.640966	1.99462e-16	0.517064	3.00394e-05
PE(34:2)	HMDB0008928	Lipid	0.571012	2.3505e-13	0.92802	6.36992e-27	0.749516	2.6824e-05
LPE(18:1)	HMDB0011506	Lipid	0.691582	6.94156e-18	0.948605	4.35092e-28	0.820094	1.75375e-10
LPE(18:2)	HMDB0011507	Lipid	0.762794	1.43689e-19	0.978601	2.47312e-28	0.870698	7.07566e-16
C18:1 carnitine	HMDB0005065	Lipid	-0.240129	0.000989455	-0.333616	2.59713e-06	-0.286872	1.09098e-08
PC(36:2)	HMDB0008039	Lipid	0.520527	1.15455e-11	0.55706	1.33898e-12	0.538794	3.06616e-22
C16 carnitine	HMDB0000222	Lipid	-0.362781	4.37493e-06	-0.520889	1.39352e-11	-0.441835	2.28362e-08
PC(30:0)	HMDB0007869	Lipid	0.592739	4.96305e-15	0.628035	2.66243e-16	0.610387	2.21834e-29
methionine	HMDB0000696	Amino Acid	0.485441	1.06338e-10	0.471238	1.42477e-09	0.478339	3.66472e-18
SM(d18:1/14:0)	HMDB0012097	Lipid	0.479014	1.75434e-10	0.421117	1.82701e-08	0.450066	1.80392e-17
LPC(24:0)	HMDB0010405	Lipid	0.294383	0.000100423	0.351884	2.5421e-06	0.323134	9.97129e-10
LPC(22:6)	HMDB0010404	Lipid	0.650843	3.16175e-17	0.957952	6.17548e-29	0.804398	1.61874e-07
LPC(20:4)	HMDB0010395	Lipid	0.789464	3.61812e-21	1.04319	9.39731e-33	0.916327	5.0854e-13
LPE(20:0)	HMDB0011511	Lipid	0.416784	1.98659e-08	0.348497	2.19988e-06	0.38264	1.96691e-13
LPC(20:5)	HMDB0010397	Lipid	1.06974	7.20508e-30	0.665936	3.91656e-17	0.867836	1.72081e-05
1-methylnicotinamide	HMDB0000699	Cofactors and Vitamins	0.487247	4.04953e-09	0.764661	2.87251e-19	0.625954	6.39837e-06
choline	HMDB0000097	Lipid	0.299757	2.33441e-05	0.288176	4.35994e-05	0.293966	3.70649e-09
creatine	HMDB0000064	Amino Acid	0.325956	1.89279e-05	0.212752	0.00371221	0.269354	1.94782e-06
citrulline	HMDB0000904	Amino Acid	0.330965	7.59604e-06	0.258202	0.000439923	0.294583	1.41783e-08
carnitine	HMDB0000062	Lipid	0.184556	0.0110102	0.245124	0.000692697	0.21484	2.61165e-05
cystine	HMDB0000192	Amino Acid	0.626904	4.06787e-15	0.974316	2.26227e-29	0.80061	4.04627e-06
histidine	HMDB0000177	Amino Acid	0.357543	5.27006e-07	0.346608	1.58755e-06	0.352076	5.38101e-12
ornithine	HMDB0000214	Amino Acid	0.424743	9.22292e-09	0.443867	1.58121e-09	0.434305	6.70556e-17
N1-acetylspermidine	HMDB0001276	Imidic Acid	-0.279314	0.000155415	-0.287053	5.24586e-05	-0.283183	1.67566e-08
anserine	HMDB0000194	Peptide	0.411538	2.32379e-08	0.423106	1.63431e-08	0.417322	3.36253e-15
lysine	HMDB0000182	Amino Acid	0.311129	2.33427e-05	0.331202	3.62134e-06	0.321166	2.1234e-10
NMMA	HMDB0029416	Amino Acid	0.383501	1.24466e-07	0.343809	3.29854e-06	0.363655	3.46028e-12
C4-OH carnitine	HMDB0013127	Lipid	-0.259535	0.000526864	-0.41346	1.85956e-08	-0.336498	1.22983e-05
N6-acetyllysine	HMDB0000206	Amino Acid	0.343045	1.13176e-06	0.494586	2.92892e-11	0.418816	3.24973e-08
N-acetylhistidine	HMDB0032055	Amino Acid	0.292201	7.04695e-05	0.238482	0.00100703	0.265341	2.28506e-07
C3 carnitine	HMDB0000824	Lipid	0.579411	4.07996e-14	0.539117	1.2975e-12	0.559264	2.2752e-25
N-alpha-acetylarginine	HMDB0004620	Amino Acid	0.288593	0.000108653	0.264559	0.000160301	0.276576	2.39857e-08
proline	HMDB0000162	Amino Acid	0.622277	5.67722e-16	0.679496	2.49451e-18	0.650887	2.74961e-32
glutamine	HMDB0000641	Amino Acid	0.307898	6.99998e-05	0.235328	0.0016987	0.271613	3.01158e-07
LPC(16:1)	HMDB0010383	Lipid	0.602428	6.44908e-15	0.446295	1.77489e-09	0.524361	1.8571e-11
LPC(16:0)	HMDB0010382	Lipid	0.350285	1.04423e-06	0.460173	6.46269e-10	0.405229	1.63928e-13
alanine	HMDB0000161	Amino Acid	0.496834	1.38087e-10	0.651988	6.15038e-17	0.574411	1.31748e-13
C5 carnitine	HMDB0000688	Amino Acid	0.337389	5.45833e-06	0.305384	1.92849e-05	0.321386	2.02266e-10
LPC(22:5)	HMDB0010403	Lipid	0.279697	0.00010292	0.328198	4.003e-06	0.303947	1.54684e-09
LPC(22:4)	HMDB0010401	Lipid	0.241663	0.000767658	0.344309	2.28764e-06	0.292986	1.28872e-08
threonine	HMDB0000167	Amino Acid	0.276556	0.00015554	0.280209	6.59594e-05	0.278383	2.06447e-08
SM(d18:1/20:0)	HMDB0012102	Lipid	0.315382	2.46984e-05	0.19048	0.00716474	0.252931	5.12028e-05
C14:2 carnitine	HMDB0013331	Lipid	-0.414291	3.53613e-08	-0.626829	3.72459e-16	-0.52056	9.65607e-07
PS(P-36:1)/PS(O-36:2)		Lipid	0.275455	0.000158877	0.259545	0.000285205	0.2675	1.23272e-07
PS(P-36:2)/PS(O-36:3)		Lipid	0.37855	9.45125e-07	0.392622	8.90922e-08	0.385586	1.10899e-13
PE(34:0)	HMDB0008925	Lipid	0.752176	1.51626e-19	0.47882	1.82646e-10	0.615498	6.69206e-06
PC(32:2)	HMDB0007874	Lipid	0.524727	1.87908e-11	0.575746	1.27148e-13	0.550236	1.32537e-23
C18:2 carnitine	HMDB0006469	Lipid	-0.334769	5.4171e-06	-0.309369	1.0665e-05	-0.322069	9.00722e-11
LPE(20:4)	HMDB0011517	Lipid	0.668475	6.09763e-17	0.665886	2.65342e-17	0.667181	4.06891e-33
PE(36:2)	HMDB0008994	Lipid	0.699171	1.23721e-17	1.15558	1.87507e-33	0.927378	4.82874e-05
PE(40:6)	HMDB0009012	Lipid	0.294031	0.00012042	0.294332	3.80839e-05	0.294181	5.81825e-09
glycocholate	HMDB0000138	Lipid	0.491942	3.48257e-09	0.827073	9.97586e-20	0.659508	8.29124e-05
kynurenic acid	HMDB0000715	Amino Acid	0.231175	0.00132004	0.267882	0.000135947	0.249528	5.00461e-07
PC(P-38:5)/PC(O-38:6)	HMDB0011319	Lipid	0.334452	2.24297e-06	0.346241	9.1409e-07	0.340347	8.81836e-12
cortisol	HMDB0000063	Lipid	0.431422	1.58282e-08	0.318725	1.95868e-05	0.375074	2.80784e-11
guanidinoacetic acid	HMDB0000128	Amino Acid	0.17212	0.0197321	0.235525	0.000895177	0.203822	4.80118e-05
homoarginine	HMDB0000670	Amino Acid	0.361167	1.48354e-06	0.260978	0.000306315	0.311072	1.16419e-09
N-carbamoyl-beta-alanine	HMDB0000026	Nucleotide	0.542712	2.74824e-10	0.822299	2.0339e-20	0.682506	1.04892e-06
phenylalanine	HMDB0000159	Amino Acid	0.297188	9.99407e-05	0.474606	4.51292e-10	0.385897	1.36051e-05
SDMA	HMDB0003334	Amino Acid	0.657053	2.20814e-14	1.00399	3.4579e-28	0.830521	1.68668e-06
tryptophan	HMDB0000929	Amino Acid	0.896293	4.64767e-26	1.0869	1.67634e-31	0.991598	2.36631e-25
tyrosine	HMDB0000158	Amino Acid	0.481136	1.94674e-10	0.593938	1.69864e-14	0.537537	1.56369e-21
valine	HMDB0000883	Amino Acid	0.256737	0.000451418	0.245797	0.000878998	0.251267	1.51476e-06
LPC(18:2)	HMDB0010386	Lipid	0.750118	6.12142e-19	0.703413	3.38579e-18	0.726766	5.28319e-37
SM(d18:1/22:0)	HMDB0012103	Lipid	0.256923	0.000472818	0.158413	0.025197	0.207668	3.32795e-05
