# Supplementary material for: Metabo-Endotypes of Asthma Reveal Clinically Important Differences in Lung Function: Discovery and validation in two TOPMed Cohorts
Source: Research Square preprint supplement (doi:10.21203/rs.3.rs-358819/v1), 2021-03-31
Supplement: Supplementary file 2 [file d790f62d16e6223d8a2de53b.docx]

**ONLINE ONLY MATERIAL**

**Metabo-Endotypes of Asthma Reveal Clinically Important Differences in Lung Function: Discovery and validation in two TOPMed Cohorts**

Rachel S. Kelly, Kevin Mendez, Mengna Huang, Brian D. Hobbs, Clary B. Clish, Robert Gerszten, Michael H. Cho, Craig E. Wheelock, Michael J. McGeachie PhD, Su H. Chu, Juan C. Celedón, Scott T. Weiss, Jessica Lasky-Su

**eMETHODS**

***Study populations***

*Discovery population:*

*The Genetics of Asthma in Costa Rica Study (GACRS)*

GACRS 1 recruited 1,165 children with asthma, aged 6-14 years, from 140 school across the Central Valley of Costa Rica between February 2001 and August 2008. Children were eligible for the study if they had asthma, as defined by physician-diagnosis and ≥2 respiratory symptoms or asthma attacks in the prior year, and a high probability of having ≥6 great-grandparents born in the Central Valley of Costa Rica 1. At enrollment, all children completed a protocol including spirometry, questionnaires, and collection of blood samples. The questionnaire was a version of the one used in the Collaborative Study on the Genetics of Asthma translated into Spanish 2, and included information on medication use, hospitalizations, and physician’s diagnoses of hayfever and eczema/atopic dermatitis. Spirometry was conducted with a Survey Tach Spirometer (Warren E. Collins; Braintree, MA) in accordance with American Thoracic Society recommendations 1.

Serum total IgE level was determined using the UniCAP 250 system (Pharmacia & Upjohn, Kalamazoo, Mich), with samples measured in duplicate 3. Serum levels of 25–hydroxyvitamin D3 were obtained using a radioimmunoassay method 4. Written parental and participating child consent was obtained. The study was approved by the Partners Human Research Committee at Brigham and Women’s Hospital (Boston, USA); Protocol#: 2000-P-001130/55, and the Hospital Nacional de Niños (San José, Costa Rica). All children who had available plasma samples with sufficient volume were selected for this current study.

*Validation Population: The Childhood Asthma Management Program (CAMP)*

*C*AMP 5 (Clinicaltrials.gov register: [NCT00000575](https://clinicaltrials.gov/ct2/show/NCT00000575)) is a multi-center, randomized, double-masked, clinical trial designed to determine the long-term effects of inhaled treatments for mild to moderate asthma in children. From December 1993 to September 1995 CAMP recruited 1,041 children aged 5 to 12 at baseline with mild to moderate asthma from eight sites in North America (Albuquerque, Baltimore, Boston, Denver, San Diego, Seattle, St Louis and Toronto) 6. Inclusion criteria included chronic asthma symptoms for at least 6 months in the year prior to interview and PC20 < 12.5 mg/mL. Children were randomized to either nedocromil, budesonide or the placebo arm, and then followed up over to the 5 to 6 years of the trial period. All children completed a protocol of questionnaires and spirometry at baseline equivalent to those in GACRS and throughout the 4 years of the trial. Blood samples were collected when the children were not exacerbated at baseline and at the end of the trial. The CAMP study was approved by the institutional review board of Partners Healthcare (Partners Human Research Committee; Protocol#: 1999-P-001549/29), by all eight CAMP clinical centers and by the CAMP Data Coordinating Center. Each child’s parent or guardian signed a consent statement and the clinics also obtained each child’s assent. Participants who had available plasma samples with sufficient volume from the end of the trial visit were selected for this current study.

***LC-MS method descriptions***

**C8-pos: Reversed-phase C8 chromatography/positive ion mode MS detection to measure lipids (Broad Institute)**. Analyses of polar and non-polar plasma lipids were conducted using an LC-MS system comprised of a Shimadzu Nexera X2 U-HPLC (Shimadzu Corp.) coupled to an Exactive Plus orbitrap mass spectrometer (Thermo Fisher Scientific). Plasma samples (10 µL) were extracted for lipid analyses using 190 µL of isopropanol containing 1,2-didodecanoyl-sn-glycero-3-phosphocholine (Avanti Polar Lipids) as an internal standard. After centrifugation, supernatants were injected directly onto a 100 x 2.1 mm, 1.7 µm ACQUITY BEH C8 column (Waters). The column was eluted isocratically with 80% mobile phase A (95:5:0.1 vol/vol/vol 10mM ammonium acetate/methanol/formic acid) for 1 minute followed by a linear gradient to 80% mobile-phase B (99.9:0.1 vol/vol methanol/formic acid) over 2 minutes, a linear gradient to 100% mobile phase B over 7 minutes, then 3 minutes at 100% mobile-phase B. MS analyses were carried out using electrospray ionization in the positive ion mode using full scan analysis over 200–1100 m/z at 70,000 resolution and 3 Hz data acquisition rate. Other MS settings were: sheath gas 50, in source CID 5 eV, sweep gas 5, spray voltage 3 kV, capillary temperature 300°C, S-lens RF 60, heater temperature 300°C, microscans 1, automatic gain control target 1e6, and maximum ion time 100 ms. Raw data were processed using TraceFinder software (Thermo Fisher Scientific) for targeted peak integration and manual review of a subset of identified lipids and using Progenesis QI (Nonlinear Dynamics) for peak detection and integration of both lipids of known identify and unknowns. Lipid identities were determined based on comparison to reference plasma extracts and are denoted by total number of carbons in the lipid acyl chain(s) and total number of double bonds in the lipid acyl chain(s).

**C18-neg: Reversed-phase C18 chromatography/negative ion mode MS detection to measure free fatty acids, bile acids, and metabolites of intermediate polarity (Broad Institute).** Analyses of free fatty acids and bile acids were conducted using an LC-MS system comprised of a Shimadzu Nexera X2 U-HPLC (Shimadzu Corp.) coupled to a Q Exactive hybrid quadrupole orbitrap mass spectrometer (Thermo Fisher Scientific). Plasma samples (30 µL) were extracted using 90 uL of methanol containing 15R-15-methyl-PGA2, 15R-15-methyl-PGF2alpha, 15S-15-methyl-PGD2, 15S-15-methyl-PGE1, and 15S-15-methyl-PGE2 (Cayman Chemical Co.) internal standards and centrifuged (10 min, 9,000 x g, 4°C). The samples were injected onto a 150 x 2 mm ACQUITY BEH C18 column (Waters). The column was eluted isocratically at a flow rate of 400 µL/min with 60% mobile phase A (0.1% formic acid in water) for 4 minutes followed by a linear gradient to 100% mobile phase B (acetonitrile with 0.1% acetic acid) over 8 minutes. MS analyses were carried out in the negative ion mode using electrospray ionization, full scan MS acquisition over 200-550 m/z, and a resolution setting of 70,000. Other MS settings were: sheath gas 45, sweep gas 5, spray voltage -3.5 kV, capillary temperature 320°C, S-lens RF 60, heater temperature 300°C, microscans 1, automatic gain control target 1e6, and maximum ion time 250 ms. Raw data were processed using TraceFinder software (Thermo Fisher Scientific) for targeted peak integration and manual review of a subset of identified metabolites and using Progenesis QI (Nonlinear Dynamics) for peak detection and integration of both metabolites of known identify and unknowns. Metabolite identities were confirmed using authentic reference standards.

**HILIC-pos: Hydrophilic interaction liquid chromatography/positive ion mode MS detection to measure polar metabolites (Broad Institute).** HILIC analyses of water soluble metabolites in the positive ionization mode were conducted using an LC-MS system comprised of a Shimadzu Nexera X2 U-HPLC (Shimadzu Corp.) coupled to a Q Exactive hybrid quadrupole orbitrap mass spectrometer (Thermo Fisher Scientific). Plasma samples (10 µL) were prepared via protein precipitation with the addition of nine volumes of 74.9:24.9:0.2 v/v/v acetonitrile/methanol/formic acid containing stable isotope-labeled internal standards (valine-d8, Sigma-Aldrich; St. Louis, MO; and phenylalanine-d8, Cambridge Isotope Laboratories; Andover, MA). The samples were centrifuged (10 min, 9,000 x g, 4°C), and the supernatants were injected directly onto a 150 x 2 mm, 3 µm Atlantis HILIC column (Waters). The column was eluted isocratically at a flow rate of 250 µL/min with 5% mobile phase A (10 mM ammonium formate and 0.1% formic acid in water) for 0.5 minute followed by a linear gradient to 40% mobile phase B (acetonitrile with 0.1% formic acid) over 10 minutes. MS analyses were carried out using electrospray ionization in the positive ion mode using full scan analysis over 70-800 m/z at 70,000 resolution and 3 Hz data acquisition rate. Other MS settings were: sheath gas 40, sweep gas 2, spray voltage 3.5 kV, capillary temperature 350°C, S-lens RF 40, heater temperature 300°C, microscans 1, automatic gain control target 1e6, and maximum ion time 250 ms. Raw data were processed using TraceFinder software (Thermo Fisher Scientific) for targeted peak integration and manual review of a subset of identified metabolites and using Progenesis QI (Nonlinear Dynamics) for peak detection and integration of both metabolites of known identify and unknowns. Metabolite identities were confirmed using authentic reference standards.

**Amide-neg: Targeted negative ion mode analysis of central metabolites (BIDMC).** Central metabolites including sugars, sugar phosphates, organic acids, purine, and pyrimidines, were extracted from 30 µL of plasma using acetonitrile and methanol and separated using a 100 x 2.1 mm XBridge Amide column (Waters). A high sensitivity Agilent 6490 QQQ MS (Agilent) was used to profile metabolites in the negative ion mode via multiple reaction monitoring (MRM) scanning. MRM parameters for approximately 200 metabolites were previously optimized by infusing authentic reference standards. Raw data were processed using MassHunter Quantitative Analysis Software (Agilent).

***QC prior to and during data acquisition.***

The analytical performance of the LC-MS systems and the quality of the metabolomics data were assured using several strategies. Before analyses of the study samples were initiated, reference plasma extracts and mixtures of synthetic reference standards containing up to ~150 metabolites each were analyzed to assure reproducibility of chromatographic retention times, quality of chromatographic peak shapes, and the sensitivity of the MS system. On a daily basis throughout the analytical run, internal standard signals were monitored in each sample to ensure that each injected properly and to monitor MS sensitivity. Generally, outliers (failed samples) were identified when internal standard levels were more than 2 standard deviations from the mean. Outlier samples were selected for reanalysis, using the same sample extract if the outlier was flagged within a day of its extraction, otherwise a fresh extract was prepared and analyzed**.** In addition, pairs of pooled reference samples (“PREFA” and “PREFB”) were inserted in the analysis queue at intervals of approximately 20 study samples for determination of reproducibility and data standardization. The pooled reference sample was created using small aliquots from each study sample at the time the samples are aliquoted for the four profiling methods. One pooled reference sample from each pair (either PREFA or PREFB) was used to standardize data across the run and between batches using “nearest-neighbor” scaling while a second pooled reference from each pair was used to calculate coefficients of variation (CVs) for every metabolite and unknown measured throughout the analysis. Metabolite signals in PREF samples were also evaluated daily to assure LC retention times and peak shapes. If the pooled reference sample data showed a loss of analytical performance, the queue was stopped until the problem was corrected and the analysis queue was restarted from the last point at which data quality was acceptable.

***Non targeted data processing***

Raw LC-MS data were acquired to the data acquisition computer interfaced to each LC-MS system and then stored on a robust and redundant file storage system (Isilon Systems) accessed via the Broad’s internal network. For data processing, the platform is equipped with >10 powerful workstations configured with multi-core XEON processors, >32 GB of RAM and 2 TB of fast storage (RAID 0 arrays of four drives or NVME ssd). Targeted data processing of known metabolites was achieved using TraceFinder software (Thermo Fisher Scientific). Identities of >600 plasma metabolites have been confirmed using authentic reference standards (MSI Level 1 ID7) and mixtures of reference standards and reference samples were included in each analysis queue to confirm IDs in every dataset. High resolution, nontargeted data were processed using Progenesis QI software (Nonlinear Dynamics) to detect peaks, perform chromatographic retention time alignment, and integrate peak areas. Metabolites of confirmed identity were then annotated in the dataset and unknowns are “tagged” using their measured mass to charge ratio (m/z) and retention time (RT). A significant challenge for large-scale, nontargeted metabolomics studies is accurate “alignment” on unknowns among batches of samples acquired over time. This challenge arises because of the large number of nontargeted features detected in every dataset and the occurrence of minor deviations in measured m/z and RT for each peak as a function of differences in instrument calibration and LC column performance over time. The Broad lab has developed an innovative feature alignment algorithm that overcomes this challenge. The software tool is deployed as a web app and uses a unique approach to detect landmark features and non-parametric retention time scaling to accurately match unknowns between datasets. The output from this workflow is a table of concatenated data from each of the methods, expressed as individual samples in columns and metabolite abundances in rows.

***Data Levels***

In this analysis only Broad defined level 3 quality data was used. i.e., data aggregated in features. That is, redundant ion features were filtered out of the non-targeted datasets. The electrospray ionization process used in LC-MS can generate multiple ion features from a single analyte. Though these methods are aimed at maximizing the relative abundance of [M+H]+ and [M-H]- ions, may also detect lower abundance ion adducts and source fragments. The Broad lab has developed a Python-based web app that can process tabularized “normalized data” and annotates clusters of highly correlated, co-eluting LC-MS peaks. This method computes Spearman correlation coefficients among all LC-MS peaks that coelute within 0.025 minutes of one another. “Cliques” of highly correlated features are then identified based on a Spearman coefficient threshold of 0.8. The algorithm determines whether an [M+H]+ ion (positive ion mode data) or an [M-H]- ion (negative ion mode data) can be identified using mass differences among ions in each clique and, if so, selects that feature as the major ion. Otherwise, the most abundant ion was is selected as the major ion. Minor ions (i.e. redundant ions from each clique) are removed from the dataset.

***Data Processing post data acquisition***

Pooled plasma QC samples were included throughout the assay after intervals of approximately 20 study samples. Metabolites with CV% > 25% or missing > 75% were excluded. Remaining missing values were imputed using the k-nearest-neighbor imputation method (R package "VIM")8. Cluster number k was designated as 3 as recommended 9.We examined the position of pooled plasma QC samples on principal component analysis (PCA) plots, to ensure they formed a tight cluster in the first two principal components (PCs). All metabolites were log-10 transformed and unit-scaled, and distribution of PCs according to demographic variables were examined to ensure these were not driving the PCs. Unnamed metabolites were removed, and datasets were restricted to those metabolites that were present in both GACRS and CAMP, resulting in a total of 589 metabolites for analysis (C8-pos *n*=205; C18-neg *n*=88; HILIC-pos *n*=195; Amide-neg *n*=101).

**eTABLES**

**eTable1: Number of Metabolites included in the analyses following QC and data processing**

| **Cohort** | **Platform** | **N Metabolites** | **N after QC pipeline** | **N after restriction to named metabolites** | **N after restriction to metabolites present in both GACRS and CAMP** |
| --- | --- | --- | --- | --- | --- |
| **GACRS** | **C8-Pos** | 1972 | 1579 | 205 | **205** |
|  | **C18-Neg** | 1286 | 959 | 90 | **88** |
|  | **HILIC-Pos** | 1789 | 1236 | 195 | **195** |
|  | **Amide-Neg** | 108 | 101 | 101 | **101** |
| **CAMP** | **C8-Pos** | 1972 | 1578 | 205 | **205** |
|  | **C18-Neg** | 1286 | 946 | 89 | **88** |
|  | **HILIC-Pos** | 1789 | 1191 | 195 | **195** |
|  | **Amide-Neg** | 108 | 101 | 101 | **101** |

*In total 589 metabolites were included in the analyses for both GACRS and CAMP*

*QC pipeline excluded metabolites on the basis of a CV% >25% or a missingness among samples >75%*

**eTable2: Power to detect small, medium and large differences in effect across increasing number of Endotypes in the GACRS Discovery population according to an ANOVA test**

|  |  | **Cohen's *f* Measure (Effect)** | | |
| --- | --- | --- | --- | --- |
|  |  | **Small (*f*=0.1)** | **Medium (*f*=0.25)** | **Large (*f*=0.4)** |
| **n Endotypes** | **2** | 92.4% | 100% | 100% |
| **3** | 86.8% | 100% | 100% |
| **4** | 82.2% | 100% | 100% |
| **5** | 78.1% | 100% | 100% |
| **6** | 74.6% | 100% | 100% |
| **7** | 71.3% | 100% | 100% |
| **8** | 68.6% | 99% | 100% |
| **9** | 65.9% | 99% | 100% |
| **10** | 63.4% | 99% | 100% |

*Cohen’s F-test provides an estimate of effect magnitude*

*Power calculations assume an alpha of 0.05 and equal number of participants across the endotypes based on the 1151 participants in GACRS*

*Power computed using the pwr.anova.test function from the R package ‘pwr ’[version 1.3-0]*

**eTable3: Adjusted Rand Index demonstrating the similarity in participant clustering between the four different profiling platforms and the fused network in GACRS**

|  |  | **Fused Network** | **C8** | **C18** | **HILIC-Pos** | **Amide** |
| --- | --- | --- | --- | --- | --- | --- |
|  |  | **cluster 1 n=213 cluster 2 n=270 cluster 3 n=222**  **cluster 4 n=232**  **cluster 5 n=214** | **cluster 1 n=555 cluster 2 n=596** | **cluster 1 n=515 cluster 2 n=636** | **cluster 1 n=583 cluster 2 n=568** | **cluster 1 n=297 cluster 2 n=377 cluster 3 n=477** |
| **Fused Network** | **cluster 1 n=213 cluster 2 n=270 cluster 3 n=222**  **cluster 4 n=232**  **cluster 5 n=214** | 1.0000 |  |  |  |  |
| **c8** | **cluster 1 n=555 cluster 2 n=596** | 0.1385 | 1.0000 |  |  |  |
| **c18** | **cluster 1 n=515 cluster 2 n=636** | 0.1544 | 0.0005 | 1.0000 |  |  |
| **HILIC-Pos** | **cluster 1 n=583 cluster 2 n=568** | 0.1019 | 0.0954 | 0.0054 | 1.0000 |  |
| **Amide** | **cluster 1 n=297 cluster 2 n=377 cluster 3 n=477** | 0.2972 | 0.0023 | 0.0466 | 0.0566 | 1.0000 |

*Participants clustered into two groups for the c8, c18 and HILIC-pos platforms all and three groups for the Amide platform*

*The Adjusted Rand Index is scored from 0 to 1, with 1 indicating identical grouping*

**eTables4-8**

See attached excel files. Metabolite associations with endotype membership for Endotype one (eTable4), two, (eTable5), three (eTable6), four (eTable7), and five (eTable8)

**eTable9: Number of Metabolites associated with membership of each endotype and the crossover in associations between endotypes**

|  |  | **Endotype 1** | **Endotype 2** | **Endotype 3** | **Endotype 4** | **Endotype 5** |
| --- | --- | --- | --- | --- | --- | --- |
|  |  | **n=147** | **n=256** | **n=161** | **n=332** | **n=269** |
| **Endotype 1** | **n=147** | 147 |  |  |  |  |
| **Endotype 2** | **n=256** | 59 | 256 |  |  |  |
| **Endotype 3** | **n=161** | 33 | 90 | 161 |  |  |
| **Endotype 4** | **n=332** | 113 | 186 | 134 | 332 |  |
| **Endotype 5** | **n=269** | 68 | 151 | 111 | 187 | 269 |

*Associations based on a meta-analysis of results from GACRS, CAMP restricting to those that were significant at a Bonferroni correction accounting for 589 metabolites (8.5x10-5) and that we in a concordant direction of effect in both cohorts*

**eTable10: Metabolites uniquely associated with membership of each endotype**

| **Endotype 1** | | **Endotype 2** | | **Endotype 3** | | **Endotype 4** | | **Endotype 5** | |
| --- | --- | --- | --- | --- | --- | --- | --- | --- | --- |
| **Metabolite** | **-/+** | **Metabolite** | **-/+** | **Metabolite** | **-/+** | **Metabolite** | **-/+** | **Metabolite** | **-/+** |
| Glyoxylic Acid | **-** | 2-ketoisovaleric acid KIV | - | 9-cis-retinoic acid | - | phytanate | - | glycocholate | - |
| Glucose/Fructose/Galactose_waterloss | **-** | a-Ketoglutaric acid | - | sebacate | - | 7-dehydro-desmosterol | - | Glycochenodeoxycholic acid | - |
| Inosine | **-** | TG(58:10) | - | 3-methyladipate | - | SM(d18:1/22:1) | - | Glycocholic acid | - |
| phenylacetylglutamine | **-** | acetaminophen | - | Lactic acid | - | hydroxymyristate | - | Taurocholic acid | - |
| 2-Deoxyuridine | **+** | N-Arachidonoyl Dopamine | + | sphingosine-1-phosphate | - | GABA | - | allantoin | - |
| TG(58:11) | **+** | 2-aminohippuric acid | + | Taurodeoxycholic acid / Taurochenodeoxycholic acid | - | PC(38:4) | - | asparagine | - |
| TG(56:9) | **+** | deoxycholate | + | C5:1 carnitine | - | hexadecanedioate | - | thiamine | - |
| PE(P-40:6)/PE(O-40:7) | **+** | TG(52:5) | + | N-Docosanoyl Taurine | - | SM(d18:1/24:1) | - | TG(54:5) | - |
| PE(P-36:4)/PE(O-36:5) | **+** | heptadecanoate | + | 2-aminooctanoate | - | PC(P-38:3)/PC(O-38:4) | - | phenyllactate | - |
| PC(P-34:4)/PC(O-34:5) | **+** | guanidinoacetic acid | + | N-Acetyl-L-Aspartic acid | + | LPE(22:6) | - | TG(54:6) | - |
| PE(P-34:1)/PE(O-34:2) | **+** | N-Oleoyl Dopamine | + | Uric acid | + | PC(40:9) | - | glycine | - |
| PE(P-38:4)/PE(O-38:5) | **+** | furoylglycine | + |  |  | LPE(22:6) | - | 4-hydroxystyrene | - |
| Adenine | **+** | DG(36:3) | + |  |  | HETE | - | phosphocholine | - |
| Malic acid | **+** | PC(P-34:2)/PC(O-34:3) | + |  |  | PC(P-36:1)/PC(O-36:2) | - | taurodeoxycholate | - |
| Glutamic acid | **+** | 11-HDoHE | + |  |  | PC(P-36:3)/PC(O-36:4) | - | TG(54:7) | - |
|  |  | kynurenic acid | + |  |  | C4 carnitine | - | CDP-Choline | - |

**eTable10: continued**

| **Endotype 1** | | **Endotype 2** | | **Endotype 3** | | **Endotype 4** | | **Endotype 5** | |
| --- | --- | --- | --- | --- | --- | --- | --- | --- | --- |
| **Metabolite** | **-/+** | **Metabolite** | **-/+** | **Metabolite** | **-/+** | **Metabolite** | **-/+** | **Metabolite** | **-/+** |
|  |  | 2-Aminoadipic acid | + |  |  | PE(P-36:0)/PE(O-36:1) | - | N-methylproline | - |
|  |  | threonine | + |  |  | PC(P-36:4)/PC(O-36:5)_A | - | hydroxyproline | - |
|  |  | 4-acetamidobutanoate | + |  |  | caprylate | - | AMP | - |
|  |  | ATP | + |  |  | PC(P-38:6)/PC(O-38:7) | - | cortisone | + |
|  |  | PC(36:4-OH) | + |  |  | eicosenoate | - | SM(d18:1/18:1) | + |
|  |  | DHAP/Glyceraldehyde-3-P | + |  |  | isoleucine | - | Pseudouridine | + |
|  |  | PE(P-36:3)/PE(O-36:4) | + |  |  | PC(P-38:5)/PC(O-38:6) | - | N-Acetyl-L-Alanine | + |
|  |  | PC(34:2) | + |  |  | PC(P-36:2)/PC(O-36:3) | - | cyclic-AMP | + |
|  |  |  |  |  |  | nonadecanoate | - | 2-aminoisobutyric acid | + |
|  |  |  |  |  |  | homocitrulline | - | CE(16:1) | + |
|  |  |  |  |  |  | Kynurenic acid | - | CE(18:3) | + |
|  |  |  |  |  |  | Oleoyl Leucine | - | CE(20:5) | + |
|  |  |  |  |  |  | PC(P-36:4)/PC(O-36:5)_B | - | theophylline | + |
|  |  |  |  |  |  | hydrocinnamate | - | xanthosine | + |
|  |  |  |  |  |  | PC(34:3) | - | Acetoacetic acid | + |
|  |  |  |  |  |  | pseudouridine | - |  |  |
|  |  |  |  |  |  | Citrulline | - |  |  |
|  |  |  |  |  |  | UDP-glucose / -galactose | - |  |  |
|  |  |  |  |  |  | PC(38:3) | - |  |  |

**eTable11**

See attached excel file. SNPs associated with membership of the “most-severe” endotype 2

**eTable12: Gene Set Enrichment Analysis Results for SNPs associated with membership of Endotype Two**

| **Term Name** | **Term ID** | **p-value** |
| --- | --- | --- |
| anatomical structure morphogenesis | GO:0009653 | 1.80E-05 |
| nervous system development | GO:0007399 | 5.23E-05 |
| neuron projection morphogenesis | GO:0048812 | 9.01E-05 |
| cell development | GO:0048468 | 9.99E-05 |
| neuron development | GO:0048666 | 1.00E-04 |
| neuron projection development | GO:0031175 | 1.31E-04 |
| plasma membrane bounded cell projection morphogenesis | GO:0120039 | 1.56E-04 |
| neuron differentiation | GO:0030182 | 1.69E-04 |
| cell projection morphogenesis | GO:0048858 | 1.70E-04 |
| generation of neurons | GO:0048699 | 2.65E-04 |
| cell part morphogenesis | GO:0032990 | 3.37E-04 |
| neurogenesis | GO:0022008 | 0.001 |
| cell morphogenesis involved in neuron differentiation | GO:0048667 | 0.001 |
| hsa-miR-4517 | MIRNA:hsa-miR-4517 | 0.003 |
| dendrite development | GO:0016358 | 0.004 |
| hsa-miR-8485 | MIRNA:hsa-miR-8485 | 0.004 |
| cellular response to stimulus | GO:0051716 | 0.006 |
| regulation of anatomical structure morphogenesis | GO:0022603 | 0.008 |
| signaling | GO:0023052 | 0.008 |
| cell morphogenesis | GO:0000902 | 0.008 |
| plasma membrane bounded cell projection organization | GO:0120036 | 0.009 |
| signal transduction | GO:0007165 | 0.010 |
| Chondroitin sulfate/dermatan sulfate metabolism | REAC:R-HSA-1793185 | 0.011 |
| cell communication | GO:0007154 | 0.012 |
| cell projection organization | GO:0030030 | 0.016 |
| positive regulation of muscle tissue development | GO:1901863 | 0.020 |
| chondroitin sulfate proteoglycan biosynthetic process | GO:0050650 | 0.020 |
| proteoglycan biosynthetic process | GO:0030166 | 0.020 |
| Glycosaminoglycan biosynthesis - chondroitin sulfate / dermatan sulfate | KEGG:00532 | 0.025 |
| system development | GO:0048731 | 0.028 |
| synapse | GO:0045202 | 0.028 |
| cell morphogenesis involved in differentiation | GO:0000904 | 0.031 |
| cardiovascular system development | GO:0072358 | 0.032 |
| Glutamatergic synapse | KEGG:04724 | 0.033 |
| tube development | GO:0035295 | 0.034 |

**eTable12: continued**

| Term Name | Term ID | p-value |
| --- | --- | --- |
| cellular component morphogenesis | GO:0032989 | 0.034 |
| neuron part | GO:0097458 | 0.038 |
| Glycosaminoglycan metabolism | REAC:R-HSA-1630316 | 0.044 |
| positive regulation of cardiac muscle tissue development | GO:0055025 | 0.045 |
| axon guidance | GO:0007411 | 0.045 |
| postsynaptic membrane | GO:0045211 | 0.048 |
| proteoglycan metabolic process | GO:0006029 | 0.049 |

**eFIGURES**

**eFigure1: Study Schematic**


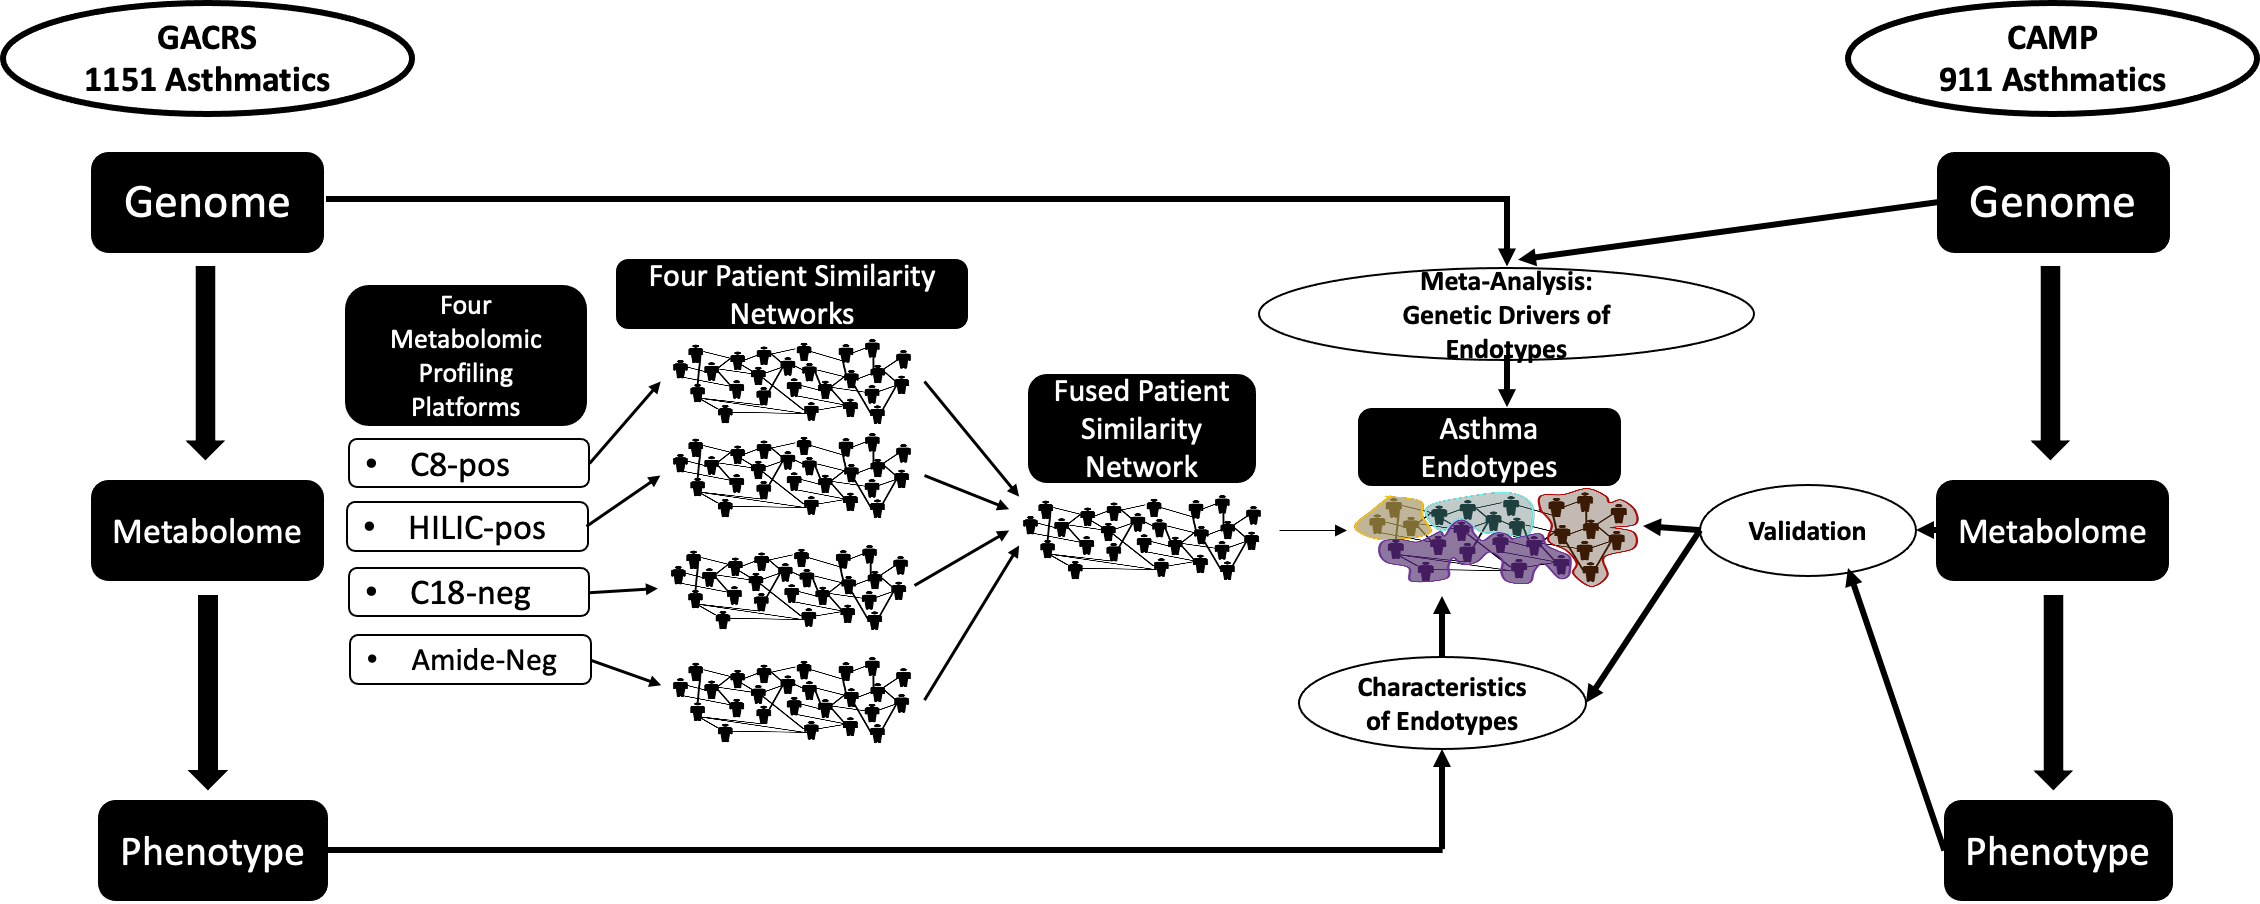


**eFigure2: Illustrations of metabo-endotypes in CAMP. A) Heatmap of the fused patient similarity network. B) Network representation of the fused patient similarity network, where each node is a patient.**

*
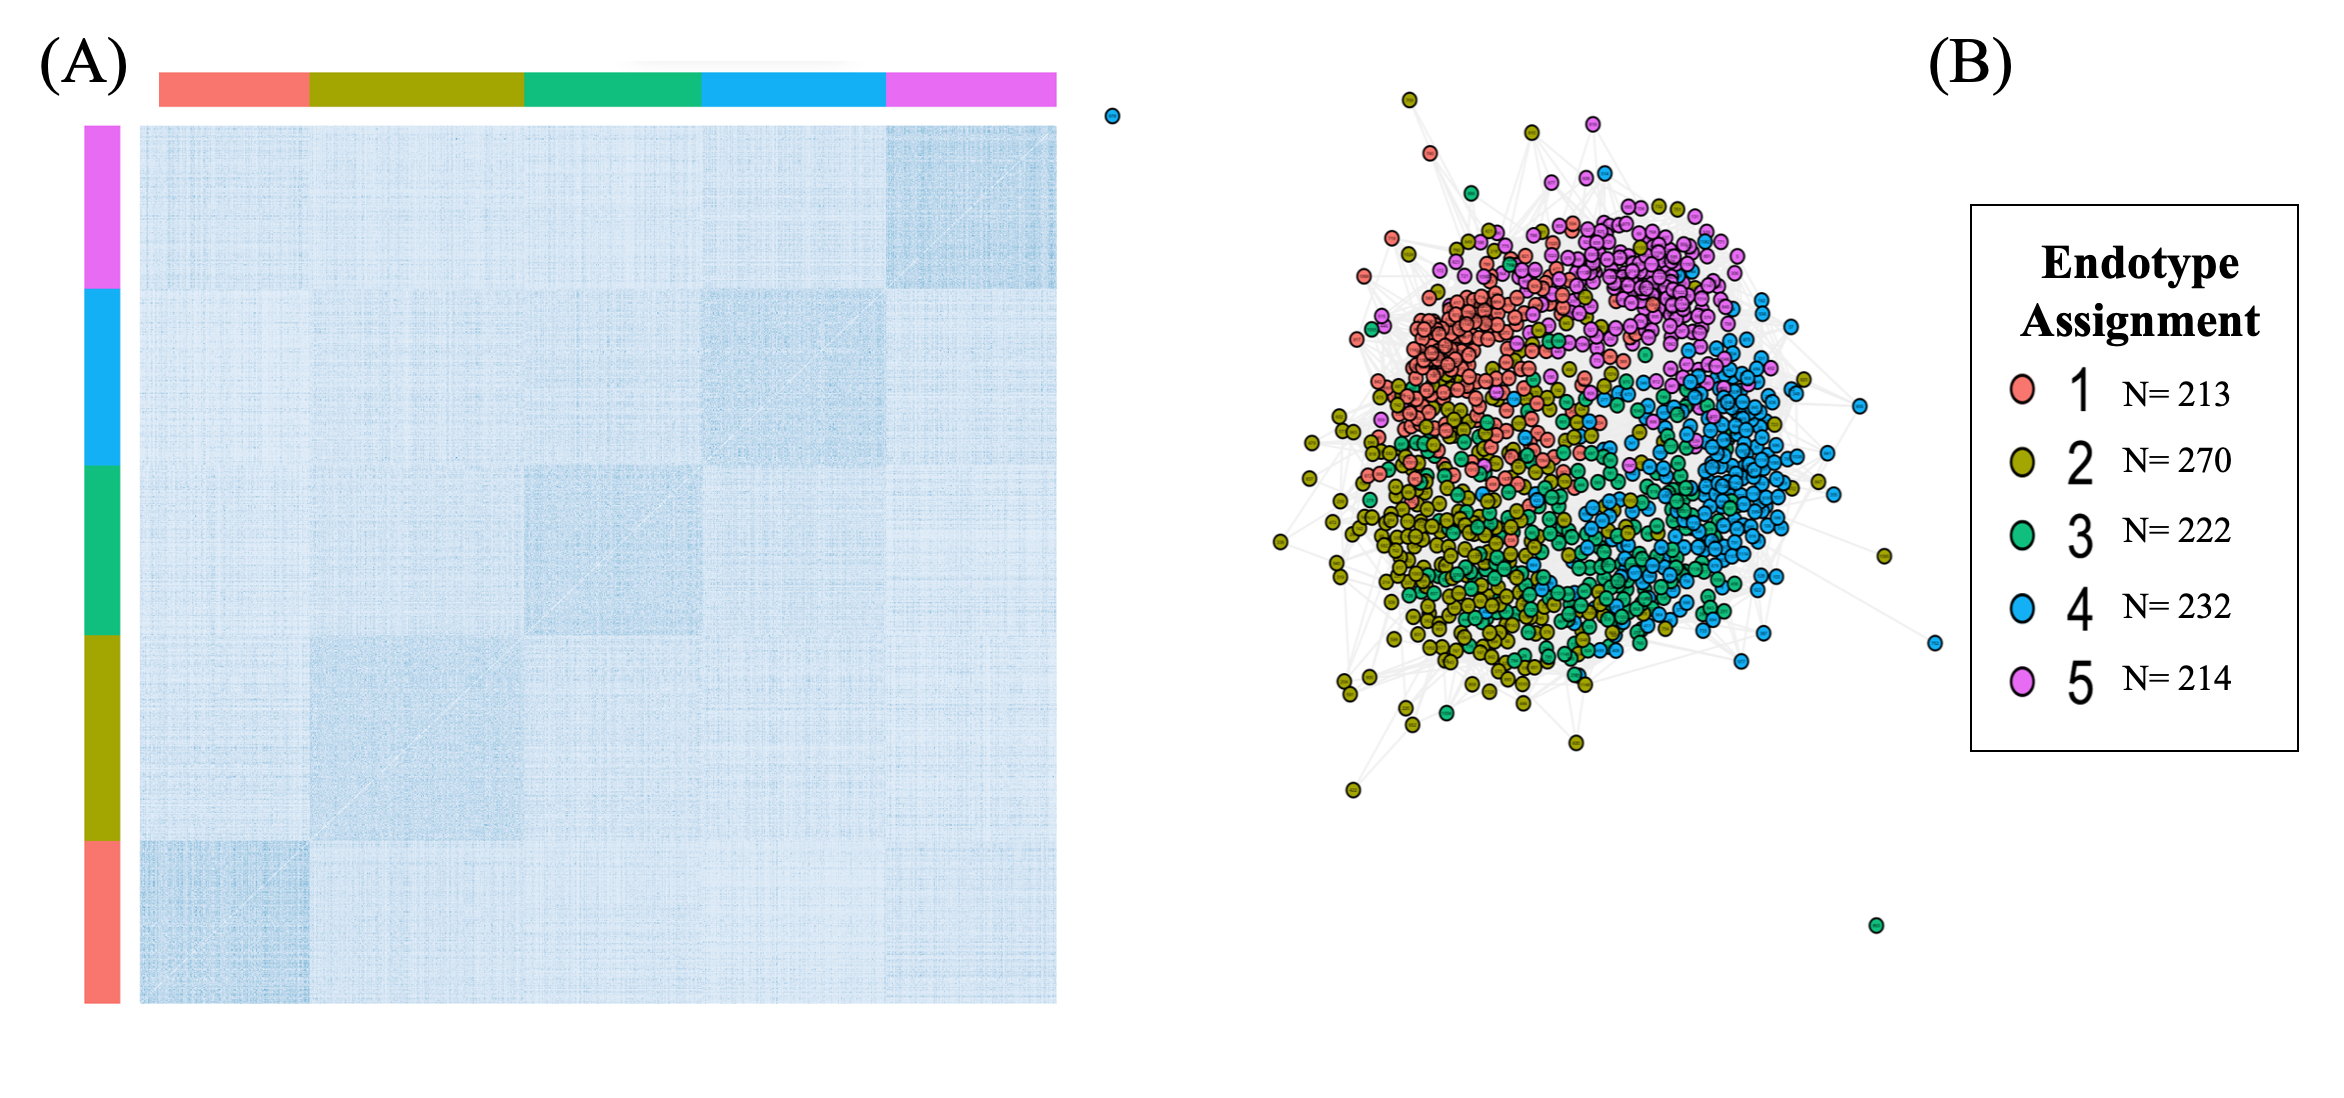
*

Using both the eigengap heuristic and the rotational cost, we noted that the second-best number of clusters by both methods were in agreement; five clusters

**eFigure3: Percent Predicted FVC across GACRS and CAMP**

**
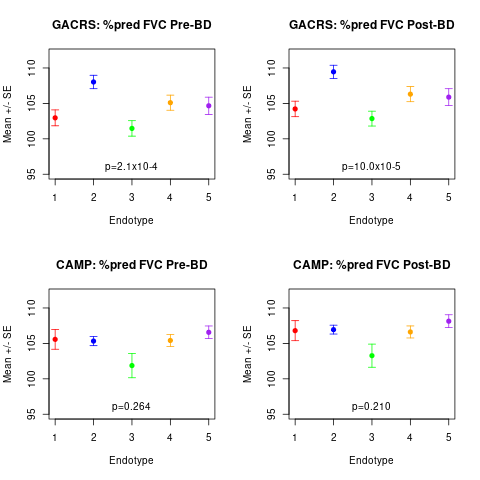
**

**eFigure4: Asthma Severity measures that differed significantly (p<0.05) across GACRS endotypes (Percentage reporting yes for each endotype)**

**
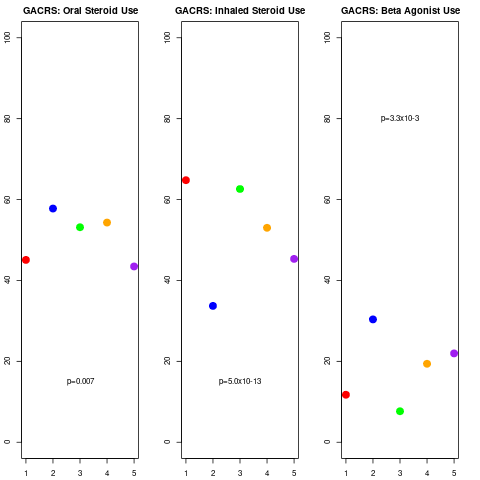
**

**eFigure5: Allergic Endotypes in Both the Genetic Epidemiology of Asthma in Costa Rica Study (GACRS) and The Childhood Asthma Management Program (CAMP)**

*
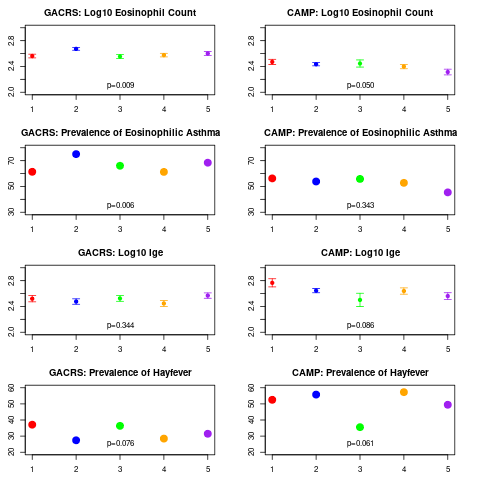
*

**eFigure6: Asthma Severity measures across CAMP endotypes (Percentage reporting yes for each endotype)**

**
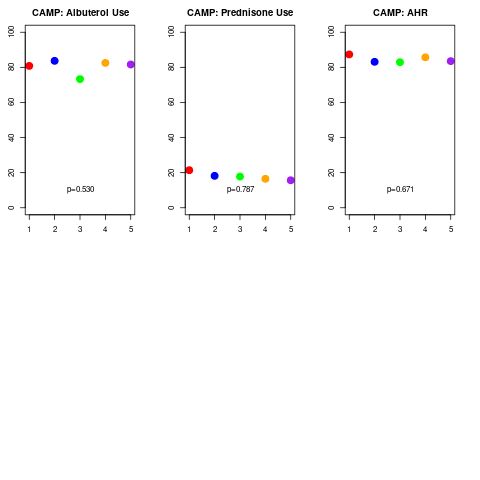
**

**eFigure7: Metabolites Associated with Membership of Each Endotype based on a meta-analysis of GACRS and CAMP, Colored according to SuperPathway**

***
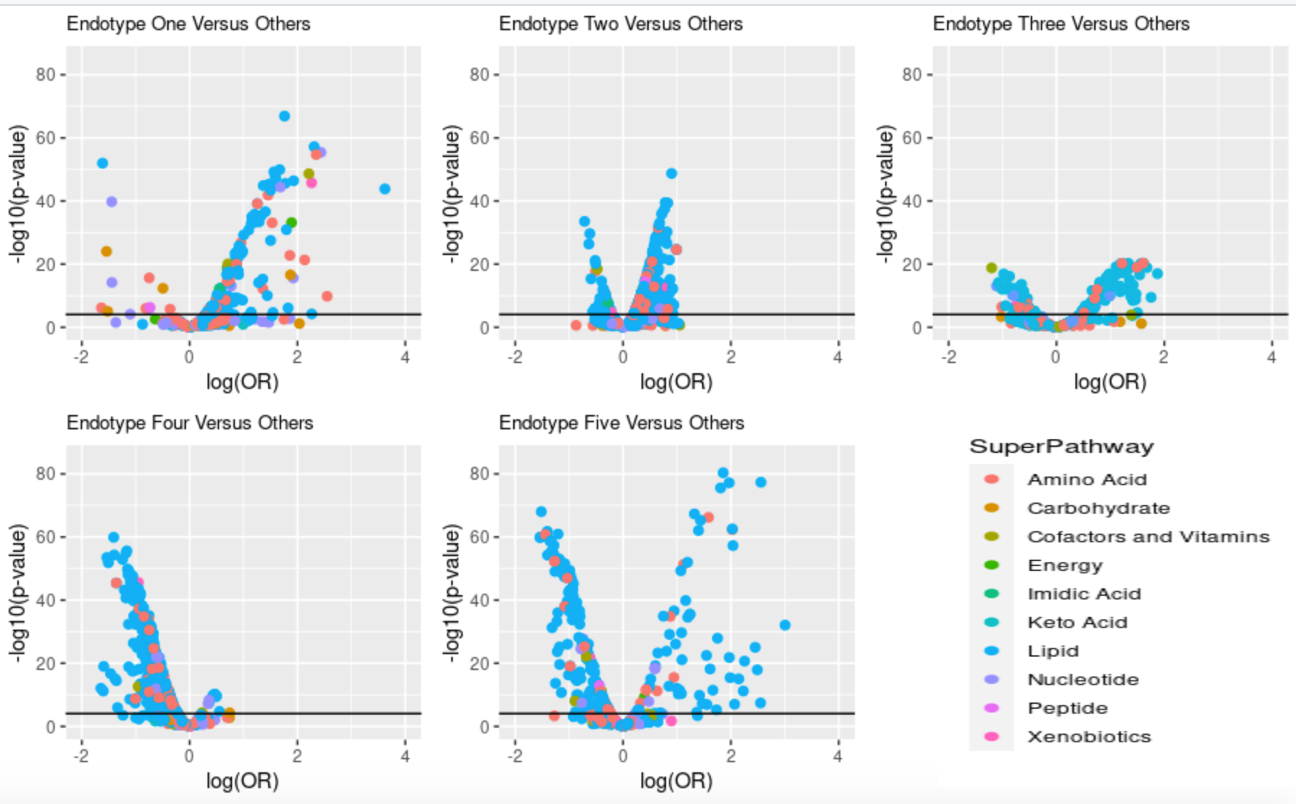
***

*Black horizontal line indicates Bonferonni significance threshold (p<8.48x10-5)*

**eFigure8: Number of Metabolites associated with membership of each endotype and the crossover in associations between endotypes**

*Associations based on a meta-analysis of results from GACRS, CAMP restricting to those that were significant at a Bonferroni correction accounting for 589 metabolites (8.5x10-5) and that we in a concordant direction of effect in both cohorts*

**eFigure9: Manhattan Plot demonstrating SNPs associated with Membership of Endotype Two; the lead SNP for each chromosome is shown, labelled with the nearest gene where possible**

**
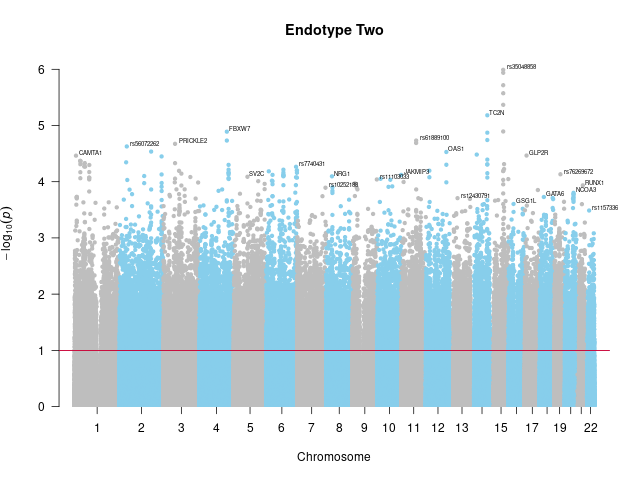
**

**References**

1. Kelly RS, Virkud Y, Giorgio R, Celedon JC, Weiss ST, Lasky-Su J. Metabolomic profiling of lung function in Costa-Rican children with asthma. *Biochim Biophys Acta Mol Basis Dis.* 2017;1863(6):1590-1595.

2. A genome-wide search for asthma susceptibility loci in ethnically diverse populations. The Collaborative Study on the Genetics of Asthma (CSGA). *Nat Genet.* 1997;15(4):389-392.

3. Virkud YV, Kelly RS, Croteau-Chonka DC, et al. Novel eosinophilic gene expression networks associated with IgE in two distinct asthma populations. *Clin Exp Allergy.* 2018;48(12):1654-1664.

4. Brehm JM, Celedon JC, Soto-Quiros ME, et al. Serum vitamin D levels and markers of severity of childhood asthma in Costa Rica. *Am J Respir Crit Care Med.* 2009;179(9):765-771.

5. The Childhood Asthma Management Program (CAMP): design, rationale, and methods. Childhood Asthma Management Program Research Group. *Control Clin Trials.* 1999;20(1):91-120.

6. Recruitment of participants in the childhood Asthma Management Program (CAMP). I. Description of methods: Childhood Asthma Management Program Research Group. *J Asthma.* 1999;36(3):217-237.

7. Sumner LW, Amberg A, Barrett D, et al. Proposed minimum reporting standards for chemical analysis Chemical Analysis Working Group (CAWG) Metabolomics Standards Initiative (MSI). *Metabolomics.* 2007;3(3):211-221.

8. Kowarik ATM. Imputation with the R Package VIM. *Journal of Statistical Software.* 2016;74(7).

9. Do KT, Wahl S, Raffler J, et al. Characterization of missing values in untargeted MS-based metabolomics data and evaluation of missing data handling strategies. *Metabolomics.* 2018;14(10):128.
