# Supplementary material for: Metabo-Endotypes of Asthma Reveal Clinically Important Differences in Lung Function: Discovery and validation in two TOPMed Cohorts
Source: Research Square preprint supplement (doi:10.21203/rs.3.rs-358819/v1), 2021-03-31
Supplement: Supplementary file 3 [file 978d84122a3b61c0a283fd15.xls]

## Sheet: eTable11
SNP	Gene	Chromosome	Meta-analyzed OR	Meta-analyzed P-value	GACRS OR	GACRS lower 95%CI	GACRS upper 95%CI	GACRS P-value	CAMP OR	CAMP lower 95%CI	CAMP upper 95%CI	CAMP P-value
rs10008238	MAPK10	4	0.7878	0.003053	0.7999	0.6445	0.9927	0.04276	0.7742	0.6144	0.9755	0.02998
rs10008587	NA	4	0.7347	0.002411	0.7751	0.6065	0.9907	0.04187	0.6626	0.4712	0.9317	0.01793
rs10010838	NA	4	0.7537	0.005057	0.7841	0.6161	0.9979	0.04802	0.695	0.492	0.9817	0.03894
rs10019596	NA	4	0.7292	0.001854	0.7607	0.5937	0.9746	0.03052	0.6758	0.4846	0.9426	0.021
rs1002358	LRP8	1	0.6847	0.001657	0.7118	0.5125	0.9887	0.0426	0.657	0.468	0.9222	0.01519
rs10026556	NA	4	0.7424	0.003483	0.765	0.5959	0.982	0.03553	0.7041	0.5048	0.9819	0.03868
rs10031964	NA	4	0.7318	0.002403	0.7562	0.5897	0.9697	0.02763	0.6872	0.487	0.9698	0.0328
rs10034933	NA	4	0.7219	0.001321	0.7454	0.5811	0.9561	0.02071	0.6821	0.49	0.9496	0.02344
rs10038434	PPARGC1B	5	1.3318	0.0003654	1.391	1.121	1.725	0.002705	1.267	1.005	1.596	0.04481
rs10039872	NA	5	0.7772	0.001715	0.7934	0.6414	0.9813	0.03282	0.7579	0.5994	0.9583	0.02057
rs10049556	NA	4	0.7086	0.0003831	0.7279	0.5728	0.9251	0.009426	0.6771	0.4956	0.925	0.01429
rs10055770	IL6ST	5	1.2948	0.001045	1.238	1.002	1.53	0.04761	1.363	1.087	1.71	0.007241
rs10055810	NA	5	1.33	0.0003724	1.363	1.099	1.689	0.004724	1.293	1.027	1.627	0.02907
rs10063333	NA	5	0.7481	0.0002711	0.7986	0.6473	0.9853	0.03589	0.69	0.5462	0.8716	0.001857
rs10076303	PPARGC1B	5	1.3327	0.0003554	1.387	1.118	1.721	0.00292	1.273	1.01	1.603	0.04091
rs10090261	NA	8	0.7435	0.002346	0.7658	0.5939	0.9874	0.03965	0.7157	0.5361	0.9556	0.02336
rs10093886	NA	8	1.2939	0.001517	1.286	1.039	1.592	0.02061	1.304	1.026	1.658	0.02994
rs10104141	SULF1	8	0.7627	0.0007504	0.7759	0.6289	0.9574	0.01798	0.746	0.5879	0.9465	0.01582
rs10106029	ZFPM2	8	0.763	0.001134	0.7549	0.6073	0.9384	0.01131	0.7734	0.6048	0.9889	0.04047
rs10106620	CSMD1	8	0.797	0.004684	0.8035	0.6502	0.993	0.04285	0.789	0.6238	0.9979	0.04796
rs10109272	NRG1	8	0.7425	0.001705	0.7126	0.5426	0.9358	0.01479	0.7696	0.5967	0.9927	0.04376
rs10111363	PTK2	8	0.7869	0.003179	0.8001	0.6458	0.9913	0.04135	0.7708	0.6074	0.9782	0.03222
rs10118365	RALGPS1	9	1.2716	0.002186	1.239	1.004	1.529	0.04606	1.31	1.045	1.64	0.01893
rs10123947	VAV2	9	1.5629	0.001396	1.554	1.03	2.344	0.0356	1.57	1.087	2.267	0.0161
rs10148108	NA	14	1.417	0.0005399	1.363	1.059	1.754	0.0161	1.507	1.097	2.07	0.01136
rs10153669	NA	2	1.5101	0.003855	1.526	1.016	2.293	0.04172	1.496	1.018	2.197	0.04025
rs1015786	NA	19	1.3905	0.0008094	1.391	1.069	1.81	0.01387	1.39	1.047	1.847	0.02285
rs10165233	KIF1A	2	1.4205	0.00169	1.45	1.065	1.973	0.0182	1.391	1.018	1.899	0.03802
rs10169869	NA	2	1.3443	0.0009242	1.341	1.068	1.684	0.0115	1.349	1.026	1.774	0.03181
rs10175212	ST6GAL2	2	0.6751	0.001389	0.6664	0.4685	0.9477	0.02389	0.6829	0.4909	0.95	0.02353
rs1018297	NA	12	0.5679	6.37e-05	0.5307	0.365	0.7714	0.0009014	0.6168	0.4081	0.9323	0.02189
rs1018622136	NA	10	0.723	0.001399	0.6949	0.5212	0.9266	0.01316	0.7497	0.5691	0.9876	0.04046
rs10200675	NA	2	0.7752	0.001348	0.7823	0.6314	0.9691	0.02464	0.7674	0.6118	0.9625	0.02201
rs10205493	EML6	2	0.7672	0.000824	0.7816	0.6349	0.9623	0.02021	0.7493	0.5931	0.9466	0.0155
rs1021309	NA	11	1.5654	0.001186	1.598	1.097	2.328	0.01452	1.531	1.035	2.262	0.0328
rs1022376	NA	2	0.7891	0.00269	0.7881	0.6362	0.9761	0.02914	0.7902	0.6317	0.9885	0.0393
rs10225533	NA	7	1.4498	0.0005406	1.401	1.079	1.819	0.01136	1.545	1.082	2.204	0.01654
rs1023707	TTC21B	2	0.7206	0.0003508	0.7221	0.5805	0.8983	0.003474	0.7175	0.523	0.9843	0.03961
rs10252188	NA	7	0.7373	0.0001279	0.7915	0.6416	0.9763	0.02898	0.6755	0.535	0.8528	0.0009714
rs10277344	NA	7	0.75	0.004638	0.7636	0.5833	0.9996	0.04963	0.734	0.5461	0.9866	0.04045
rs1038073	NA	5	1.3288	0.0003912	1.367	1.103	1.693	0.004334	1.286	1.021	1.62	0.03242
rs10401429	NA	19	1.3905	0.0008412	1.391	1.068	1.813	0.0144	1.39	1.047	1.847	0.02285
rs10403546	NFIC	19	0.7662	0.0005697	0.755	0.615	0.9268	0.007234	0.7799	0.6229	0.9766	0.03028
rs10421391	NA	19	1.2935	0.001166	1.246	1.014	1.531	0.0366	1.359	1.073	1.722	0.01098
rs10425784	NA	19	1.3797	0.001187	1.382	1.059	1.804	0.01713	1.377	1.035	1.832	0.02786
rs10433282	NA	21	0.5682	0.003871	0.5767	0.3383	0.9832	0.04315	0.5592	0.3219	0.9713	0.03909
rs10458211	RIOK1	6	0.7868	0.002704	0.79	0.6411	0.9735	0.02698	0.7826	0.6174	0.9919	0.04266
rs10471960	IL6ST	5	1.4459	0.001111	1.442	1.058	1.967	0.02063	1.45	1.056	1.991	0.02149
rs10497598	PDE1A	2	0.7202	0.004521	0.7205	0.525	0.9888	0.04238	0.7198	0.5202	0.9958	0.04711
rs10510591	NEK10	3	0.773	0.003054	0.8043	0.6478	0.9986	0.04853	0.7247	0.5498	0.9552	0.02229
rs10511592	NFIB	9	0.7306	0.001858	0.7685	0.5988	0.9863	0.03859	0.6707	0.485	0.9276	0.01577
rs10515632	NA	5	1.3474	0.0002204	1.404	1.132	1.742	0.002004	1.284	1.017	1.621	0.03537
rs10516536	NA	4	0.5785	0.0001455	0.5696	0.3598	0.9016	0.01631	0.584	0.4083	0.8354	0.003237
rs10519043	ANXA2	15	1.4142	0.001964	1.4	1.061	1.848	0.01747	1.438	1.005	2.057	0.04669
rs10520528	TENM3	4	1.2953	0.0008499	1.29	1.052	1.582	0.01439	1.302	1.037	1.636	0.02315
rs106111	PLEKHG3	14	1.3044	0.002814	1.277	1.001	1.629	0.04916	1.334	1.039	1.713	0.02383
rs1073625	NA	19	1.3796	0.001148	1.402	1.076	1.827	0.01226	1.354	1.018	1.801	0.03719
rs10738790	LINGO2	9	0.7392	0.0001371	0.782	0.6362	0.9613	0.01955	0.6869	0.5426	0.8695	0.001798
rs1073950	NA	18	1.337	0.001931	1.315	1.044	1.656	0.01988	1.376	1.016	1.865	0.03912
rs1074227	NA	22	1.2877	0.001044	1.27	1.037	1.556	0.02096	1.31	1.045	1.643	0.0193
rs10744128	MGST1	12	0.7387	0.0002807	0.7248	0.5788	0.9076	0.00503	0.7546	0.5947	0.9573	0.02039
rs10747832	NA	12	1.3639	0.001466	1.349	1.042	1.747	0.02312	1.382	1.04	1.836	0.02557
rs10759184	NA	9	0.756	0.0006326	0.8017	0.6483	0.9914	0.04141	0.6995	0.5477	0.8933	0.004183
rs10760478	RALGPS1	9	1.2886	0.001196	1.265	1.025	1.561	0.02834	1.316	1.052	1.648	0.01637
rs10773892	NA	12	0.7578	0.0005478	0.7345	0.5902	0.914	0.00568	0.7835	0.6247	0.9826	0.03471
rs10778561	BTBD11	12	1.2875	0.004605	1.276	1.005	1.618	0.04519	1.301	1.006	1.682	0.04526
rs10779702	RERE	1	0.7715	0.00405	0.7688	0.5942	0.9947	0.04545	0.7739	0.6066	0.9872	0.03902
rs10786435	HPSE2	10	0.7978	0.004309	0.8091	0.6593	0.9931	0.04275	0.7828	0.6173	0.9926	0.0433
rs10789557	GUCY1A2	11	1.3421	0.0003541	1.246	1.001	1.55	0.04916	1.467	1.155	1.864	0.001688
rs10791692	NA	11	1.506	0.001522	1.453	1.021	2.069	0.03808	1.564	1.088	2.248	0.01565
rs10793954	NA	9	0.8018	0.005074	0.8131	0.6626	0.9978	0.04761	0.7871	0.6219	0.9963	0.04653
rs10798851	NA	1	0.7072	4.888e-05	0.695	0.5566	0.8677	0.001312	0.7234	0.5611	0.9328	0.01254
rs10801015	NA	1	0.7681	0.000983	0.8014	0.6491	0.9894	0.03945	0.7285	0.5759	0.9217	0.0083
rs10812752	LINGO2	9	0.7591	0.000476	0.7527	0.6119	0.9258	0.007148	0.7672	0.6079	0.9682	0.02558
rs10823829	CDH23	10	0.5978	9.231e-05	0.6296	0.4658	0.851	0.002622	0.5187	0.3151	0.8539	0.009858
rs10838794	PTPRJ	11	1.465	0.0009704	1.47	1.092	1.978	0.01098	1.458	1.026	2.073	0.03546
rs10848777	NA	12	0.7592	0.000635	0.7437	0.6017	0.9192	0.006162	0.7791	0.6145	0.9879	0.03938
rs10853694	MIB1	18	0.7265	0.0007239	0.6984	0.5261	0.9271	0.01301	0.7482	0.5858	0.9557	0.02018
rs10881599	SLC16A12	10	0.7739	0.001677	0.7743	0.6238	0.9612	0.0204	0.7734	0.6098	0.9807	0.03395
rs10890630	GUCY1A2	11	1.3373	0.0004287	1.251	1.004	1.557	0.04553	1.448	1.14	1.84	0.002446
rs10897739	NA	11	0.7929	0.005554	0.7972	0.6357	0.9998	0.0498	0.7882	0.6212	1	0.04996
rs10897750	NA	11	0.7593	0.003455	0.7546	0.5853	0.973	0.02993	0.7645	0.5845	1	0.04998
rs10899102	MOGAT2	11	1.2612	0.002851	1.249	1.019	1.53	0.03216	1.277	1.014	1.608	0.03758
rs10916322	NA	1	1.4995	0.0007733	1.494	1.093	2.041	0.01176	1.507	1.05	2.163	0.02622
rs10917878	NA	1	1.3147	0.001034	1.326	1.067	1.647	0.01085	1.3	1.014	1.666	0.03821
rs10917994	NA	1	0.7788	0.001593	0.8074	0.6546	0.9959	0.0457	0.7456	0.5921	0.9391	0.01262
rs10934400	NA	3	1.526	0.0001367	1.562	1.178	2.071	0.001936	1.475	1.05	2.074	0.02518
rs10936885	NA	3	0.6602	0.0008601	0.6234	0.4424	0.8784	0.006916	0.7003	0.4947	0.9914	0.04459
rs10937214	MAP3K13	3	0.7245	0.001038	0.7721	0.6062	0.9835	0.03619	0.6491	0.4723	0.8921	0.007732
rs10937504	NA	3	0.7447	0.002921	0.7514	0.5825	0.9694	0.02788	0.7356	0.5452	0.9926	0.04461
rs10939343	NA	4	1.3159	0.0008537	1.304	1.054	1.614	0.01464	1.332	1.04	1.704	0.0229
rs10962923	CNTLN	9	0.7229	0.001889	0.7223	0.5486	0.9511	0.02048	0.7237	0.5328	0.983	0.0385
rs10973345	ZBTB5	9	1.4347	0.004853	1.39	1.004	1.926	0.04733	1.503	1.013	2.231	0.04289
rs10978509	NA	9	0.7293	0.0006629	0.7183	0.5603	0.9209	0.009045	0.7422	0.5687	0.9688	0.02829
rs1098779	NA	10	1.4739	0.0005142	1.461	1.108	1.925	0.007181	1.496	1.045	2.142	0.02782
rs10989073	NA	9	1.3925	0.001811	1.351	1.014	1.8	0.03982	1.44	1.064	1.947	0.01809
rs10989074	NA	9	1.3896	0.001887	1.345	1.011	1.79	0.04212	1.441	1.066	1.949	0.01759
rs1101476	NA	1	1.3376	0.002594	1.332	1.027	1.729	0.03062	1.344	1.021	1.771	0.03536
rs11056355	NA	12	0.7694	0.0008085	0.7942	0.6468	0.9752	0.02779	0.7391	0.5867	0.9312	0.01031
rs11056394	RERG	12	1.4549	0.00214	1.522	1.073	2.159	0.01853	1.398	1.007	1.942	0.04557
rs11056992	MGST1	12	0.7883	0.002988	0.7905	0.6384	0.9789	0.03116	0.7858	0.6235	0.9902	0.04097
rs11067083	TBX5	12	0.7419	0.004499	0.7043	0.5026	0.987	0.04174	0.7652	0.59	0.9925	0.04377
rs1106774	IMMP2L	7	1.2692	0.002155	1.244	1.011	1.531	0.03948	1.299	1.038	1.625	0.022
rs11071114	NA	15	1.2874	0.001434	1.28	1.036	1.583	0.02237	1.296	1.032	1.628	0.02582
rs11074561	GGA2	16	1.3369	0.002068	1.336	1.046	1.706	0.02026	1.338	1.01	1.774	0.04277
rs11074888	GSG1L	16	1.3336	0.0002492	1.296	1.051	1.598	0.01548	1.379	1.099	1.731	0.005489
rs11081501	RAB31	18	0.7254	0.003718	0.7395	0.5584	0.9792	0.03516	0.705	0.5011	0.9918	0.04473
rs11084609	NA	19	1.3916	0.0008179	1.393	1.069	1.816	0.01403	1.39	1.047	1.847	0.02285
rs11084701	NA	19	1.3624	0.0009617	1.338	1.039	1.723	0.02423	1.39	1.064	1.815	0.01558
rs11096482	SMC6	2	0.7538	0.001849	0.7478	0.5813	0.962	0.02371	0.7599	0.5911	0.9769	0.03219
rs11097022	NA	4	0.7443	0.003688	0.7673	0.5981	0.9845	0.03723	0.705	0.5056	0.9831	0.03936
rs11099459	BMP3	4	0.6404	0.0005228	0.6933	0.4948	0.9715	0.03334	0.5795	0.3969	0.846	0.004712
rs11100026	NA	4	0.7735	0.001352	0.7712	0.6257	0.9505	0.01486	0.7764	0.6118	0.9855	0.03749
rs11100561	NA	4	0.7968	0.005105	0.8068	0.651	0.9999	0.04986	0.7849	0.6195	0.9943	0.0447
rs11103033	NA	9	0.7159	9.122e-05	0.7553	0.6037	0.9448	0.01402	0.6691	0.5201	0.8607	0.001762
rs111063713	NA	14	0.7675	0.002478	0.7656	0.6019	0.9737	0.0295	0.7694	0.6026	0.9826	0.03564
rs111239123	NA	11	1.6919	0.000654	1.675	1.128	2.487	0.01051	1.716	1.073	2.745	0.0243
rs11126696	NA	2	0.7825	0.002037	0.8012	0.6516	0.9852	0.03561	0.7585	0.5984	0.9614	0.02231
rs11149155	NA	13	0.6378	0.009765	0.7397	0.5505	0.9938	0.0454	0.5199	0.3471	0.7788	0.00151
rs11149837	ZFHX3	16	0.7198	0.002013	0.7289	0.5483	0.9688	0.0294	0.7093	0.5218	0.9642	0.0283
rs111502204	NA	13	1.5513	0.002754	1.66	1.069	2.578	0.02395	1.475	1.009	2.157	0.04471
rs11159343	NRXN3	14	1.2979	0.002231	1.29	1.02	1.632	0.0333	1.306	1.029	1.657	0.02787
rs11159991	C14orf159	14	1.4007	0.001126	1.411	1.047	1.902	0.02369	1.392	1.056	1.835	0.01899
rs111607678	ZFPM2	8	0.7461	0.0003733	0.7245	0.5827	0.9007	0.003723	0.7732	0.608	0.9832	0.03592
rs11163211	NA	1	1.3804	5.044e-05	1.44	1.169	1.775	0.0006172	1.309	1.036	1.654	0.02431
rs1116383	NA	3	1.3346	0.0002604	1.29	1.041	1.598	0.01989	1.385	1.107	1.732	0.004403
rs11164288	RPAP2	1	1.2769	0.002312	1.249	1.01	1.544	0.03984	1.312	1.038	1.659	0.02311
rs11168332	NA	12	1.3561	0.0004559	1.367	1.076	1.736	0.01048	1.345	1.055	1.714	0.01656
rs111715668	NA	7	1.573	0.001333	1.482	1.013	2.17	0.04291	1.681	1.124	2.514	0.01139
rs111833202	NA	2	1.7356	4.519e-05	1.72	1.155	2.563	0.007671	1.748	1.227	2.492	0.001999
rs11187837	PLCE1	10	1.5109	0.001595	1.471	1.022	2.118	0.03776	1.551	1.081	2.224	0.0171
rs111962733	NA	18	0.6188	0.001218	0.536	0.3332	0.862	0.01009	0.6744	0.4668	0.9742	0.03579
rs11197441	ATRNL1	10	1.3802	0.001082	1.363	1.066	1.741	0.01334	1.409	1.029	1.93	0.03248
rs11205499	NA	1	1.488	0.0002333	1.462	1.091	1.958	0.01104	1.517	1.117	2.062	0.007674
rs11205609	AGBL4	1	0.7752	0.001264	0.8098	0.6595	0.9943	0.04391	0.7318	0.5781	0.9263	0.009423
rs11205641	AGBL4	1	0.7951	0.003545	0.8074	0.6574	0.9915	0.04125	0.7796	0.6176	0.9841	0.03618
rs112209555	NA	3	0.5721	0.0008701	0.4733	0.2955	0.7579	0.001848	0.6636	0.4404	0.9999	0.04995
rs11221197	NA	11	1.6101	0.002346	1.481	1.002	2.188	0.04866	1.843	1.122	3.027	0.01578
rs11226249	NA	11	1.5881	0.0007243	1.529	1.061	2.203	0.0228	1.66	1.119	2.464	0.01185
rs11226265	NA	11	1.565	0.0008785	1.538	1.073	2.204	0.01919	1.597	1.084	2.354	0.01799
rs11226273	NA	11	1.6042	0.0006247	1.554	1.075	2.247	0.01904	1.665	1.117	2.481	0.01232
rs1122944	NCOA3	20	1.34	0.0002135	1.409	1.137	1.745	0.001701	1.268	1.013	1.587	0.03848
rs11232450	NA	11	0.7437	0.001437	0.7297	0.5665	0.94	0.01473	0.759	0.584	0.9864	0.03915
rs11243168	NA	6	0.7922	0.003462	0.8003	0.6496	0.986	0.03639	0.782	0.618	0.9895	0.04058
rs112457959	NA	11	1.6758	0.0007914	1.675	1.128	2.487	0.01051	1.677	1.051	2.674	0.02999
rs112679425	SLC2A11	22	0.6047	0.001347	0.5914	0.3643	0.9601	0.03361	0.6138	0.4122	0.9139	0.01624
rs112719410	NA	8	1.5157	0.002361	1.489	1.044	2.123	0.02804	1.552	1.031	2.336	0.03527
rs112812497	SPATA6	1	1.5703	0.00129	1.632	1.117	2.385	0.0114	1.505	1.01	2.241	0.04457
rs112831162	NA	19	1.3905	0.0008412	1.391	1.068	1.813	0.0144	1.39	1.047	1.847	0.02285
rs112992598	NA	11	1.555	0.001019	1.506	1.048	2.164	0.0267	1.612	1.098	2.366	0.01471
rs113091665	AGBL4	1	0.7994	0.004374	0.8119	0.6608	0.9976	0.04742	0.7838	0.6216	0.9884	0.03956
rs113292384	FSTL5	4	0.5886	6.113e-05	0.5625	0.3938	0.8034	0.001558	0.6192	0.4245	0.9031	0.01281
rs113792781	NA	19	1.3764	0.001178	1.358	1.044	1.768	0.02258	1.398	1.053	1.857	0.02064
rs114348846	KIF1A	2	1.4622	0.0006847	1.479	1.083	2.021	0.01397	1.446	1.062	1.968	0.01905
rs114905042	NA	2	1.7312	0.0005783	1.532	1.028	2.282	0.03602	2.104	1.272	3.482	0.003785
rs114917941	NA	12	0.5647	0.00124	0.5794	0.3565	0.9417	0.02764	0.5499	0.3351	0.9024	0.01797
rs114932947	FSTL5	4	1.5258	0.003332	1.496	1.041	2.148	0.0293	1.573	1.003	2.467	0.04864
rs114939697	ARHGEF3	3	1.6414	0.0004077	1.897	1.312	2.743	0.0006677	1.433	1.004	2.045	0.04723
rs1149750	NA	10	0.6614	0.001809	0.7008	0.5007	0.9808	0.03816	0.6071	0.4033	0.9139	0.01678
rs1149751	NA	10	0.6032	0.0004899	0.6453	0.4418	0.9426	0.02346	0.553	0.3598	0.8499	0.006894
rs1149753	NA	10	0.6076	0.0005914	0.6453	0.4418	0.9426	0.02346	0.5622	0.3657	0.8643	0.008681
rs1150605	PHACTR1	6	1.3156	0.0006376	1.336	1.079	1.656	0.00799	1.292	1.024	1.63	0.03045
rs1152534	NA	14	0.7506	0.003178	0.777	0.6055	0.997	0.04731	0.7151	0.5322	0.961	0.02615
rs1157336	NA	22	0.7461	0.0003255	0.7837	0.6343	0.9683	0.02392	0.6988	0.5476	0.8917	0.003962
rs11574765	IL6ST	5	1.5181	0.001168	1.543	1.102	2.16	0.01159	1.487	1.017	2.175	0.04056
rs11583504	AGBL4	1	0.7926	0.00305	0.8074	0.6574	0.9915	0.04125	0.774	0.6137	0.9762	0.03052
rs1158384	NA	19	1.3821	0.001023	1.391	1.068	1.813	0.01446	1.372	1.034	1.819	0.02814
rs11586367	PLXNA2	1	0.723	0.001026	0.7158	0.5489	0.9333	0.01352	0.7312	0.5509	0.9705	0.03019
rs11590625	NA	1	1.5224	0.001665	1.54	1.051	2.257	0.02685	1.507	1.052	2.159	0.02538
rs11603813	NA	11	1.5793	2.048e-05	1.604	1.221	2.108	0.0006897	1.544	1.111	2.147	0.009782
rs11615107	SLCO1B1	12	0.565	0.0006247	0.5045	0.3152	0.8075	0.004364	0.6282	0.3985	0.9905	0.04537
rs11621665	NPAS3	14	0.6272	0.002624	0.6484	0.4375	0.961	0.03091	0.5972	0.3701	0.9636	0.03468
rs11623599	SUPT16H	14	0.7219	0.003363	0.7585	0.5761	0.9986	0.04888	0.6643	0.465	0.9491	0.02464
rs11625540	NA	14	1.6651	0.0002567	1.644	1.124	2.406	0.01037	1.688	1.139	2.501	0.009088
rs1162678187	NA	10	0.7181	0.0003558	0.6975	0.5396	0.9017	0.005964	0.7394	0.5716	0.9565	0.02154
rs11652445	RP11-81A22.5	17	0.6605	0.001221	0.6645	0.483	0.9141	0.01202	0.6539	0.4347	0.9836	0.04139
rs11654312	CHRNE	17	0.7	0.004046	0.7438	0.5605	0.9869	0.04021	0.5892	0.3658	0.9488	0.02955
rs116566410	CD53	1	1.4827	0.001203	1.44	1.039	1.997	0.02854	1.533	1.082	2.173	0.01637
rs11658601	NA	17	0.7982	0.00359	0.8146	0.6638	0.9996	0.0495	0.7787	0.6212	0.9761	0.03005
rs11659937	NA	18	0.5849	0.0004963	0.5337	0.3478	0.8191	0.004062	0.6402	0.4184	0.9797	0.03993
rs11662020	GATA6	18	1.6664	0.000187	1.76	1.206	2.568	0.003399	1.577	1.079	2.305	0.01876
rs11664458	TMEM241	18	0.7875	0.002014	0.7877	0.639	0.9709	0.02532	0.7873	0.6317	0.9811	0.03318
rs11666017	NA	19	1.3673	0.001604	1.365	1.047	1.779	0.02158	1.37	1.03	1.822	0.03068
rs11668562	ZNF761	19	1.3468	0.0002278	1.346	1.093	1.657	0.005159	1.348	1.056	1.72	0.01668
rs11669921	NA	19	1.391	0.0008992	1.399	1.071	1.827	0.01365	1.382	1.04	1.838	0.02591
rs11670092	NA	19	1.3933	0.0007641	1.376	1.055	1.795	0.01846	1.413	1.066	1.871	0.01604
rs11672212	SLC27A5	19	0.6141	0.001895	0.6507	0.4355	0.9723	0.03597	0.5655	0.3503	0.9127	0.0196
rs116754552	DIS3L2	2	0.6099	0.0008541	0.5904	0.3933	0.8862	0.01099	0.631	0.4163	0.9564	0.03
rs116781913	NA	4	1.6273	0.00217	1.554	1.015	2.381	0.04269	1.715	1.088	2.704	0.02023
rs11683557	NA	2	0.7807	0.001727	0.7842	0.6385	0.9631	0.02041	0.7762	0.6132	0.9825	0.03513
rs11693704	NA	2	0.7886	0.003015	0.801	0.6488	0.9889	0.03904	0.7734	0.6113	0.9786	0.03233
rs116940741	NA	7	1.4428	0.002211	1.464	1.046	2.05	0.02644	1.423	1.025	1.974	0.0349
rs11694952	STON1-GTF2A1L	2	1.3675	0.00131	1.339	1.042	1.719	0.02251	1.408	1.048	1.89	0.02301
rs11696108	NA	2	0.6092	0.0002715	0.627	0.4555	0.8632	0.004203	0.5702	0.3513	0.9254	0.02299
rs11700863	NA	21	1.3981	0.002205	1.385	1.05	1.826	0.02117	1.418	1.009	1.991	0.04398
rs11718331	NA	3	1.3319	0.0002859	1.278	1.031	1.584	0.02496	1.393	1.114	1.742	0.003704
rs117198597	NA	4	1.5755	0.002705	1.48	1.007	2.175	0.04609	1.727	1.083	2.754	0.02177
rs11727823	NA	4	1.4207	0.000957	1.479	1.094	1.997	0.01084	1.369	1.025	1.827	0.03318
rs11739853	IL6ST	5	1.5181	0.001168	1.543	1.102	2.16	0.01159	1.487	1.017	2.175	0.04056
rs117445826	CATSPERB	14	1.8746	1.344e-05	1.674	1.148	2.441	0.007404	2.169	1.414	3.328	0.000392
rs11747625	IL6ST	5	1.5181	0.001168	1.543	1.102	2.16	0.01159	1.487	1.017	2.175	0.04056
rs11752176	NA	6	0.6149	0.003304	0.6147	0.3792	0.9964	0.04832	0.615	0.3969	0.953	0.02959
rs11757165	NA	6	0.7351	7.883e-05	0.7034	0.5699	0.8682	0.001053	0.7721	0.6183	0.964	0.02242
rs117722003	NA	6	0.66	0.004356	0.6349	0.408	0.9879	0.04402	0.6786	0.4668	0.9865	0.04223
rs11774279	NA	8	0.7762	0.002457	0.7751	0.6204	0.9685	0.02495	0.7774	0.6101	0.9906	0.04171
rs11780104	PTK2	8	0.7869	0.003179	0.8001	0.6458	0.9913	0.04135	0.7708	0.6074	0.9782	0.03222
rs11791051	NA	9	1.4728	0.0007251	1.462	1.116	1.916	0.005864	1.497	1	2.241	0.04974
rs11792350	NA	9	1.4213	0.00107	1.435	1.07	1.925	0.01589	1.407	1.04	1.904	0.02682
rs1181174	NDC1	1	0.7067	0.0008331	0.7414	0.5526	0.9946	0.04596	0.6761	0.5098	0.8968	0.006609
rs11817730	HOGA1	10	0.7091	0.001284	0.6858	0.5117	0.919	0.01154	0.7342	0.5443	0.9905	0.04311
rs11845070	MDGA2	14	1.3307	0.0006825	1.38	1.101	1.73	0.005266	1.277	1.004	1.625	0.04668
rs11847580	NA	14	1.4997	0.003757	1.529	1.034	2.262	0.03343	1.472	1.003	2.161	0.04832
rs11848014	NA	14	1.6001	0.0008258	1.527	1.039	2.243	0.03105	1.681	1.133	2.495	0.009918
rs11852401	NA	15	0.646	1.155e-06	0.6207	0.4955	0.7776	3.364e-05	0.6878	0.5187	0.9119	0.009303
rs11854583	NA	15	0.6948	0.0004003	0.7026	0.5342	0.9241	0.01159	0.6857	0.5091	0.9236	0.01302
rs11854891	LRRK1	15	1.5279	8.986e-05	1.546	1.158	2.064	0.003131	1.507	1.103	2.058	0.01008
rs11881009	NA	19	1.3864	0.00188	1.381	1.034	1.843	0.02871	1.392	1.038	1.867	0.02729
rs1189829	NA	14	0.7661	0.0008346	0.8095	0.6565	0.9981	0.04798	0.7148	0.5652	0.9039	0.005056
rs1189836	NA	14	0.7685	0.0009425	0.8047	0.6518	0.9936	0.04338	0.7267	0.576	0.9167	0.007062
rs11902516	DIS3L2	2	0.6009	0.0005465	0.5567	0.3709	0.8356	0.004699	0.6498	0.431	0.9796	0.03958
rs11904384	DIS3L2	2	0.5941	0.0006614	0.5842	0.3871	0.8818	0.0105	0.6055	0.391	0.9375	0.02449
rs11919383	PIK3CA	3	0.7258	0.001548	0.7437	0.5634	0.9817	0.03657	0.7076	0.5329	0.9396	0.01682
rs11934871	C4orf40	4	0.7546	0.0009275	0.7961	0.6367	0.9955	0.04551	0.7057	0.5495	0.9063	0.006314
rs11945628	NA	4	0.7337	0.002228	0.7607	0.5937	0.9746	0.03052	0.6878	0.4938	0.9579	0.02679
rs11947998	NA	5	0.7737	0.001371	0.8068	0.653	0.9968	0.0466	0.7349	0.5812	0.9291	0.01005
rs12000794	NA	9	1.3803	0.001952	1.329	1.007	1.753	0.04478	1.443	1.068	1.949	0.01683
rs12030579	AGBL4	1	0.7879	0.00259	0.8096	0.6592	0.9944	0.04403	0.7602	0.6004	0.9627	0.02286
rs12039592	AGBL4	1	0.8005	0.004663	0.8114	0.6601	0.9974	0.04723	0.7869	0.6241	0.9922	0.04271
rs12047155	AGBL4	1	0.7978	0.004151	0.8115	0.6599	0.9978	0.04758	0.7809	0.6191	0.985	0.03686
rs12076934	RYR2	1	0.7755	0.001168	0.801	0.651	0.9856	0.03598	0.7456	0.5934	0.9369	0.01176
rs12079898	NA	1	1.8603	4.671e-05	1.905	1.318	2.754	0.0006005	1.777	1.066	2.963	0.02747
rs12082367	NA	1	1.3446	0.0003002	1.325	1.071	1.638	0.009496	1.371	1.073	1.752	0.01159
rs12082939	PRKCZ	1	0.7823	0.001858	0.7969	0.6469	0.9818	0.03298	0.7648	0.6074	0.9629	0.02253
rs12111472	PDE10A	6	0.6036	0.003443	0.6009	0.364	0.9921	0.04647	0.6059	0.3832	0.9581	0.03212
rs12128434	SPATA6	1	1.5659	0.001443	1.624	1.108	2.38	0.01292	1.505	1.01	2.241	0.04457
rs12128930	SPATA6	1	1.5753	0.001256	1.643	1.12	2.409	0.01103	1.505	1.01	2.241	0.04457
rs12137230	SPATA6	1	1.5659	0.001443	1.624	1.108	2.38	0.01292	1.505	1.01	2.241	0.04457
rs12138443	NA	1	1.5753	0.001256	1.643	1.12	2.409	0.01103	1.505	1.01	2.241	0.04457
rs12139933	SPATA6	1	1.5065	0.003945	1.508	1.022	2.227	0.03871	1.505	1.01	2.241	0.04457
rs12142908	SPATA6	1	1.5389	0.002273	1.584	1.078	2.328	0.01905	1.492	1.002	2.223	0.04909
rs12143166	PLA2G4A	1	0.7111	0.000982	0.6434	0.5188	0.798	5.953e-05	0.7914	0.6301	0.9939	0.04416
rs12144342	SPATA6	1	1.5659	0.001443	1.624	1.108	2.38	0.01292	1.505	1.01	2.241	0.04457
rs12144441	SPATA6	1	1.5659	0.001443	1.624	1.108	2.38	0.01292	1.505	1.01	2.241	0.04457
rs12150404	SHISA6	17	1.4692	0.004053	1.456	1.001	2.119	0.04957	1.482	1.027	2.14	0.03562
rs12200865	RIOK1	6	0.7842	0.002401	0.79	0.6411	0.9735	0.02698	0.7768	0.6125	0.9852	0.03727
rs12212583	NA	6	1.373	0.0001567	1.462	1.162	1.841	0.001213	1.286	1.017	1.627	0.03559
rs12223069	NA	11	1.5154	0.001854	1.533	1.064	2.209	0.02192	1.497	1.029	2.178	0.03503
rs12223884	NA	11	1.5655	0.0008746	1.543	1.076	2.212	0.01831	1.592	1.08	2.346	0.01888
rs1223512	NA	6	0.723	6.526e-05	0.6839	0.5505	0.8497	0.000602	0.7714	0.6102	0.9752	0.03003
rs12332370	NA	5	1.3263	0.001717	1.269	1.02	1.579	0.03254	1.441	1.068	1.944	0.01678
rs12372293	ALDH1L2	12	1.4866	0.002482	1.447	1.03	2.034	0.03315	1.541	1.041	2.281	0.03055
rs12408811	AGBL4	1	0.7717	0.001	0.8086	0.6591	0.9921	0.04174	0.7252	0.573	0.9178	0.007511
rs12410172	AGBL4	1	0.7753	0.001259	0.8106	0.6606	0.9947	0.04434	0.7307	0.577	0.9254	0.009219
rs12416903	B3GAT1	11	1.4916	0.0004266	1.542	1.111	2.14	0.009695	1.45	1.071	1.963	0.01616
rs12419477	NA	11	0.6226	0.0004702	0.6814	0.5147	0.9022	0.007386	0.508	0.3226	0.8001	0.003474
rs12428871	MYO16	13	1.3699	0.002222	1.387	1.051	1.831	0.02072	1.351	1.007	1.812	0.04491
rs12430791	NA	13	0.7408	0.000196	0.722	0.5804	0.898	0.003429	0.762	0.6061	0.9581	0.02002
rs12434738	RPS6KA5	14	0.6187	0.0003015	0.6361	0.4324	0.9358	0.02164	0.6046	0.4249	0.8603	0.00517
rs1243621	NA	14	1.3437	0.002015	1.275	1.012	1.605	0.03915	1.489	1.078	2.055	0.01559
rs12436613	MDGA2	14	1.5698	0.001005	1.539	1.066	2.222	0.02135	1.606	1.083	2.381	0.01851
rs12444488	GSG1L	16	1.3249	0.0003455	1.29	1.045	1.591	0.01756	1.367	1.089	1.715	0.006953
rs12450778	NA	17	1.5866	0.0005161	1.638	1.169	2.296	0.00418	1.514	1.005	2.28	0.04737
rs12460677	NA	19	1.3836	0.001021	1.391	1.068	1.813	0.0144	1.375	1.034	1.827	0.02829
rs12463417	DIS3L2	2	0.6105	0.0007447	0.5606	0.3735	0.8415	0.005222	0.6645	0.4432	0.9965	0.04806
rs12464867	NA	2	0.7234	0.001121	0.7117	0.5459	0.9279	0.01197	0.7374	0.5534	0.9826	0.03753
rs12465686	SH2D6	2	1.4263	0.0009718	1.363	1.037	1.79	0.02626	1.526	1.094	2.128	0.01288
rs12472879	LRP1B	2	0.6743	0.002178	0.6948	0.4918	0.9815	0.03885	0.6518	0.451	0.942	0.02271
rs12489928	NA	3	0.747	0.0008561	0.8087	0.6551	0.9985	0.04835	0.6783	0.5354	0.8592	0.001292
rs12492144	NA	3	0.666	0.003401	0.682	0.4789	0.9712	0.03382	0.6436	0.4205	0.9848	0.04233
rs12492844	NA	3	1.2576	0.003822	1.241	1.006	1.531	0.04391	1.278	1.014	1.61	0.03736
rs12512227	NA	4	1.3519	0.001924	1.34	1.042	1.725	0.02274	1.368	1.023	1.83	0.03482
rs12519165	NA	5	1.3234	0.000473	1.291	1.05	1.587	0.01554	1.369	1.075	1.743	0.01078
rs12522047	NA	5	1.3219	0.002822	1.299	1.024	1.648	0.0311	1.356	1.018	1.807	0.03737
rs12529659	PACRG	6	0.5947	0.0004443	0.5108	0.3159	0.8259	0.006143	0.6489	0.451	0.9337	0.01983
rs1253941	NA	10	1.39	0.002458	1.438	1.058	1.956	0.02048	1.347	1.002	1.81	0.04822
rs12540872	HDAC9	7	0.7809	0.0021	0.7918	0.6434	0.9745	0.02756	0.7664	0.6016	0.9763	0.03123
rs12554151	NFIB	9	0.7579	0.003567	0.7818	0.6154	0.9932	0.0438	0.7223	0.5364	0.9727	0.03218
rs12584688	NA	13	1.4242	0.004001	1.344	1.007	1.793	0.0444	1.629	1.051	2.527	0.0292
rs12590018	RPS6KA5	14	0.6216	0.0002717	0.6357	0.4321	0.9352	0.02145	0.6108	0.434	0.8596	0.004693
rs12590633	MDGA2	14	1.2785	0.002784	1.266	1.02	1.572	0.03269	1.294	1.017	1.646	0.03587
rs12608315	TMEM241	18	1.3673	0.0003868	1.411	1.094	1.82	0.00795	1.331	1.052	1.684	0.01732
rs12611152	NA	19	1.3582	0.001478	1.355	1.047	1.752	0.02086	1.362	1.032	1.797	0.02933
rs12617168	NA	2	1.3646	0.0009808	1.368	1.073	1.743	0.01131	1.36	1.022	1.81	0.03492
rs12635345	NA	3	0.6429	0.001187	0.6425	0.4559	0.9055	0.0115	0.6436	0.4205	0.9848	0.04233
rs12640941	NA	4	0.7418	0.003096	0.783	0.6152	0.9965	0.04678	0.6636	0.4694	0.9381	0.02024
rs12641537	NA	4	1.6857	0.0007908	1.513	1.024	2.233	0.03739	2	1.225	3.265	0.005556
rs12642628	NA	4	0.7322	0.002147	0.7607	0.5937	0.9746	0.03052	0.6833	0.4894	0.9541	0.02536
rs12671443	NA	7	1.4392	0.004749	1.445	1.001	2.086	0.04955	1.434	1.013	2.032	0.0423
rs12675362	SGCZ	8	1.3457	0.001185	1.268	1.014	1.587	0.03768	1.497	1.109	2.02	0.008368
rs12685966	NA	9	1.3463	0.001597	1.326	1.059	1.661	0.01404	1.389	1.005	1.918	0.04645
rs12698334	NA	7	0.762	0.0005156	0.7954	0.6439	0.9826	0.03376	0.7265	0.5813	0.908	0.004986
rs12720020	PRKAR1B	7	1.2853	0.00179	1.259	1.011	1.567	0.03937	1.314	1.047	1.648	0.01828
rs12724511	AGBL4	1	0.7787	0.001527	0.814	0.6635	0.9986	0.04845	0.7338	0.5792	0.9296	0.01034
rs12725998	AGBL4	1	0.8006	0.004666	0.8114	0.6601	0.9974	0.04723	0.7871	0.6243	0.9923	0.04284
rs12735035	AGBL4	1	0.7921	0.00298	0.8097	0.6595	0.9942	0.0439	0.7702	0.6105	0.9717	0.02763
rs12735833	AGBL4	1	0.7862	0.002172	0.8074	0.6574	0.9915	0.04125	0.7601	0.6028	0.9584	0.02041
rs12747458	PLXNA2	1	0.7157	0.001483	0.7085	0.5345	0.9393	0.0166	0.7242	0.5351	0.9801	0.03662
rs12749322	NA	1	1.4593	0.0002322	1.462	1.115	1.917	0.005999	1.456	1.078	1.967	0.01429
rs12755874	NA	1	0.7621	0.001559	0.7353	0.5771	0.9369	0.01288	0.788	0.6236	0.9959	0.04609
rs12758298	AGBL4	1	0.7886	0.002762	0.7963	0.6466	0.9808	0.03215	0.7791	0.6168	0.9841	0.03619
rs12766391	NA	10	1.3024	0.003229	1.306	1.017	1.679	0.03672	1.299	1.015	1.663	0.03777
rs12778246	JAKMIP3	10	0.7207	7.565e-05	0.7319	0.5829	0.919	0.007194	0.7093	0.5629	0.8937	0.003588
rs12790940	DDX10	11	0.6835	0.004596	0.6804	0.467	0.9912	0.04487	0.6864	0.4749	0.992	0.04519
rs12823194	NA	12	0.6848	0.003444	0.6522	0.432	0.9847	0.04203	0.7055	0.5112	0.9735	0.03373
rs1283923	NA	6	1.2787	0.002638	1.254	1.014	1.551	0.0367	1.312	1.028	1.675	0.02903
rs1284864	NA	1	0.6037	0.0008532	0.5604	0.3302	0.9512	0.03194	0.6246	0.4365	0.8937	0.01003
rs1286080	RPS6KA5	14	1.3121	0.001327	1.282	1.027	1.599	0.02779	1.352	1.052	1.738	0.01833
rs1286115	RPS6KA5	14	1.2754	0.004037	1.267	1.014	1.583	0.03733	1.286	1.003	1.649	0.04759
rs1286118	RPS6KA5	14	1.2763	0.004015	1.267	1.014	1.583	0.03733	1.288	1.004	1.653	0.04678
rs1286129	RPS6KA5	14	1.2941	0.004209	1.278	1.004	1.626	0.04663	1.313	1.013	1.701	0.03956
rs1286132	RPS6KA5	14	1.2941	0.004209	1.278	1.004	1.626	0.04663	1.313	1.013	1.701	0.03956
rs1286144	RPS6KA5	14	1.2842	0.002895	1.265	1.015	1.576	0.03609	1.309	1.021	1.677	0.03363
rs12864681	NA	13	0.6839	0.004593	0.6307	0.4053	0.9817	0.04116	0.7148	0.5157	0.9907	0.04383
rs12873753	NA	13	0.6729	0.001708	0.6157	0.4036	0.9395	0.02447	0.7049	0.5195	0.9566	0.02478
rs12875415	NA	13	1.5426	0.003104	1.638	1.055	2.541	0.02783	1.475	1.009	2.157	0.04471
rs1288476	LRP8	1	0.702	5.367e-05	0.7054	0.5587	0.8905	0.003339	0.6979	0.5413	0.8997	0.005508
rs1288523	LRP8	1	0.7725	0.00253	0.7632	0.602	0.9676	0.02564	0.7818	0.6171	0.9904	0.0414
rs12886872	C14orf159	14	1.2887	0.001336	1.299	1.055	1.599	0.01387	1.276	1.011	1.609	0.03976
rs12888621	AKAP6	14	0.7461	0.0006516	0.732	0.5822	0.9203	0.007556	0.7631	0.5952	0.9783	0.03289
rs12894403	C14orf159	14	1.2856	0.001493	1.299	1.055	1.599	0.01387	1.269	1.006	1.601	0.04461
rs1290354	FAM210A	18	1.5132	0.004264	1.483	1.017	2.161	0.04048	1.554	1.008	2.394	0.04595
rs1294053	SPSB1	1	1.344	0.0002566	1.291	1.046	1.594	0.01745	1.416	1.114	1.801	0.004526
rs12957440	TMEM241	18	1.3154	0.002363	1.351	1.038	1.759	0.02512	1.287	1.015	1.633	0.03763
rs1296074	SPSB1	1	1.3275	0.0006124	1.278	1.031	1.584	0.02491	1.396	1.09	1.787	0.008212
rs1296092	RPS6KA5	14	1.2733	0.004515	1.262	1.007	1.581	0.04374	1.287	1.005	1.648	0.04584
rs12966237	TMEM241	18	1.3638	0.000417	1.411	1.094	1.82	0.00795	1.325	1.048	1.674	0.01868
rs12974453	PTPRS	19	1.3801	0.0004312	1.395	1.107	1.758	0.004757	1.358	1.022	1.804	0.035
rs12975852	NA	19	1.3668	0.00122	1.359	1.05	1.759	0.01971	1.376	1.041	1.819	0.02473
rs12983265	NA	19	1.5028	0.001319	1.543	1.064	2.238	0.02217	1.471	1.053	2.055	0.02378
rs12992815	LCT	2	1.4348	0.0001061	1.447	1.16	1.805	0.001049	1.409	1.019	1.947	0.03796
rs13011849	EML6	2	1.3501	0.0001384	1.384	1.126	1.7	0.002017	1.308	1.036	1.651	0.02385
rs13048056	MX2	21	0.6059	0.0008487	0.6192	0.4105	0.934	0.02227	0.5923	0.3885	0.9029	0.01491
rs13061523	NA	3	1.7015	0.0004663	1.73	1.149	2.606	0.008699	1.67	1.083	2.577	0.02041
rs13065946	NA	3	1.3304	0.0003867	1.309	1.06	1.617	0.01239	1.358	1.071	1.722	0.01143
rs13066305	NA	3	1.5335	0.005153	1.518	1.005	2.294	0.04722	1.551	1.003	2.398	0.04842
rs13071996	NA	3	1.2896	0.001313	1.302	1.051	1.613	0.01563	1.276	1.019	1.598	0.03388
rs13076500	NA	3	1.2637	0.003294	1.256	1.022	1.544	0.03025	1.274	1.004	1.617	0.04665
rs13099887	NA	3	1.5759	0.001491	1.611	1.091	2.379	0.01657	1.539	1.027	2.306	0.03668
rs13102848	NA	4	0.7002	0.002084	0.732	0.5447	0.9837	0.03852	0.6568	0.4608	0.9361	0.02006
rs13113071	NA	4	0.7456	0.004389	0.7669	0.5988	0.9821	0.03549	0.7046	0.4965	0.9999	0.04994
rs13117816	NA	4	1.4214	0.0008113	1.375	1.06	1.785	0.01653	1.502	1.074	2.102	0.01748
rs13128384	NA	4	0.6852	0.000786	0.7253	0.543	0.9686	0.02957	0.6331	0.4501	0.8905	0.008637
rs13129383	NA	4	1.6313	0.0003467	1.565	1.04	2.356	0.03188	1.683	1.18	2.399	0.004059
rs13134840	NA	4	0.7505	0.005085	0.7807	0.6108	0.9978	0.04797	0.6927	0.4884	0.9824	0.03947
rs13138060	NA	4	0.6805	0.0006232	0.7167	0.5368	0.9568	0.02384	0.6331	0.4501	0.8905	0.008637
rs13140776	NA	4	0.6834	0.0007241	0.722	0.5406	0.9644	0.02743	0.6331	0.4501	0.8905	0.008637
rs13170520	IL6ST	5	1.5181	0.001168	1.543	1.102	2.16	0.01159	1.487	1.017	2.175	0.04056
rs13207769	QKI	6	1.5633	0.0004415	1.573	1.14	2.172	0.005848	1.549	1.046	2.294	0.02898
rs1323707	NA	13	0.7666	0.001152	0.7514	0.6032	0.936	0.01077	0.7843	0.6206	0.9913	0.04208
rs13272780	NA	8	1.3468	0.0002091	1.365	1.104	1.688	0.00408	1.325	1.048	1.675	0.01883
rs13284318	FRMPD1	9	1.2898	0.0009917	1.285	1.05	1.574	0.01513	1.296	1.031	1.628	0.02622
rs13318801	EPHA6	3	0.6002	0.003393	0.6176	0.3852	0.9902	0.04542	0.5816	0.3547	0.9537	0.03173
rs13326358	ROBO2	3	1.5107	0.002559	1.481	1.022	2.147	0.03779	1.544	1.047	2.276	0.02825
rs13357144	NA	5	0.6388	0.00115	0.6282	0.421	0.9374	0.02282	0.6479	0.4493	0.9343	0.02015
rs13389076	ABCB11	2	0.6312	0.001788	0.677	0.4817	0.9514	0.02463	0.5269	0.3052	0.9098	0.02149
rs1340523	SSX2IP	1	0.7693	0.001199	0.7639	0.6177	0.9445	0.01288	0.7761	0.611	0.9857	0.03773
rs13410536	NA	2	1.5438	0.002128	1.535	1.041	2.263	0.03046	1.553	1.046	2.307	0.02919
rs13412392	DIS3L2	2	0.655	0.0002757	0.646	0.4724	0.8833	0.006193	0.6654	0.4769	0.9284	0.01651
rs13416596	DIS3L2	2	0.6266	0.0001055	0.5919	0.4252	0.8241	0.001895	0.6649	0.4744	0.9319	0.0178
rs1343162	AGBL4	1	0.7862	0.002167	0.8074	0.6574	0.9915	0.04125	0.76	0.6028	0.9583	0.02032
rs1343165	AGBL4	1	0.7874	0.002558	0.8085	0.6578	0.9937	0.04335	0.7607	0.6007	0.9631	0.02308
rs13434711	PPARGC1A	4	0.7871	0.002364	0.7903	0.6419	0.9731	0.02666	0.7833	0.6224	0.9857	0.03725
rs1352381	NA	6	0.739	0.0001153	0.7005	0.5672	0.8652	0.0009558	0.7848	0.6272	0.9821	0.03415
rs1357417	NA	12	0.7993	0.003146	0.8191	0.6719	0.9987	0.04853	0.7746	0.6186	0.9698	0.02595
rs138521705	SRRM4	12	0.4934	0.003995	0.3708	0.1994	0.6897	0.001728	0.6092	0.3724	0.9964	0.04835
rs1386917	NA	6	0.7536	0.0003321	0.7466	0.603	0.9243	0.007306	0.7614	0.6088	0.9522	0.01687
rs1390186	PTPRB	12	1.3089	0.002445	1.295	1.038	1.615	0.02192	1.332	1.004	1.767	0.04695
rs140141827	MINK1	17	0.682	0.005598	0.7467	0.5597	0.9962	0.04703	0.5525	0.3449	0.8851	0.0136
rs1402266	NA	3	0.728	7.188e-05	0.7825	0.6333	0.9667	0.02296	0.6667	0.5279	0.842	0.000666
rs140263220	NA	19	1.3759	0.00137	1.375	1.052	1.799	0.01994	1.377	1.035	1.832	0.02786
rs140281587	NA	4	1.5472	0.001706	1.466	1.025	2.098	0.03635	1.666	1.095	2.536	0.01723
rs141227472	CLASP2	3	1.4302	0.002573	1.355	1.008	1.821	0.04379	1.562	1.071	2.279	0.0206
rs1415985	AGBL4	1	0.7934	0.003148	0.8074	0.6574	0.9915	0.04125	0.7759	0.6156	0.978	0.03167
rs1416095	NA	1	0.7654	0.001844	0.7715	0.6117	0.9729	0.02839	0.7588	0.5944	0.9686	0.02666
rs141652167	ATG10	5	0.5522	0.009187	0.4125	0.2232	0.7624	0.004716	0.6599	0.4355	0.9997	0.04983
rs1417734	NA	13	0.7369	0.0007237	0.735	0.5755	0.9388	0.01367	0.7389	0.5718	0.9549	0.02074
rs1420742	BTBD11	12	1.4434	0.003425	1.401	1.018	1.929	0.03849	1.507	1.026	2.213	0.03656
rs142165483	NA	3	0.7016	0.0003532	0.7195	0.5607	0.9233	0.009691	0.6748	0.4947	0.9205	0.01304
rs142393924	MDGA2	14	1.5228	0.002035	1.527	1.059	2.201	0.0234	1.518	1.027	2.244	0.03637
rs142995009	NA	2	1.5953	0.002381	1.526	1.018	2.288	0.04064	1.686	1.073	2.648	0.02334
rs1434087	OSBPL6	2	1.5203	0.001897	1.548	1.081	2.217	0.01697	1.488	1.007	2.2	0.04607
rs1439281	NA	4	1.6822	0.0002195	1.533	1.059	2.219	0.02359	1.89	1.249	2.859	0.002594
rs144361977	NA	1	1.5659	0.001443	1.624	1.108	2.38	0.01292	1.505	1.01	2.241	0.04457
rs1448113	ST6GAL2	2	0.6751	0.001389	0.6664	0.4685	0.9477	0.02389	0.6829	0.4909	0.95	0.02353
rs144920858	MINK1	17	0.6905	0.003197	0.7424	0.5564	0.9906	0.04295	0.5684	0.3544	0.9117	0.01911
rs1449266	NA	15	0.6927	6.456e-05	0.6714	0.5316	0.8479	0.0008224	0.7252	0.5464	0.9626	0.02615
rs1449269	NA	15	0.6927	6.456e-05	0.6714	0.5316	0.8479	0.0008224	0.7252	0.5464	0.9626	0.02615
rs1452338	LINGO2	9	0.7555	0.0003873	0.8035	0.6543	0.9866	0.03676	0.6968	0.5506	0.8818	0.002637
rs1454599	NA	4	0.7467	0.003782	0.783	0.6152	0.9965	0.04678	0.6778	0.4801	0.9568	0.02704
rs146406980	NA	13	1.4644	0.002833	1.405	1.054	1.872	0.02045	1.669	1.002	2.782	0.04928
rs1471045	GUCY1A2	11	1.3245	0.000516	1.248	1.005	1.55	0.0452	1.418	1.124	1.789	0.003244
rs1473040	XIRP2	2	1.3135	0.0006836	1.345	1.091	1.659	0.005561	1.274	1.004	1.617	0.04608
rs1474611	NA	6	0.7664	0.004067	0.7857	0.6185	0.998	0.0481	0.741	0.5609	0.9789	0.03485
rs1478014	SGCZ	8	1.3048	0.0007502	1.236	1.005	1.52	0.04473	1.398	1.107	1.765	0.004884
rs1478173	NA	3	1.4458	0.002155	1.434	1.004	2.049	0.04756	1.455	1.064	1.992	0.01903
rs148189905	NA	1	1.5753	0.001256	1.643	1.12	2.409	0.01103	1.505	1.01	2.241	0.04457
rs1483469	NA	3	1.5809	0.0006262	1.52	1.033	2.237	0.03349	1.635	1.144	2.339	0.007026
rs1483552	FSTL5	4	0.5857	5.019e-05	0.5437	0.3789	0.7801	0.0009401	0.6334	0.4372	0.9176	0.01575
rs1488321	NA	6	0.7311	6.865e-05	0.7021	0.5684	0.8673	0.001034	0.7656	0.6111	0.9593	0.02029
rs1488322	NA	6	0.7339	8.018e-05	0.7	0.5666	0.8648	0.0009425	0.7738	0.6185	0.9681	0.02488
rs1488966	NA	11	1.5144	0.001321	1.453	1.021	2.069	0.03808	1.582	1.1	2.274	0.01333
rs149386227	CATSPERB	14	1.8309	1.813e-05	1.649	1.138	2.388	0.008174	2.088	1.378	3.162	0.0005122
rs149867940	NA	12	1.6247	0.0004963	1.607	1.131	2.285	0.008199	1.652	1.071	2.549	0.02313
rs150010515	NA	2	1.5801	0.001202	1.508	1.068	2.131	0.01976	1.718	1.082	2.729	0.02185
rs150535042	SPATA6	1	1.5659	0.001443	1.624	1.108	2.38	0.01292	1.505	1.01	2.241	0.04457
rs151268	NA	1	0.7297	0.001278	0.7254	0.5533	0.9509	0.02012	0.7341	0.5596	0.963	0.02561
rs1512922	NA	3	1.3824	6.4e-05	1.295	1.05	1.599	0.01594	1.507	1.183	1.919	0.0008938
rs1516823	FBXW7	4	1.6136	0.0002249	1.823	1.256	2.645	0.001594	1.451	1.025	2.055	0.03585
rs1517817	TMTC2	12	1.296	0.0007112	1.303	1.068	1.591	0.00927	1.287	1.025	1.617	0.02981
rs1520677	NA	3	0.7232	0.000117	0.7804	0.6315	0.9645	0.02176	0.659	0.5204	0.8345	0.0005362
rs1527588	NA	7	1.6501	0.0004905	1.521	1.062	2.178	0.02215	1.879	1.194	2.957	0.006419
rs1528033	IMMP2L	7	0.7111	0.001916	0.7149	0.5327	0.9594	0.02533	0.7067	0.5152	0.9694	0.03137
rs1528284	PTPRQ	12	1.333	0.003208	1.298	1.016	1.659	0.03701	1.389	1.023	1.884	0.03495
rs153017	TTC23L	5	0.745	0.0008213	0.7803	0.6239	0.9759	0.02972	0.6961	0.531	0.9127	0.00877
rs1535832	TRERF1	6	0.771	0.001318	0.8077	0.6544	0.9969	0.0467	0.7253	0.5696	0.9235	0.009162
rs1543119	NA	12	1.3938	0.003448	1.391	1.027	1.884	0.03281	1.397	1.007	1.939	0.04526
rs1548454	GSG1L	16	1.2989	0.0008605	1.266	1.026	1.562	0.02789	1.338	1.067	1.677	0.01161
rs1548801	NA	19	1.3932	0.0008034	1.396	1.07	1.82	0.01389	1.39	1.047	1.847	0.02285
rs154926	NA	18	1.2544	0.003725	1.244	1.011	1.532	0.03898	1.267	1.01	1.59	0.04066
rs1549500	BTBD11	12	1.2837	0.004944	1.274	1.004	1.616	0.0467	1.295	1.003	1.671	0.04726
rs1552528	NA	11	1.5312	0.001044	1.451	1.019	2.066	0.03879	1.623	1.124	2.344	0.009834
rs1552533	NA	11	1.5283	0.001561	1.538	1.067	2.218	0.02105	1.518	1.041	2.215	0.03018
rs1555872	PLXDC2	10	1.3728	0.002938	1.348	1.031	1.762	0.02901	1.412	1.012	1.971	0.04227
rs156662	NA	5	1.2933	0.003271	1.277	1.021	1.597	0.03206	1.317	1.009	1.72	0.04315
rs1572151	MTHFR	1	1.7074	0.0001987	1.58	1.072	2.327	0.02067	1.863	1.235	2.809	0.002994
rs1576104	NA	4	1.2712	0.002303	1.25	1.02	1.531	0.0313	1.301	1.026	1.65	0.02997
rs1579384	BTBD11	12	1.2865	0.004731	1.27	1.001	1.612	0.049	1.306	1.01	1.689	0.04173
rs1601108	NA	3	1.3281	0.0003321	1.278	1.031	1.584	0.02496	1.385	1.107	1.732	0.004403
rs1603322	NA	3	1.2884	0.001323	1.278	1.037	1.577	0.0217	1.301	1.035	1.636	0.02422
rs1609165	NA	7	1.6501	0.0004905	1.521	1.062	2.178	0.02215	1.879	1.194	2.957	0.006419
rs1613686	NA	3	0.7674	0.0007747	0.7852	0.6364	0.9687	0.02404	0.747	0.595	0.9378	0.01195
rs1619386	TSNAX-DISC1	1	0.7969	0.003413	0.8133	0.6626	0.9983	0.04808	0.7774	0.6198	0.9749	0.02929
rs1621535	OXR1	8	0.7299	0.003409	0.7411	0.5505	0.9978	0.04835	0.7188	0.5332	0.969	0.03028
rs163619	NA	5	0.7745	0.001395	0.8048	0.6507	0.9953	0.04513	0.7399	0.5866	0.9332	0.01097
rs1648282	DUOX1	15	0.7291	0.0002119	0.7841	0.6372	0.9649	0.02161	0.6597	0.5152	0.8447	0.0009755
rs1677650	MSH3	5	0.7398	0.0008832	0.7152	0.5568	0.9185	0.008651	0.7657	0.5951	0.9851	0.03781
rs1677682	MSH3	5	0.7463	0.001255	0.7186	0.5587	0.9242	0.01005	0.7749	0.6027	0.9961	0.04658
rs1680901	NA	6	1.277	0.002811	1.251	1.012	1.548	0.03889	1.312	1.028	1.675	0.02903
rs16828648	DIS3L2	2	0.5895	0.0005014	0.5702	0.378	0.8601	0.007396	0.6115	0.3972	0.9413	0.02544
rs16828734	DIS3L2	2	0.63	0.002828	0.6359	0.425	0.9513	0.02761	0.6223	0.3924	0.9867	0.04369
rs16842	NA	8	0.7724	0.004778	0.7596	0.5822	0.991	0.04268	0.7832	0.6142	0.9987	0.04877
rs16871726	NA	6	0.7504	0.0002807	0.7463	0.6027	0.924	0.007244	0.755	0.6029	0.9454	0.01431
rs16890107	NA	8	0.746	0.002149	0.7445	0.5784	0.9585	0.02208	0.7479	0.5661	0.988	0.04089
rs16893526	NA	6	1.586	0.001053	1.487	1.031	2.144	0.03351	1.727	1.134	2.63	0.01084
rs168959	NA	11	0.5717	0.001271	0.5991	0.3622	0.9908	0.04592	0.5497	0.3466	0.8719	0.01101
rs1692180	NA	1	0.63	0.002019	0.592	0.353	0.9928	0.0469	0.6489	0.4545	0.9265	0.01731
rs16964824	ASXL3	18	0.581	0.0004252	0.5838	0.392	0.8694	0.008073	0.5772	0.3631	0.9174	0.0201
rs16989258	NA	4	0.7333	0.00267	0.7474	0.5814	0.9608	0.02309	0.7078	0.5027	0.9967	0.04783
rs17048650	NA	4	1.4192	0.001394	1.381	1.056	1.806	0.01841	1.49	1.042	2.132	0.02907
rs17071995	NA	4	1.6867	0.0005705	1.627	1.095	2.418	0.01597	1.767	1.126	2.772	0.0132
rs17077264	NA	13	1.6714	0.001492	1.567	1.013	2.425	0.04358	1.796	1.133	2.848	0.01276
rs17078754	NA	18	0.6075	0.002757	0.6407	0.4291	0.9567	0.02951	0.5474	0.3122	0.9596	0.03537
rs17086283	NETO1	18	1.3044	0.002705	1.272	1.018	1.588	0.03419	1.357	1.027	1.793	0.03148
rs17102225	NA	11	1.5673	0.001008	1.573	1.087	2.276	0.0163	1.561	1.058	2.303	0.02475
rs17105462	NA	1	0.5465	8.481e-05	0.5946	0.3898	0.9071	0.01585	0.5007	0.3257	0.7696	0.001613
rs17127551	CATSPERB	14	1.7365	4.92e-05	1.634	1.135	2.353	0.008277	1.862	1.261	2.752	0.001793
rs17127562	TC2N	14	1.8685	6.579e-06	1.683	1.157	2.449	0.006467	2.098	1.414	3.112	0.0002341
rs17149610	NXPH1	7	0.5118	0.0006365	0.4968	0.2784	0.8867	0.01795	0.5239	0.3135	0.8757	0.01364
rs17211681	NA	7	1.4935	0.002773	1.523	1.041	2.227	0.03015	1.467	1.02	2.111	0.0389
rs17271888	NA	5	1.4908	0.005672	1.449	1	2.1	0.0499	1.551	1.001	2.402	0.0495
rs17277029	FBXW7	4	1.6255	0.0002144	1.846	1.271	2.681	0.001289	1.449	1.016	2.066	0.04058
rs17317701	OLA1	2	1.7566	0.0002735	1.942	1.284	2.938	0.001668	1.563	1	2.442	0.04988
rs17364455	TRIM24	7	0.6638	0.001259	0.7095	0.5093	0.9884	0.04245	0.609	0.4176	0.8881	0.009984
rs17433319	HDAC9	7	1.4801	0.003905	1.465	1.019	2.106	0.0392	1.498	1.012	2.217	0.04337
rs17464841	SOSTDC1	7	1.441	0.001376	1.415	1.068	1.874	0.01556	1.487	1.028	2.152	0.03528
rs17494372	CUX1	7	1.4118	0.003069	1.415	1.015	1.971	0.04028	1.409	1.028	1.93	0.03303
rs17576757	NA	5	1.5736	0.0003234	1.443	1.026	2.028	0.03494	1.733	1.21	2.482	0.002703
rs17585461	NA	17	1.289	0.002354	1.252	1.008	1.554	0.04197	1.34	1.043	1.72	0.02184
rs17600933	GREB1	2	1.3013	0.001028	1.273	1.035	1.566	0.02214	1.341	1.053	1.708	0.01727
rs17631978	NRG1	8	0.7538	0.001127	0.7921	0.6287	0.9979	0.04795	0.7109	0.5529	0.9141	0.0078
rs1766229	RALGPS1	9	1.2623	0.003013	1.237	1.002	1.526	0.04805	1.292	1.031	1.619	0.02627
rs1776261	NA	20	1.2633	0.00335	1.242	1.008	1.529	0.04186	1.291	1.02	1.634	0.03392
rs1777207	NCOA7	6	1.4786	0.002709	1.471	1.009	2.146	0.04487	1.485	1.049	2.101	0.02573
rs17799014	NA	2	0.7237	0.001745	0.7376	0.5629	0.9665	0.02733	0.7062	0.5202	0.9587	0.02571
rs17841620	NA	17	0.5299	0.001098	0.5627	0.3262	0.9706	0.03873	0.5003	0.2934	0.853	0.01095
rs17883517	CLIP1	12	0.6227	0.001283	0.6454	0.442	0.9424	0.0234	0.5925	0.3796	0.9249	0.02123
rs1809791	AGBL4	1	0.782	0.001809	0.8015	0.6525	0.9844	0.03491	0.7575	0.5995	0.9571	0.01995
rs1814155	NA	8	0.7505	0.0006792	0.7497	0.6043	0.9302	0.008853	0.7516	0.5804	0.9734	0.03045
rs1817520	NA	3	1.2872	0.001317	1.312	1.062	1.622	0.01191	1.26	1.007	1.577	0.04333
rs1835004	NA	6	1.3767	0.004526	1.361	1.014	1.827	0.0404	1.397	1.001	1.949	0.0494
rs1838401	NA	4	0.7219	0.001321	0.7454	0.5811	0.9561	0.02071	0.6821	0.49	0.9496	0.02344
rs1838403	NA	4	0.7434	0.003935	0.7809	0.6099	0.9998	0.0498	0.6742	0.4759	0.9551	0.02652
rs1838414	NA	1	1.3226	0.0006679	1.341	1.082	1.661	0.007269	1.299	1.017	1.659	0.03601
rs1844162	NA	7	0.7777	0.001656	0.7761	0.6271	0.9604	0.01975	0.7796	0.6188	0.9823	0.03474
rs1856297	AGBL4	1	0.7977	0.004006	0.8074	0.6574	0.9915	0.04125	0.7855	0.6226	0.991	0.04171
rs1864777	NA	18	0.6597	0.009017	0.5462	0.3737	0.7986	0.001803	0.7546	0.572	0.9956	0.04647
rs1876138	NA	3	1.4066	0.001746	1.391	1.032	1.875	0.03043	1.423	1.048	1.931	0.02369
rs1880875	NA	12	1.3334	0.002636	1.319	1.026	1.694	0.03061	1.352	1.019	1.794	0.03649
rs1886249	NA	6	1.4668	0.001	1.58	1.125	2.219	0.008365	1.38	1.015	1.878	0.0402
rs189016463	NA	2	1.8511	0.001186	2.227	1.494	3.319	8.45e-05	1.523	1.004	2.313	0.04809
rs1894964	NA	5	0.7749	0.001231	0.776	0.6289	0.9576	0.01805	0.7736	0.6155	0.9722	0.02771
rs1896750	NA	19	1.4013	0.0006779	1.413	1.083	1.843	0.01086	1.388	1.043	1.848	0.0244
rs189819425	NPAS3	14	0.4296	3.294e-05	0.4081	0.2225	0.7488	0.0038	0.4467	0.2632	0.7583	0.002841
rs1902083	NA	4	0.7206	0.001285	0.7561	0.5898	0.9694	0.02743	0.6606	0.4729	0.9229	0.0151
rs1905484	NA	3	0.7145	0.0003458	0.6743	0.5197	0.8748	0.003008	0.7572	0.5835	0.9825	0.03637
rs192403892	NA	4	1.4776	0.0002757	1.456	1.1	1.927	0.008556	1.506	1.095	2.072	0.01177
rs1925116	HS6ST3	13	0.7653	0.0006955	0.7777	0.6292	0.9611	0.01999	0.7515	0.5994	0.9421	0.01324
rs1925118	HS6ST3	13	0.7665	0.0007518	0.7728	0.6253	0.955	0.017	0.7593	0.6053	0.9525	0.01726
rs192781146	NA	5	1.5131	0.003205	1.442	1.042	1.996	0.02722	1.71	1.018	2.871	0.04246
rs1931415	NA	9	1.2978	0.001497	1.257	1.009	1.568	0.04177	1.346	1.063	1.703	0.01347
rs1932145	NA	9	1.3113	0.0006048	1.327	1.075	1.638	0.008356	1.293	1.029	1.625	0.02772
rs1934299	NA	1	0.7143	8.674e-05	0.6928	0.5552	0.8645	0.001158	0.7446	0.5755	0.9636	0.02496
rs1937357	NA	6	0.7326	7.455e-05	0.7005	0.5672	0.8652	0.0009558	0.7707	0.6155	0.9651	0.02323
rs1937364	NA	6	0.7348	7.66e-05	0.7012	0.5678	0.8659	0.0009748	0.7737	0.62	0.9656	0.02324
rs1940536	KCNK10	14	1.3179	0.0004655	1.334	1.087	1.638	0.005905	1.297	1.026	1.641	0.02991
rs1944210	GUCY1A2	11	0.7723	0.001317	0.7717	0.6248	0.953	0.01611	0.773	0.6098	0.9799	0.03335
rs1946247	GABRB2	5	1.4492	0.0018	1.492	1.06	2.1	0.02175	1.413	1.028	1.943	0.03318
rs1948146	NA	6	0.7296	6.114e-05	0.7005	0.5672	0.8652	0.0009558	0.7642	0.6099	0.9574	0.01938
rs1948307	LAMA2	6	1.3711	0.0006688	1.352	1.072	1.706	0.01082	1.402	1.046	1.879	0.02359
rs1958955	NA	14	1.6001	0.0008258	1.527	1.039	2.243	0.03105	1.681	1.133	2.495	0.009918
rs1959988	NA	14	0.7639	0.0005885	0.7917	0.6442	0.9731	0.02645	0.7305	0.5802	0.9197	0.007536
rs1960292	NA	12	0.5805	8.329e-05	0.5673	0.3947	0.8154	0.002193	0.5976	0.3977	0.8982	0.01326
rs1966631	NA	5	0.6577	0.002204	0.6614	0.4452	0.9827	0.04072	0.6546	0.4546	0.9427	0.02278
rs1971862	NA	2	1.8888	2.913e-05	2.082	1.394	3.11	0.000341	1.675	1.072	2.616	0.02336
rs198072	NA	21	1.2621	0.003408	1.236	1.001	1.527	0.04913	1.294	1.027	1.63	0.0287
rs198076	NA	21	1.2609	0.00348	1.236	1.001	1.527	0.04913	1.291	1.026	1.625	0.02935
rs198394	CLCN6	1	1.5957	0.000192	1.75	1.251	2.45	0.001101	1.436	1.003	2.058	0.04826
rs198415	CLCN6	1	1.4959	0.0001866	1.474	1.113	1.951	0.006724	1.525	1.106	2.102	0.009979
rs1986398	NA	8	1.3345	0.0003903	1.25	1.001	1.561	0.04867	1.431	1.138	1.8	0.0022
rs1994619	LAMA2	6	1.3695	0.0006748	1.322	1.051	1.664	0.01699	1.452	1.081	1.952	0.01337
rs1999153	NA	9	1.3695	0.002705	1.351	1.03	1.771	0.0297	1.395	1.018	1.913	0.03845
rs200018144	NA	3	0.7331	0.0006658	0.7971	0.6467	0.9826	0.03365	0.6637	0.5252	0.8386	0.0005951
rs2002839	NA	3	0.7858	0.002429	0.7956	0.647	0.9783	0.03018	0.773	0.6098	0.9799	0.03334
rs2003321	PRICKLE2	3	1.4091	4.68e-05	1.392	1.126	1.72	0.002205	1.436	1.103	1.869	0.007235
rs2004431	NA	19	1.4102	0.0003023	1.453	1.138	1.856	0.002745	1.353	1.015	1.805	0.03948
rs200888398	SBF2	11	0.7625	0.003434	0.7603	0.587	0.9848	0.03791	0.7647	0.5926	0.9868	0.03918
rs201062919	NA	5	1.3458	0.0006813	1.362	1.082	1.716	0.008571	1.326	1.027	1.713	0.03072
rs2027312	RALGPS1	9	1.3036	0.000774	1.28	1.036	1.582	0.02234	1.331	1.061	1.669	0.01328
rs2030967	IMMP2L	7	1.2415	0.005071	1.234	1.002	1.52	0.04791	1.25	1.003	1.558	0.04693
rs2039396	NA	9	1.3812	0.001142	1.389	1.059	1.822	0.01769	1.373	1.039	1.816	0.02601
rs2041689	AC007040.11	2	1.3653	0.001873	1.361	1.037	1.787	0.02642	1.37	1.032	1.819	0.02944
rs2050294	NA	6	0.7225	0.0004865	0.7487	0.5775	0.9707	0.02893	0.6977	0.5396	0.9022	0.006058
rs2069870	NA	5	1.4715	9.782e-05	1.607	1.218	2.121	0.0008019	1.352	1.03	1.775	0.02995
rs2072245	RGS6	14	1.3026	0.000768	1.274	1.037	1.565	0.02108	1.34	1.062	1.691	0.01348
rs207348	NA	4	1.4035	0.004686	1.369	1.001	1.873	0.04954	1.449	1.016	2.066	0.04058
rs2073922	GBGT1	9	0.7392	0.0007523	0.7703	0.614	0.9664	0.02411	0.6948	0.5261	0.9176	0.01029
rs2088207	NA	3	1.2886	0.001345	1.299	1.049	1.608	0.01626	1.277	1.02	1.6	0.03315
rs2105579	TRPC6	11	1.2811	0.001432	1.272	1.035	1.564	0.02218	1.292	1.031	1.618	0.02618
rs2106305	GRM3	7	1.3862	0.0008762	1.384	1.042	1.839	0.02502	1.388	1.069	1.802	0.01397
rs2109853	UNC80	2	1.5764	0.001105	1.511	1.035	2.207	0.03259	1.651	1.112	2.452	0.01289
rs2111169	BTBD11	12	1.3111	0.001511	1.296	1.045	1.606	0.01801	1.335	1.022	1.744	0.03432
rs2112604	NA	5	0.6697	0.000931	0.6893	0.4897	0.9704	0.03299	0.652	0.4689	0.9065	0.01096
rs2114256	BBS4	15	0.7637	0.00111	0.8049	0.6482	0.9996	0.04953	0.7143	0.5596	0.9118	0.006902
rs2114319	BTBD11	12	1.2921	0.003996	1.281	1.01	1.626	0.04121	1.305	1.01	1.687	0.04165
rs2120834	BMPR1B	4	0.7399	0.0002795	0.7562	0.603	0.9483	0.01555	0.7229	0.5724	0.913	0.006435
rs212551	NA	8	1.2917	0.004441	1.287	1.01	1.64	0.04129	1.297	1.003	1.677	0.0477
rs2127542	NA	11	1.3251	0.0003962	1.295	1.056	1.588	0.01317	1.368	1.076	1.741	0.01066
rs2146084	PALM2-AKAP2	9	1.3832	0.000797	1.363	1.072	1.734	0.01156	1.417	1.041	1.928	0.02656
rs214725	NA	12	0.7852	0.001765	0.7922	0.6461	0.9714	0.02514	0.7767	0.6193	0.9741	0.02872
rs2149524	NA	6	0.7267	0.000687	0.7325	0.5596	0.9588	0.02342	0.7216	0.5603	0.9293	0.01146
rs2151608	NAALADL2	3	1.3217	0.002943	1.277	1.007	1.62	0.04387	1.391	1.041	1.859	0.02573
rs2170872	UBA6	4	1.3052	0.0005796	1.311	1.07	1.607	0.008931	1.298	1.033	1.631	0.02529
rs2175527	CADPS	3	1.4063	0.0003093	1.421	1.097	1.841	0.007783	1.391	1.067	1.814	0.01483
rs2178085	AGBL4	1	0.7896	0.002562	0.8074	0.6581	0.9906	0.04031	0.7672	0.608	0.9679	0.02542
rs2191439	NA	19	1.3905	0.0008412	1.391	1.068	1.813	0.0144	1.39	1.047	1.847	0.02285
rs2192938	NA	2	1.4219	0.00105	1.362	1.074	1.726	0.01068	1.669	1.056	2.638	0.02816
rs2194019	NA	19	1.3389	0.005052	1.326	1.003	1.752	0.04742	1.354	1.004	1.826	0.04722
rs2195042	NA	18	0.7856	0.002813	0.7885	0.6324	0.9832	0.0348	0.7826	0.6236	0.9821	0.03436
rs2200477	NA	8	0.7714	0.001921	0.8088	0.6549	0.9988	0.04872	0.7177	0.5531	0.9312	0.01256
rs2206558	NA	1	1.4126	0.002079	1.508	1.078	2.11	0.01659	1.345	1.006	1.799	0.04564
rs2215242	SHISA6	17	1.5644	0.0002663	1.6	1.143	2.24	0.006211	1.528	1.083	2.155	0.01576
rs2216298	ST8SIA1	12	0.6736	0.0009002	0.6895	0.5037	0.9438	0.0203	0.6545	0.4619	0.9274	0.01712
rs222031	GC	4	0.734	0.003846	0.7176	0.524	0.9828	0.03861	0.7474	0.5641	0.9903	0.04256
rs2221603	NA	18	0.5518	0.0001945	0.523	0.3387	0.8077	0.003464	0.5846	0.3727	0.9172	0.01949
rs2233656	PFN1	17	0.6913	0.00236	0.7216	0.5464	0.953	0.02151	0.6151	0.3885	0.9739	0.03818
rs2235333	CARD10	22	0.7288	0.00108	0.6948	0.5286	0.9132	0.009028	0.7618	0.5854	0.9913	0.04284
rs223629	NA	2	1.2759	0.001502	1.284	1.048	1.573	0.01572	1.266	1.012	1.585	0.03889
rs2238332	BLM	15	0.7866	0.004757	0.7984	0.639	0.9977	0.0477	0.772	0.6007	0.9921	0.04317
rs2257182	PRKCZ	1	0.7804	0.001695	0.7969	0.6469	0.9818	0.03298	0.7606	0.6037	0.9583	0.02027
rs2277523	KCNK10	14	1.3249	0.0003785	1.316	1.073	1.615	0.008373	1.337	1.054	1.697	0.01667
rs2278617	PTPRB	12	1.3228	0.001675	1.302	1.044	1.625	0.01922	1.358	1.022	1.804	0.03472
rs2284277	SDC4	20	1.3142	0.003052	1.322	1.019	1.715	0.03536	1.307	1.016	1.68	0.03684
rs2285835	DCUN1D3	16	0.7423	0.001498	0.7876	0.6294	0.9856	0.03687	0.6572	0.4764	0.9065	0.01054
rs2290321	AQR	15	0.7891	0.003815	0.8022	0.6484	0.9925	0.04246	0.7722	0.6049	0.9858	0.038
rs2292910	CRY2	11	1.3175	0.001374	1.27	1	1.612	0.04962	1.367	1.076	1.736	0.01037
rs2297642	AVPI1	10	0.7956	0.004671	0.8054	0.6491	0.9994	0.0494	0.7842	0.621	0.9904	0.04123
rs2305198	HK1	10	0.754	0.001311	0.7437	0.5805	0.9526	0.01908	0.7638	0.6011	0.9704	0.02739
rs2327675	NA	6	0.7599	0.0005413	0.7346	0.593	0.9102	0.004791	0.7892	0.6294	0.9895	0.04022
rs2333451	NA	4	1.309	0.004585	1.308	1.008	1.696	0.04301	1.31	1.004	1.711	0.04677
rs2342640	SMOC2	6	1.7259	6.94e-05	1.669	1.128	2.471	0.01041	1.778	1.229	2.573	0.002263
rs2342641	SMOC2	6	1.6099	0.0003731	1.666	1.122	2.474	0.01134	1.567	1.104	2.225	0.01205
rs2357777	SPTB	14	1.3312	0.001161	1.316	1.036	1.672	0.02437	1.348	1.051	1.73	0.0188
rs2364195	NA	18	0.6953	0.003417	0.6615	0.4547	0.9624	0.03075	0.7209	0.5236	0.9927	0.04497
rs2366924	NA	18	0.5672	0.000293	0.5316	0.3442	0.8211	0.004388	0.6049	0.3922	0.933	0.02299
rs237675	NA	16	0.772	0.001156	0.7755	0.622	0.9669	0.02388	0.7684	0.616	0.9586	0.01953
rs2379609	PTPRS	19	1.3819	0.0003859	1.359	1.08	1.709	0.008758	1.418	1.067	1.885	0.01619
rs2384404	NA	12	1.3478	0.000388	1.258	1.009	1.568	0.04154	1.471	1.148	1.886	0.002296
rs2400021	FRMD4A	10	1.346	0.0002292	1.271	1.027	1.573	0.02766	1.443	1.141	1.826	0.002231
rs2400568	NA	5	0.6167	0.002333	0.648	0.4203	0.9991	0.04955	0.5849	0.3738	0.9152	0.01887
rs2403192	NA	14	1.2881	0.001734	1.268	1.033	1.555	0.02292	1.319	1.027	1.695	0.0303
rs2417050	RALGPS1	9	1.2886	0.001196	1.265	1.025	1.561	0.02834	1.316	1.052	1.648	0.01637
rs2425941	NCOA3	20	1.3429	0.0001956	1.414	1.142	1.751	0.001506	1.268	1.012	1.588	0.03921
rs2425955	NCOA3	20	1.3381	0.000229	1.414	1.142	1.751	0.001506	1.259	1.005	1.576	0.04502
rs242625	NA	18	1.2913	0.00119	1.312	1.066	1.615	0.01029	1.266	1.004	1.596	0.0462
rs242635	NA	18	1.2837	0.001524	1.299	1.056	1.599	0.01347	1.265	1.004	1.593	0.0464
rs242739	NA	14	0.6936	0.002979	0.727	0.5569	0.949	0.01905	0.5592	0.3162	0.9889	0.04568
rs2430338	TC2N	14	1.6163	7.062e-05	1.529	1.099	2.127	0.01173	1.714	1.22	2.407	0.001876
rs2430339	NA	14	1.6064	8.437e-05	1.497	1.077	2.082	0.01635	1.731	1.233	2.43	0.001521
rs244244	NA	21	1.2723	0.002901	1.251	1.006	1.554	0.04363	1.297	1.028	1.635	0.02798
rs2442723	NA	6	0.6759	0.002516	0.6476	0.4245	0.9879	0.04376	0.6925	0.5038	0.9519	0.02359
rs2459984	PRKCZ	1	0.784	0.002042	0.8001	0.6494	0.9857	0.03611	0.7648	0.6074	0.9629	0.02253
rs2460001	PRKCZ	1	0.7946	0.003432	0.8001	0.6494	0.9857	0.03611	0.7881	0.6272	0.9902	0.04089
rs246956	FSTL4	5	1.317	0.0004795	1.347	1.094	1.659	0.004992	1.281	1.017	1.614	0.0352
rs2481634	RFWD2	1	1.3814	0.00127	1.403	1.072	1.836	0.0135	1.357	1.017	1.81	0.03785
rs2481651	RFWD2	1	1.3439	0.002886	1.333	1.024	1.735	0.03242	1.357	1.017	1.81	0.03785
rs2481657	RFWD2	1	1.3231	0.004744	1.314	1.009	1.711	0.04242	1.334	1.001	1.778	0.04904
rs2483242	PRDM16	1	0.7847	0.002882	0.7802	0.6242	0.9753	0.02929	0.7895	0.6286	0.9914	0.04196
rs2487681	ARHGEF16	1	0.7478	0.003926	0.7593	0.5867	0.9826	0.03628	0.7318	0.5382	0.9951	0.04642
rs2503705	PRKCZ	1	0.7899	0.002813	0.8001	0.6494	0.9857	0.03611	0.7775	0.6172	0.9794	0.03263
rs2542145	NA	18	1.2959	0.0008949	1.299	1.057	1.595	0.01289	1.292	1.028	1.624	0.02793
rs2542606	NA	15	1.3264	0.0002206	1.345	1.097	1.65	0.004376	1.305	1.046	1.628	0.01812
rs2567350	NA	3	1.3477	0.0003323	1.306	1.061	1.608	0.01192	1.417	1.09	1.842	0.009305
rs2568859	EGFEM1P	3	0.6506	0.001873	0.5896	0.3849	0.9031	0.01516	0.6954	0.4897	0.9876	0.0424
rs2568862	EGFEM1P	3	0.598	0.001011	0.5537	0.3503	0.8751	0.01136	0.6366	0.4212	0.9621	0.03208
rs2595921	EGFEM1P	3	0.6057	0.0014	0.5384	0.3379	0.8578	0.009181	0.6634	0.4405	0.9992	0.04957
rs2595923	EGFEM1P	3	0.6026	0.001185	0.5336	0.335	0.8499	0.00818	0.6611	0.4403	0.9927	0.04601
rs2605232	CWH43	4	1.26	0.003106	1.229	1.004	1.505	0.04539	1.303	1.031	1.648	0.02678
rs2608073	NA	3	0.5602	0.001115	0.5891	0.3548	0.9781	0.04078	0.5355	0.3315	0.8652	0.01072
rs2626491	NA	3	0.6613	0.0007288	0.639	0.4453	0.917	0.0151	0.6795	0.493	0.9366	0.01827
rs262653	PRKCZ	1	0.7863	0.002363	0.7939	0.6432	0.98	0.0317	0.7775	0.6185	0.9774	0.0311
rs262685	C1orf86	1	0.7862	0.002324	0.7915	0.6411	0.9772	0.0297	0.7801	0.6209	0.9801	0.03297
rs2634529	NSMAF	8	0.635	0.00348	0.6204	0.3851	0.9994	0.04973	0.6453	0.4343	0.9588	0.03016
rs2667741	NA	7	1.3218	0.0004049	1.343	1.093	1.651	0.005044	1.295	1.025	1.636	0.03005
rs2670258	ZNF385D	3	0.693	0.001148	0.692	0.5037	0.9508	0.02313	0.694	0.5102	0.9441	0.02
rs2675592	NA	10	0.7454	0.0001235	0.7611	0.6187	0.9363	0.009788	0.7284	0.586	0.9054	0.004308
rs2675598	NA	10	1.3271	0.0003224	1.275	1.034	1.573	0.02327	1.391	1.108	1.746	0.004489
rs270012	THEMIS	6	0.7681	0.001109	0.7882	0.6388	0.9726	0.0265	0.7423	0.583	0.9451	0.01559
rs2711143	NA	4	1.2818	0.001341	1.272	1.037	1.56	0.0207	1.294	1.031	1.624	0.02627
rs2730585	NA	12	0.7712	0.002223	0.765	0.6054	0.9668	0.0249	0.7777	0.6138	0.9854	0.03737
rs2768948	CWH43	4	1.2607	0.003278	1.249	1.02	1.529	0.03181	1.277	1.007	1.621	0.04401
rs2782491	NA	1	0.7542	0.001013	0.7625	0.6047	0.9616	0.02196	0.7451	0.5835	0.9514	0.01829
rs2787589	RALGPS1	9	1.2769	0.001852	1.239	1.004	1.529	0.04606	1.322	1.055	1.657	0.01541
rs2789507	RALGPS1	9	1.2787	0.00164	1.262	1.023	1.557	0.03	1.298	1.038	1.623	0.02237
rs2796477	CAMTA1	1	0.6779	3.443e-05	0.6645	0.5098	0.8661	0.002499	0.6906	0.5348	0.8918	0.004537
rs2809390	NA	9	1.3026	0.001808	1.235	1.004	1.518	0.04574	1.435	1.086	1.896	0.01104
rs2834650	RUNX1	21	0.5225	0.000116	0.5642	0.3402	0.9356	0.02655	0.4935	0.3192	0.7631	0.001493
rs28366029	NA	2	0.6151	3.552e-05	0.5877	0.4312	0.801	0.0007662	0.6509	0.4612	0.9187	0.01459
rs28400344	DOCK5	8	0.5863	0.002877	0.6107	0.3737	0.998	0.04907	0.5618	0.34	0.9282	0.02441
rs28494029	LRRK1	15	1.4145	0.001251	1.42	1.066	1.892	0.01652	1.408	1.033	1.92	0.03046
rs28501357	LINGO1	15	1.4385	4.873e-05	1.557	1.26	1.924	4.09e-05	1.3	1.017	1.661	0.03595
rs28520822	MAPK10	4	0.7954	0.004165	0.8053	0.6499	0.9978	0.04769	0.7843	0.6237	0.9862	0.03763
rs28553549	GABRG3	15	1.6081	0.005087	1.524	1.005	2.313	0.04744	1.766	1.018	3.063	0.04289
rs28571021	NA	15	0.7527	0.001366	0.7581	0.5965	0.9635	0.02359	0.7468	0.58	0.9616	0.02358
rs2858211	FRY	13	0.731	0.001008	0.7297	0.5703	0.9337	0.01222	0.7327	0.5503	0.9755	0.03319
rs28642184	NA	3	1.3309	0.0003038	1.283	1.035	1.591	0.02302	1.385	1.107	1.732	0.004403
rs286734	NA	5	0.7619	0.0005753	0.7835	0.6366	0.9642	0.02123	0.7356	0.583	0.9282	0.009646
rs28679726	NA	6	1.4391	0.001848	1.506	1.072	2.118	0.01834	1.386	1.017	1.89	0.03878
rs28691127	NA	4	0.7488	0.004602	0.7768	0.6075	0.9932	0.04399	0.6965	0.4934	0.9832	0.03977
rs28706541	NA	9	0.7041	0.0001068	0.6733	0.5347	0.8478	0.0007671	0.7515	0.5691	0.9924	0.04402
rs2879436	RYR3	15	1.2731	0.003577	1.233	1.002	1.518	0.0481	1.339	1.032	1.738	0.02816
rs28818484	NA	1	0.6987	0.00326	0.686	0.4718	0.9973	0.04837	0.7076	0.5188	0.965	0.02891
rs28854930	LRRK1	15	1.4515	0.0006278	1.464	1.095	1.957	0.01014	1.437	1.048	1.969	0.02419
rs28868573	NA	19	1.3905	0.0008412	1.391	1.068	1.813	0.0144	1.39	1.047	1.847	0.02285
rs2896430	NA	14	1.4997	0.003757	1.529	1.034	2.262	0.03343	1.472	1.003	2.161	0.04832
rs2900650	NA	5	1.3845	0.000217	1.367	1.085	1.722	0.007956	1.407	1.086	1.824	0.009806
rs2903921	NA	11	0.62	0.0009599	0.6341	0.4264	0.9429	0.02443	0.6055	0.4034	0.9089	0.01549
rs2904119	NA	3	1.5172	0.0001789	1.545	1.163	2.052	0.002666	1.478	1.051	2.078	0.02463
rs292122	NA	20	0.5626	0.0005744	0.4898	0.2954	0.8119	0.005637	0.6219	0.4047	0.9556	0.03023
rs2940245	RGS5	1	0.7367	0.0003842	0.7856	0.6178	0.9991	0.04911	0.6922	0.5463	0.8771	0.002321
rs2950030	NA	5	1.3135	0.0005281	1.255	1.019	1.544	0.03221	1.389	1.103	1.748	0.005135
rs2950031	NA	5	1.3078	0.0006772	1.238	1.005	1.525	0.04471	1.399	1.111	1.763	0.004379
rs295817	NA	2	0.7353	0.001803	0.7584	0.6002	0.9583	0.02051	0.6883	0.4888	0.9692	0.03243
rs295824	NA	2	0.7255	0.001168	0.761	0.6023	0.9614	0.02203	0.6535	0.4624	0.9236	0.01593
rs296840	RCL1	9	0.6759	0.001105	0.6124	0.4283	0.8758	0.007223	0.7288	0.5332	0.9961	0.04721
rs2978128	NA	8	1.3049	0.003595	1.301	1.014	1.669	0.0387	1.309	1.011	1.693	0.04081
rs2984274	NIN	14	1.5368	0.0004898	1.583	1.148	2.184	0.00513	1.479	1.026	2.133	0.0359
rs2998402	RYR2	1	0.6616	0.002638	0.7229	0.5274	0.9909	0.04375	0.5347	0.3265	0.8757	0.01287
rs301184	NA	3	0.6582	0.001427	0.6153	0.4188	0.9039	0.01334	0.6949	0.4919	0.9817	0.03892
rs301206	NA	3	0.6484	0.0006167	0.5945	0.407	0.8685	0.007169	0.6919	0.4985	0.9603	0.02763
rs301212	NA	3	0.6442	0.0005066	0.5891	0.4033	0.8606	0.00621	0.6888	0.4963	0.9559	0.02577
rs301215	NA	3	0.6724	0.0007736	0.62	0.4359	0.8817	0.007799	0.7151	0.5261	0.9721	0.03231
rs3091236	IL21R	16	0.7162	0.0006771	0.7265	0.5601	0.9424	0.01609	0.704	0.5288	0.9373	0.01623
rs3092594	NCOA3	20	1.3443	0.0001842	1.411	1.139	1.747	0.001608	1.274	1.017	1.596	0.03519
rs3094621	NA	6	0.5248	9.58e-05	0.438	0.2482	0.7731	0.004401	0.5725	0.3859	0.8494	0.005584
rs3128293	PRKCZ	1	0.7957	0.004379	0.8007	0.647	0.9908	0.04088	0.7898	0.6258	0.9967	0.04687
rs3131643	NA	6	0.585	0.0003642	0.5559	0.3411	0.906	0.01846	0.6024	0.4162	0.8717	0.007185
rs3131921	NA	6	0.6543	0.00463	0.5589	0.3272	0.9548	0.03325	0.7002	0.4929	0.9948	0.04668
rs322719	RARB	3	1.408	0.003659	1.386	1.014	1.894	0.04057	1.435	1.019	2.021	0.03869
rs329079	EGFEM1P	3	0.6029	0.001191	0.5292	0.3321	0.843	0.007392	0.6657	0.4436	0.999	0.04941
rs329081	EGFEM1P	3	0.6127	0.001258	0.5632	0.3613	0.878	0.01126	0.6564	0.4395	0.9806	0.03979
rs329294	CHSY1	15	0.5488	0.001468	0.585	0.3464	0.988	0.04493	0.5152	0.3058	0.8678	0.01267
rs332135	WAC	10	0.7046	0.002964	0.6964	0.5021	0.966	0.03021	0.7128	0.5144	0.9876	0.04187
rs34046671	NA	14	1.4118	0.0006677	1.364	1.052	1.767	0.019	1.483	1.088	2.021	0.01256
rs34142222	NA	8	1.3067	0.00142	1.305	1.05	1.623	0.01627	1.309	1.018	1.683	0.03548
rs34353238	QKI	6	1.6608	0.0002445	1.53	1.075	2.176	0.01819	1.87	1.224	2.858	0.003786
rs34471369	PES1	22	0.5863	0.002169	0.5911	0.3511	0.9951	0.04788	0.5828	0.3709	0.9155	0.01913
rs34487978	WSCD2	12	0.652	0.0009172	0.541	0.3434	0.8523	0.008069	0.7089	0.5229	0.961	0.02667
rs34515618	NA	4	1.2597	0.003257	1.247	1.018	1.527	0.03312	1.277	1.009	1.616	0.04221
rs34533513	VN2R1P	3	1.3009	0.0007918	1.3	1.057	1.599	0.01287	1.302	1.035	1.637	0.02424
rs34664292	DLGAP1	18	0.7591	0.001358	0.7903	0.6317	0.9886	0.03934	0.7201	0.5573	0.9306	0.01207
rs34749564	NA	2	1.3904	0.001259	1.355	1.036	1.773	0.02638	1.436	1.063	1.94	0.01835
rs35046046	NA	8	0.7094	0.004542	0.6996	0.4914	0.9961	0.04751	0.7175	0.5211	0.988	0.04193
rs35048858	NA	15	0.6407	1.023e-06	0.6292	0.5013	0.7898	6.465e-05	0.6597	0.4945	0.8801	0.004674
rs35187476	NA	19	1.3797	0.001155	1.382	1.06	1.801	0.01676	1.377	1.035	1.832	0.02786
rs35368594	EPB41L4A	5	1.5462	0.003681	1.502	1.007	2.24	0.04606	1.6	1.036	2.471	0.03391
rs35411101	GTF2F2	13	1.5426	0.003104	1.638	1.055	2.541	0.02783	1.475	1.009	2.157	0.04471
rs35448284	MAP3K6	1	1.3082	0.0007632	1.341	1.082	1.662	0.007378	1.272	1.012	1.599	0.03891
rs35449107	NA	8	1.3716	0.0003653	1.277	1	1.63	0.04994	1.476	1.153	1.891	0.002021
rs35524072	AGBL4	1	0.7951	0.003545	0.8074	0.6574	0.9915	0.04125	0.7796	0.6176	0.9841	0.03618
rs355433	NA	5	0.7359	0.0004136	0.6956	0.5453	0.8872	0.003461	0.7766	0.612	0.9854	0.03747
rs355490	CENPC	4	0.7745	0.003398	0.7701	0.5968	0.9938	0.04464	0.7781	0.6179	0.9799	0.03295
rs35589574	NA	7	0.7294	0.00195	0.6933	0.5157	0.9319	0.01521	0.761	0.5805	0.9977	0.04808
rs35624710	NA	18	1.3486	0.0007558	1.316	1.029	1.683	0.02883	1.382	1.08	1.767	0.0101
rs35639067	RPS6KA5	14	0.6194	0.0006923	0.6573	0.4412	0.9795	0.03922	0.5861	0.399	0.8608	0.006448
rs35700404	NA	3	0.6474	0.0006788	0.613	0.426	0.882	0.008385	0.6801	0.4811	0.9614	0.02906
rs35713708	NA	2	1.3444	0.002358	1.307	1.011	1.689	0.04115	1.392	1.047	1.851	0.02281
rs35772805	NA	20	0.7654	0.002629	0.7685	0.6087	0.9703	0.02684	0.7615	0.5859	0.9898	0.04166
rs35919087	NA	3	0.6099	0.001102	0.6882	0.4774	0.9922	0.04529	0.5043	0.3167	0.8031	0.003931
rs35973783	NA	1	0.7781	0.001968	0.7808	0.6273	0.9718	0.02666	0.775	0.6151	0.9763	0.03052
rs35986022	RPH3A	12	0.5471	0.001305	0.5029	0.2836	0.8919	0.0187	0.5803	0.3593	0.9374	0.02613
rs360084	TMEM63A	1	1.5595	0.0005628	1.516	1.084	2.121	0.01513	1.618	1.103	2.374	0.01384
rs36144868	WI2-2373I1.2	7	1.2766	0.002397	1.238	1	1.531	0.04985	1.325	1.048	1.675	0.01873
rs36172888	NA	10	0.7751	0.00259	0.7757	0.6235	0.965	0.02265	0.7743	0.6002	0.9988	0.04894
rs36262	NDUFA7	19	0.77	0.001319	0.7667	0.6209	0.9467	0.01357	0.7744	0.6069	0.9881	0.03975
rs36564	NA	14	0.613	0.000524	0.5579	0.3545	0.8782	0.0117	0.6481	0.4572	0.9188	0.01486
rs36938	KCNN2	5	1.2882	0.00115	1.286	1.047	1.579	0.01666	1.291	1.028	1.621	0.02795
rs37315	NA	7	0.7531	0.002284	0.7776	0.6057	0.9982	0.04837	0.7262	0.5564	0.9479	0.01859
rs3737964	CLCN6	1	1.3753	0.0004919	1.45	1.119	1.878	0.004931	1.31	1.022	1.679	0.03324
rs37390	NA	5	1.2632	0.003118	1.246	1.016	1.528	0.03447	1.287	1.014	1.633	0.03807
rs3740360	PLCE1	10	1.5196	0.001317	1.471	1.022	2.118	0.03776	1.568	1.096	2.243	0.01376
rs3741370	PACS1	11	0.7395	0.003895	0.7773	0.6061	0.9969	0.04724	0.666	0.4643	0.9554	0.02725
rs3742691	KCNK10	14	1.2801	0.001595	1.278	1.044	1.565	0.01756	1.283	1.015	1.623	0.03743
rs37433	BRIX1	5	0.7064	0.0001638	0.7006	0.5503	0.8919	0.003871	0.7138	0.5435	0.9375	0.01534
rs37436	RAD1	5	0.7113	0.0003618	0.6975	0.5442	0.8939	0.004425	0.73	0.5489	0.9708	0.0305
rs3746157	NA	19	1.3663	0.001239	1.359	1.05	1.759	0.01971	1.375	1.04	1.817	0.02548
rs3748735	PLXNA2	1	0.7176	0.001849	0.7178	0.5379	0.958	0.02438	0.7174	0.5301	0.9709	0.03146
rs3748971	ECEL1P2	2	0.5465	0.001049	0.5268	0.3046	0.9111	0.02185	0.5621	0.3475	0.9094	0.01892
rs3768471	STRIP1	1	0.691	0.004638	0.7183	0.5237	0.9853	0.04021	0.6419	0.415	0.9929	0.04637
rs3787233	NCOA3	20	1.3468	0.0001677	1.414	1.142	1.752	0.001486	1.276	1.019	1.599	0.03376
rs3791294	MGAT5	2	1.2663	0.003193	1.228	1.002	1.505	0.04737	1.325	1.035	1.697	0.02546
rs3803258	SLC10A2	13	0.6881	0.003469	0.6287	0.4124	0.9584	0.03096	0.7229	0.5292	0.9875	0.04142
rs3816027	CACNA1A	19	0.7725	0.001088	0.7672	0.6212	0.9475	0.01387	0.7787	0.6201	0.978	0.03148
rs3817442	NA	11	0.7855	0.002657	0.7908	0.6388	0.979	0.03119	0.7791	0.6169	0.9841	0.03618
rs3820198	LRP8	1	0.7531	0.0009267	0.7627	0.6053	0.9609	0.02152	0.7426	0.5819	0.9478	0.01683
rs3847757	NA	12	1.6247	0.0004963	1.607	1.131	2.285	0.008199	1.652	1.071	2.549	0.02313
rs3850299	NA	14	0.768	0.0007824	0.7998	0.6509	0.9828	0.0336	0.7296	0.5786	0.92	0.007702
rs3907222	NA	5	1.4541	0.0005927	1.385	1.062	1.808	0.01638	1.588	1.11	2.272	0.01141
rs3923988	NA	13	1.3792	0.002468	1.355	1.047	1.755	0.02112	1.425	1.003	2.024	0.04814
rs3924517	NA	18	1.3917	0.0004766	1.444	1.111	1.876	0.005954	1.341	1.031	1.743	0.02872
rs3940418	NA	15	1.5596	0.0006938	1.51	1.09	2.091	0.01318	1.645	1.083	2.499	0.01953
rs3957605	NA	11	1.4448	0.0001966	1.464	1.123	1.908	0.004789	1.423	1.071	1.889	0.0149
rs3958114	MRGPRX3	11	1.5134	0.002958	1.51	1.029	2.216	0.03528	1.517	1.028	2.239	0.03594
rs400904	PLD5	1	0.7695	0.001014	0.7679	0.6266	0.9411	0.01093	0.7718	0.6046	0.9851	0.03747
rs41268085	NA	1	0.547	0.001331	0.5625	0.3279	0.9651	0.03672	0.5339	0.3225	0.8837	0.01467
rs41271249	ITPR3	6	0.5494	0.0003989	0.5647	0.3714	0.8585	0.007501	0.5248	0.3052	0.9023	0.01971
rs41275464	C1orf167	1	1.6286	0.0005317	1.644	1.122	2.408	0.01077	1.612	1.082	2.403	0.01901
rs4144789	NA	4	0.7406	0.003783	0.7673	0.598	0.9845	0.03723	0.6902	0.4858	0.9806	0.0385
rs414975	NA	11	0.5476	0.001087	0.5214	0.2948	0.9224	0.02525	0.5659	0.3548	0.9027	0.01685
rs424079	PRKCZ	1	0.7916	0.00326	0.7947	0.6431	0.9822	0.0335	0.788	0.6264	0.9914	0.04196
rs4274405	NA	15	0.7586	0.003279	0.7757	0.6078	0.9899	0.04116	0.7366	0.5563	0.9754	0.03284
rs4313442	AGBL4	1	0.8005	0.004663	0.8114	0.6601	0.9974	0.04723	0.7869	0.6241	0.9922	0.04271
rs4321278	NA	18	1.3506	0.0002044	1.29	1.037	1.605	0.02203	1.422	1.128	1.791	0.00286
rs4406792	NA	11	1.5477	0.001221	1.506	1.048	2.164	0.0267	1.597	1.084	2.354	0.01799
rs4431418	NA	6	0.7629	0.003524	0.7796	0.6134	0.991	0.04195	0.741	0.5609	0.9789	0.03485
rs4433238	NA	9	1.5056	0.004367	1.405	1.012	1.95	0.04206	1.826	1.056	3.157	0.03124
rs4433998	ST6GAL2	2	0.6692	0.002425	0.6113	0.4006	0.9327	0.02243	0.7069	0.5087	0.9823	0.03879
rs4439120	NA	8	1.361	0.0001453	1.265	1.013	1.58	0.03841	1.469	1.17	1.844	0.0009102
rs4439391	NA	1	0.7049	4.283e-05	0.6894	0.5518	0.8614	0.001061	0.7257	0.5628	0.9358	0.01344
rs4440675	PTK2	8	0.7869	0.003179	0.8001	0.6458	0.9913	0.04135	0.7708	0.6074	0.9782	0.03222
rs4454586	ELAVL4	1	0.8013	0.004766	0.8082	0.6577	0.9931	0.04283	0.7927	0.6291	0.9989	0.04891
rs4476257	RIT2	18	1.2617	0.002998	1.264	1.027	1.556	0.02695	1.259	1.002	1.581	0.04795
rs4485968	EPB41L4A	5	1.5599	0.003186	1.559	1.04	2.338	0.0316	1.561	1.013	2.405	0.04338
rs4487733	NA	8	0.7427	0.00404	0.7366	0.5486	0.989	0.04198	0.7483	0.5658	0.9896	0.04206
rs4494467	NA	14	0.7671	0.0007152	0.8013	0.6498	0.9881	0.03825	0.7292	0.5818	0.9139	0.006125
rs4503337	NA	4	0.7219	0.001321	0.7454	0.5811	0.9561	0.02071	0.6821	0.49	0.9496	0.02344
rs451061	PRKCZ	1	0.7863	0.002363	0.7939	0.6432	0.98	0.0317	0.7775	0.6185	0.9774	0.0311
rs4511552	WWOX	16	0.5414	0.001069	0.4824	0.2812	0.8274	0.008089	0.5983	0.3621	0.9887	0.04502
rs4537111	SMOC2	6	1.2775	0.002171	1.285	1.037	1.591	0.02177	1.269	1.009	1.596	0.0421
rs45495393	OAS1	12	0.6624	4.989e-05	0.6261	0.4736	0.8276	0.001008	0.7021	0.5285	0.9328	0.01468
rs4555595	NA	4	1.2918	0.001121	1.291	1.055	1.579	0.01298	1.293	1.018	1.642	0.03513
rs4568654	NA	9	0.7664	0.0009839	0.7752	0.6255	0.9607	0.02	0.7561	0.5983	0.9556	0.01929
rs4577275	NA	2	0.6598	0.002403	0.6085	0.3917	0.9455	0.02716	0.6921	0.4932	0.9712	0.03323
rs4577472	NA	3	1.2996	0.001011	1.277	1.033	1.578	0.02395	1.327	1.053	1.672	0.01658
rs4583659	NA	3	0.7229	0.001332	0.7462	0.5656	0.9845	0.03842	0.6994	0.5268	0.9285	0.01341
rs458784	GRIK1	21	1.3587	0.004029	1.354	1.017	1.804	0.03793	1.364	1.005	1.85	0.04622
rs4658790	PLD5	1	1.2792	0.002441	1.258	1.014	1.561	0.0372	1.305	1.031	1.652	0.02706
rs4670947	NA	2	1.3728	0.003148	1.302	1.026	1.652	0.02986	1.656	1.058	2.593	0.02743
rs4685615	NA	3	0.6323	0.003127	0.6979	0.528	0.9223	0.01146	0.4955	0.2951	0.8321	0.007928
rs4685918	NA	3	1.6607	0.0006654	1.721	1.165	2.543	0.006428	1.587	1.022	2.465	0.03965
rs4688892	NA	3	1.3209	0.0006368	1.252	1.013	1.547	0.03755	1.418	1.112	1.809	0.00491
rs4691806	FSTL5	4	0.6003	8.609e-05	0.5908	0.418	0.8351	0.002874	0.6117	0.4198	0.8913	0.0105
rs4693769	MAPK10	4	1.2701	0.004518	1.255	1.007	1.563	0.04271	1.29	1.005	1.657	0.04592
rs4702140	NA	5	1.4485	0.0008882	1.43	1.088	1.878	0.01028	1.482	1.03	2.134	0.03426
rs4705088	PPARGC1B	5	1.2879	0.001195	1.276	1.036	1.571	0.02178	1.302	1.039	1.632	0.02189
rs4705886	NA	5	1.3249	0.002501	1.291	1.01	1.649	0.0413	1.368	1.041	1.797	0.02434
rs4709011	NA	6	1.3104	0.0005452	1.356	1.102	1.67	0.00403	1.258	1.003	1.579	0.04751
rs4714586	TRERF1	6	0.7523	0.0004436	0.8046	0.6518	0.9931	0.04295	0.6885	0.5406	0.8769	0.002487
rs472455	CDH19	18	0.7522	0.0005388	0.7583	0.6138	0.9369	0.01033	0.7438	0.5797	0.9545	0.02001
rs4728092	NA	7	0.7475	0.002968	0.7543	0.5749	0.9898	0.04196	0.7407	0.5646	0.9718	0.03025
rs4756939	NA	11	0.7118	0.001788	0.7164	0.54	0.9504	0.02075	0.7058	0.5099	0.977	0.03572
rs4764306	TMEM52B	12	1.2864	0.002494	1.272	1.032	1.568	0.02416	1.309	1.008	1.698	0.04316
rs4776294	MEGF11	15	1.2879	0.001272	1.275	1.037	1.569	0.02141	1.304	1.036	1.641	0.02354
rs4776618	NA	15	0.6714	1.278e-05	0.6509	0.5177	0.8184	0.0002372	0.705	0.5293	0.939	0.01682
rs4776767	MEGF11	15	1.2938	0.001006	1.275	1.037	1.569	0.02141	1.317	1.048	1.655	0.01823
rs4777566	NA	15	0.664	4.29e-06	0.6215	0.4968	0.7777	3.19e-05	0.7356	0.5568	0.9718	0.03066
rs4785577	SPG7	16	1.3492	0.0009248	1.356	1.067	1.722	0.0126	1.341	1.03	1.746	0.02928
rs4791455	SHISA6	17	1.525	0.001065	1.581	1.111	2.25	0.01088	1.468	1.022	2.109	0.03782
rs4801250	ZSCAN18	19	1.3188	0.004688	1.311	1.009	1.704	0.04232	1.328	1.002	1.761	0.04867
rs4801275	SLC27A5	19	0.6141	0.001895	0.6507	0.4355	0.9723	0.03597	0.5655	0.3503	0.9127	0.0196
rs4801602	ZBTB45	19	0.6154	0.002624	0.6389	0.423	0.9649	0.03318	0.5834	0.3565	0.9549	0.03205
rs4804967	NA	19	1.3219	0.003155	1.298	1.003	1.679	0.04745	1.348	1.033	1.76	0.02809
rs4804970	NA	19	1.3153	0.003745	1.298	1.003	1.679	0.04745	1.334	1.022	1.742	0.03406
rs4805609	NA	19	1.3664	0.001211	1.359	1.05	1.759	0.01971	1.375	1.041	1.815	0.02474
rs4805663	NA	19	1.3339	0.002125	1.341	1.041	1.728	0.0232	1.326	1.015	1.731	0.03849
rs4810541	NA	20	0.6903	0.000911	0.6926	0.5199	0.9226	0.01204	0.687	0.4892	0.9648	0.03024
rs483018	COL4A1	13	0.7559	0.0006826	0.7309	0.5811	0.9192	0.007364	0.7814	0.6225	0.9809	0.03349
rs4836560	RALGPS1	9	1.2901	0.001121	1.262	1.023	1.557	0.03	1.323	1.057	1.655	0.01448
rs4851213	AFF3	2	0.7644	0.003027	0.7679	0.6082	0.9696	0.02644	0.7595	0.5773	0.9994	0.04947
rs4854483	NA	2	0.6016	0.0001667	0.6367	0.4635	0.8746	0.005319	0.5291	0.328	0.8535	0.009077
rs4855805	NA	3	1.2998	0.0009634	1.315	1.061	1.629	0.01239	1.283	1.023	1.609	0.03101
rs4860120	NA	4	0.7839	0.003841	0.7859	0.6275	0.9844	0.036	0.7816	0.6132	0.9963	0.04664
rs4865028	NA	4	0.7572	0.003737	0.755	0.5815	0.9803	0.0349	0.7595	0.5792	0.996	0.04669
rs4867180	NA	5	1.3074	0.0008849	1.256	1.02	1.546	0.03183	1.381	1.083	1.761	0.009234
rs4869941	PLEKHG1	6	1.3272	0.0007631	1.295	1.047	1.601	0.01692	1.378	1.06	1.79	0.0166
rs4891487	NETO1	18	1.3016	0.002857	1.276	1.021	1.594	0.03219	1.342	1.018	1.768	0.03664
rs4895801	NCOA7	6	0.788	0.002572	0.8114	0.6587	0.9994	0.04935	0.7602	0.6032	0.958	0.02017
rs4901622	NA	14	1.2407	0.005485	1.224	1	1.498	0.04966	1.263	1.002	1.592	0.04822
rs490887	B3GAT2	6	1.3141	0.001684	1.287	1.034	1.602	0.02413	1.357	1.034	1.78	0.02773
rs4912415	C1orf168	1	1.3168	0.0005203	1.341	1.092	1.646	0.00517	1.285	1.013	1.629	0.03892
rs492565	NA	4	0.7795	0.002788	0.7902	0.6312	0.9892	0.03989	0.7677	0.6053	0.9736	0.02924
rs4926831	AGBL4	1	0.7881	0.002396	0.8074	0.6574	0.9915	0.04125	0.7643	0.6063	0.9636	0.02298
rs493162	NA	2	1.2536	0.003059	1.25	1.022	1.527	0.02962	1.258	1.005	1.574	0.04479
rs494901	MAML2	11	1.2871	0.00125	1.3	1.055	1.6	0.0136	1.272	1.014	1.596	0.03714
rs4949406	NA	1	0.7125	6.776e-05	0.6971	0.5583	0.8704	0.001447	0.733	0.5695	0.9435	0.01587
rs4956261	NA	4	0.6852	0.000786	0.7253	0.543	0.9686	0.02957	0.6331	0.4501	0.8905	0.008637
rs4958026	EPB41L4A	5	1.6555	0.0004944	1.637	1.115	2.402	0.01184	1.678	1.102	2.557	0.01594
rs4972790	NA	2	0.7746	0.001557	0.7919	0.6403	0.9793	0.03136	0.7535	0.5944	0.955	0.01927
rs521767	NA	6	1.3315	0.002501	1.302	1.01	1.678	0.04205	1.366	1.041	1.793	0.0243
rs528705	CLCN6	1	1.4959	0.0001866	1.474	1.113	1.951	0.006724	1.525	1.106	2.102	0.009979
rs531609	NA	3	0.7596	0.003783	0.776	0.6032	0.9984	0.04855	0.7404	0.5618	0.9757	0.03278
rs536302	NA	1	0.7712	0.001495	0.7591	0.608	0.9476	0.01489	0.7846	0.6221	0.9895	0.04045
rs539051	CLASP2	3	1.6023	0.001214	1.599	1.1	2.322	0.01381	1.607	1.031	2.503	0.036
rs545286278	NA	2	0.6375	0.001113	0.6485	0.4285	0.9814	0.04048	0.6294	0.4403	0.8999	0.01115
rs545621	AGBL4	1	0.774	0.001151	0.805	0.6558	0.988	0.03799	0.735	0.5811	0.9297	0.01022
rs554697	NA	6	1.3114	0.0006286	1.265	1.028	1.556	0.02664	1.373	1.086	1.736	0.008014
rs55641524	NA	4	1.4694	0.001822	1.473	1.039	2.087	0.02967	1.466	1.048	2.051	0.02549
rs55676624	PIK3CA	3	0.725	0.001486	0.7421	0.5622	0.9796	0.03523	0.7076	0.5329	0.9396	0.01682
rs55685046	NA	12	1.4975	0.0003751	1.398	1.05	1.861	0.02162	1.664	1.168	2.371	0.004832
rs55760757	NA	12	1.3814	0.003949	1.371	1.019	1.845	0.03744	1.394	1.006	1.932	0.04612
rs55771739	NA	7	1.4086	0.005179	1.378	1.002	1.895	0.04852	1.45	1.006	2.091	0.04638
rs55820428	GALNT18	11	0.721	0.001026	0.7282	0.571	0.9287	0.0106	0.708	0.5102	0.9825	0.03887
rs55871008	NA	14	1.6938	0.0003203	1.555	1.05	2.302	0.02749	1.869	1.227	2.847	0.003604
rs55873776	NA	19	1.3717	0.001378	1.382	1.06	1.801	0.01682	1.36	1.024	1.805	0.03377
rs55878929	NA	4	0.7073	0.0009265	0.7169	0.5558	0.9246	0.01035	0.69	0.4883	0.9751	0.03547
rs55883832	NA	19	1.3778	0.001235	1.37	1.05	1.785	0.02015	1.387	1.042	1.846	0.02509
rs55946710	NA	19	1.3757	0.001318	1.386	1.062	1.808	0.01629	1.364	1.026	1.815	0.03282
rs55947189	NA	19	1.3789	0.001282	1.406	1.077	1.836	0.01226	1.348	1.011	1.798	0.04157
rs55980797	NA	19	1.3323	0.004275	1.317	1.006	1.724	0.04546	1.35	1.012	1.8	0.04142
rs56021267	NA	6	1.57	0.0008749	1.496	1.046	2.14	0.02717	1.666	1.121	2.477	0.01165
rs56072262	NA	2	0.4047	2.359e-05	0.4084	0.2196	0.7596	0.004679	0.4016	0.2273	0.7095	0.001677
rs56097215	FBXW7	4	1.6512	1.289e-05	1.802	1.339	2.426	0.000102	1.467	1.038	2.073	0.02996
rs56132985	NA	19	1.3689	0.00195	1.318	1.006	1.728	0.04537	1.431	1.068	1.917	0.01632
rs56158678	NA	19	1.3869	0.001004	1.393	1.068	1.819	0.01464	1.38	1.037	1.837	0.02729
rs56203831	NA	10	1.5738	0.003337	1.543	1.023	2.329	0.03872	1.611	1.03	2.521	0.03667
rs56209104	NA	14	0.6866	0.002227	0.7349	0.5401	0.9998	0.04989	0.6165	0.4185	0.9082	0.01439
rs56239194	UBE2O	17	0.7632	0.003386	0.777	0.612	0.9865	0.03832	0.745	0.5649	0.9825	0.03708
rs56372827	TNS1	2	1.3858	0.00229	1.361	1.012	1.831	0.04165	1.411	1.049	1.898	0.02277
rs56380038	NA	7	0.7125	0.003846	0.7212	0.521	0.9983	0.04885	0.7039	0.5086	0.9741	0.03417
rs56380109	NA	2	1.5916	0.002642	1.594	1.051	2.417	0.02823	1.589	1.021	2.472	0.03996
rs563880	FRK	6	1.3318	0.002551	1.302	1.01	1.678	0.04205	1.367	1.04	1.796	0.02511
rs56741529	FRMD4B	3	1.2832	0.002696	1.257	1.006	1.57	0.04441	1.314	1.035	1.669	0.02491
rs56758314	SBF2	11	0.7566	0.002578	0.7621	0.5883	0.9872	0.03963	0.7513	0.5827	0.9687	0.02747
rs56759493	NA	11	1.5142	0.002126	1.503	1.046	2.16	0.02748	1.527	1.036	2.249	0.03238
rs568904	NA	3	0.7934	0.002826	0.8096	0.66	0.993	0.04261	0.7737	0.6163	0.9712	0.02696
rs56907829	TMEM150C	4	1.3507	0.0003174	1.288	1.036	1.601	0.02269	1.437	1.121	1.842	0.004221
rs569532090	NA	2	1.6349	0.0008952	1.67	1.134	2.459	0.009422	1.591	1.027	2.465	0.03771
rs57236946	NA	1	1.5275	0.0028	1.549	1.052	2.282	0.02671	1.505	1.01	2.241	0.04457
rs57304725	NA	6	1.4961	0.001859	1.394	1.029	1.89	0.03216	1.76	1.11	2.79	0.01621
rs57310430	NA	5	0.6133	0.002689	0.6274	0.4043	0.9736	0.0376	0.5979	0.3757	0.9515	0.03005
rs57387892	BTBD11	12	1.3092	0.00171	1.288	1.037	1.6	0.02216	1.342	1.028	1.753	0.0307
rs57533008	NA	5	1.4666	0.002844	1.561	1.042	2.339	0.03088	1.41	1.022	1.944	0.03612
rs57840224	NA	10	0.6264	0.001298	0.6433	0.44	0.9406	0.02285	0.6053	0.3933	0.9316	0.02248
rs57841816	NA	12	1.501	0.0005813	1.42	1.078	1.87	0.01257	1.716	1.119	2.632	0.01329
rs57924834	NA	15	1.2985	0.002359	1.262	1.008	1.58	0.04205	1.347	1.045	1.738	0.02168
rs57984947	NA	19	1.3905	0.0008412	1.391	1.068	1.813	0.0144	1.39	1.047	1.847	0.02285
rs58230608	NA	2	1.7191	9.318e-05	1.533	1.05	2.238	0.02698	1.942	1.314	2.869	0.0008622
rs58332159	NA	19	1.398	0.0007086	1.405	1.077	1.832	0.01211	1.39	1.047	1.847	0.02285
rs583908	NA	4	1.3185	0.001863	1.284	1.024	1.609	0.03014	1.371	1.043	1.803	0.02389
rs58430341	RPS6KA5	14	0.6641	0.002532	0.674	0.4575	0.9929	0.04593	0.6555	0.455	0.9443	0.02334
rs58656292	NA	4	0.7409	0.002978	0.7816	0.6141	0.9948	0.04526	0.6636	0.4694	0.9381	0.02024
rs58675032	NA	11	0.6763	0.0001373	0.7134	0.5513	0.9231	0.01022	0.6223	0.4512	0.8583	0.003834
rs58704893	AGMO	7	0.7363	0.004725	0.7312	0.5386	0.9925	0.04458	0.7411	0.5516	0.9957	0.04672
rs58752301	DIS3L2	2	0.6325	0.0002116	0.6024	0.427	0.8499	0.003898	0.6636	0.4718	0.9335	0.01852
rs58936988	MEGF11	15	1.2737	0.002056	1.248	1.014	1.535	0.03609	1.306	1.038	1.643	0.0226
rs58955940	NA	9	0.7807	0.003891	0.8039	0.6483	0.9969	0.04674	0.7456	0.5696	0.9761	0.03269
rs59071933	NA	14	0.6733	0.002963	0.6943	0.4854	0.9931	0.04572	0.6502	0.4441	0.9518	0.02683
rs59212194	KIF16B	20	0.6241	0.003174	0.6528	0.4262	0.9997	0.04985	0.5921	0.3732	0.9394	0.02605
rs59245529	DIS3L2	2	0.5918	0.0008514	0.563	0.3681	0.8609	0.008028	0.6256	0.3997	0.9792	0.04016
rs59402268	NA	12	1.3595	0.001178	1.354	1.04	1.762	0.02445	1.365	1.051	1.772	0.01956
rs59487235	NA	5	1.5315	0.002027	1.688	1.099	2.593	0.01676	1.436	1.013	2.036	0.04204
rs59806219	NA	18	1.3061	0.002051	1.27	1	1.612	0.04982	1.344	1.055	1.711	0.01655
rs60002684	TLE2	19	1.268	0.003457	1.268	1.018	1.579	0.03419	1.268	1.006	1.597	0.04396
rs6012010	NA	20	0.6947	0.001061	0.6902	0.5181	0.9195	0.0113	0.7008	0.501	0.9804	0.03791
rs6012016	NA	20	0.6994	0.001449	0.6984	0.5232	0.9322	0.01483	0.7007	0.4989	0.984	0.04006
rs6018578	NCOA3	20	1.3468	0.0001677	1.414	1.142	1.752	0.001486	1.276	1.019	1.599	0.03376
rs6018607	NCOA3	20	1.3489	0.0001577	1.409	1.138	1.745	0.001672	1.285	1.025	1.61	0.02951
rs60238482	NA	14	1.5221	0.0002509	1.594	1.18	2.154	0.002408	1.436	1.024	2.014	0.03592
rs60274701	LCT	2	1.4482	7.925e-05	1.464	1.173	1.828	0.0007476	1.414	1.018	1.964	0.03891
rs60356568	DIS3L2	2	0.633	0.0001464	0.6179	0.4442	0.8594	0.00424	0.6492	0.4631	0.9099	0.01215
rs60358788	NA	4	1.6637	0.001026	1.513	1.024	2.233	0.03739	1.928	1.187	3.133	0.008033
rs60383982	CHST12	7	0.7545	0.000586	0.7288	0.5849	0.908	0.004791	0.7849	0.6204	0.993	0.04354
rs60495271	NA	2	0.7281	0.001384	0.7117	0.5459	0.9279	0.01197	0.7476	0.5615	0.9952	0.04625
rs60519986	BACH2	6	0.6308	0.0008512	0.6176	0.3989	0.9562	0.03072	0.6391	0.4526	0.9024	0.01099
rs60623134	OAS1	12	0.5375	2.962e-05	0.52	0.3367	0.8031	0.00319	0.5522	0.3729	0.8177	0.003033
rs6065746	NA	20	1.3419	0.0001999	1.378	1.118	1.698	0.002653	1.299	1.031	1.636	0.0266
rs60726539	PPARGC1B	5	1.3361	0.0003135	1.387	1.118	1.721	0.00292	1.28	1.016	1.612	0.03622
rs6073516	NA	20	1.2805	0.001756	1.293	1.051	1.592	0.01533	1.265	1.003	1.596	0.04683
rs6073519	NA	20	1.2837	0.001601	1.299	1.055	1.601	0.0138	1.265	1.003	1.596	0.04683
rs6079611	MACROD2	20	1.547	0.001569	1.482	1.033	2.125	0.03252	1.635	1.086	2.463	0.01849
rs6086929	NA	20	0.7336	0.002724	0.7411	0.5593	0.982	0.03693	0.7256	0.5419	0.9714	0.03119
rs60912714	DPP10	2	0.677	0.0009781	0.6817	0.5131	0.9058	0.008234	0.6676	0.4468	0.9973	0.04848
rs61088131	NA	19	1.4083	0.0009742	1.36	1.03	1.796	0.03035	1.466	1.088	1.975	0.01195
rs61193653	NA	17	0.7841	0.00252	0.7917	0.6413	0.9774	0.02978	0.7745	0.6104	0.9827	0.03544
rs6128555	NA	20	0.7394	0.0009098	0.7537	0.5948	0.9551	0.01926	0.7211	0.5498	0.9458	0.01813
rs6130672	NA	20	1.33	0.0002945	1.354	1.098	1.67	0.004532	1.302	1.036	1.636	0.02383
rs6138271	NA	20	1.5367	0.001161	1.56	1.092	2.228	0.01442	1.511	1.035	2.204	0.03239
rs61402274	NA	12	1.5552	0.003026	1.542	1.024	2.322	0.03793	1.569	1.035	2.38	0.03388
rs61409948	NA	3	1.5615	0.0005278	1.538	1.062	2.228	0.02272	1.582	1.122	2.231	0.00893
rs61738888	CLASP2	3	1.4559	0.001511	1.379	1.028	1.852	0.03232	1.591	1.091	2.318	0.01572
rs617738	NRG3	10	0.7334	0.000121	0.7873	0.6377	0.972	0.02614	0.6694	0.527	0.8503	0.001007
rs61795309	NA	4	0.6952	0.001979	0.6958	0.4998	0.9687	0.0317	0.6947	0.504	0.9576	0.02612
rs617970	SPP2	2	0.6619	0.001291	0.7336	0.5389	0.9988	0.04911	0.5641	0.3816	0.8338	0.004085
rs617996	AGBL4	1	0.774	0.001151	0.805	0.6558	0.988	0.03799	0.735	0.5811	0.9297	0.01022
rs61800559	LMX1A	1	1.4236	0.003426	1.373	1.007	1.872	0.04522	1.497	1.038	2.158	0.03065
rs61823465	NA	1	0.6152	0.0002859	0.6318	0.4484	0.8901	0.008652	0.5924	0.3939	0.891	0.01192
rs61846909	NA	10	1.3997	0.003088	1.376	1.001	1.891	0.04925	1.423	1.042	1.944	0.02672
rs61889100	NA	11	1.5835	1.853e-05	1.599	1.217	2.101	0.0007538	1.561	1.122	2.171	0.008219
rs61905467	NA	11	1.3025	0.002812	1.316	1.035	1.674	0.02533	1.288	1.003	1.654	0.04693
rs61948973	NA	13	0.6294	0.003972	0.6125	0.3842	0.9765	0.03939	0.644	0.4201	0.9872	0.04349
rs61959132	NA	13	0.6302	0.00272	0.5986	0.3658	0.9793	0.04104	0.65	0.4435	0.9525	0.02715
rs61959133	SLITRK5	13	0.6337	0.003065	0.6075	0.3712	0.9942	0.04736	0.65	0.4435	0.9525	0.02715
rs61959134	SLITRK5	13	0.6302	0.00272	0.5986	0.3658	0.9793	0.04104	0.65	0.4435	0.9525	0.02715
rs62033356	DCUN1D3	16	0.7088	0.005478	0.7826	0.6258	0.9787	0.03166	0.607	0.4393	0.8387	0.002476
rs62084880	NA	18	1.4494	0.001312	1.42	1.05	1.92	0.02269	1.488	1.057	2.095	0.02287
rs62092366	ASXL3	18	0.5918	0.0006092	0.6026	0.4065	0.8932	0.01165	0.5772	0.3631	0.9174	0.0201
rs62092368	ASXL3	18	0.5872	0.0005118	0.6012	0.4055	0.8916	0.01137	0.5684	0.3574	0.9041	0.01703
rs62092391	ASXL3	18	0.5783	0.0005808	0.5483	0.3623	0.8298	0.004478	0.6201	0.386	0.9964	0.04827
rs62111937	NA	19	1.3715	0.001351	1.329	1.024	1.725	0.0325	1.425	1.069	1.9	0.01573
rs62200772	NA	20	0.6587	0.001961	0.6146	0.4153	0.9098	0.01499	0.6978	0.4879	0.9979	0.04869
rs62201601	UNC80	2	0.7533	0.002238	0.7466	0.5752	0.969	0.02805	0.7597	0.5899	0.9784	0.03321
rs62269616	NA	3	1.5493	0.0006487	1.538	1.062	2.228	0.02272	1.559	1.107	2.196	0.0111
rs62292760	MASP1	3	1.3052	0.002077	1.303	1.039	1.634	0.02186	1.308	1.012	1.689	0.04019
rs62363895	IL6ST	5	1.3784	0.002709	1.377	1.031	1.838	0.03028	1.38	1.017	1.871	0.0384
rs62378805	NA	5	0.6269	0.001404	0.6004	0.3906	0.9229	0.02004	0.6489	0.4417	0.9532	0.02751
rs62404212	NA	6	0.7002	0.0004924	0.6617	0.49	0.8934	0.007019	0.7327	0.5597	0.9592	0.0236
rs62407756	RIMS1	6	0.6313	0.0002235	0.5758	0.4006	0.8276	0.002857	0.6813	0.4896	0.948	0.02281
rs62438560	NA	6	1.4138	0.0007145	1.356	1.038	1.772	0.02543	1.492	1.102	2.021	0.009684
rs62441964	NA	7	1.3902	0.0037	1.412	1.021	1.952	0.03714	1.371	1.01	1.861	0.043
rs62580836	RALGPS1	9	1.2729	0.0021	1.239	1.004	1.529	0.04606	1.313	1.048	1.645	0.01782
rs628064	GAREM	18	1.2694	0.002702	1.251	1.017	1.539	0.03364	1.294	1.021	1.64	0.03317
rs636589	L3MBTL4	18	1.4347	0.000862	1.375	1.018	1.856	0.03769	1.497	1.109	2.021	0.008419
rs6430375	NCKAP5	2	1.3206	0.0009119	1.318	1.06	1.638	0.01281	1.324	1.03	1.702	0.02822
rs6430817	NA	2	1.5101	0.003855	1.526	1.016	2.293	0.04172	1.496	1.018	2.197	0.04025
rs6430945	NA	2	0.7392	0.0009022	0.7447	0.5826	0.9519	0.01861	0.7331	0.5653	0.9507	0.01924
rs6443624	PIK3CA	3	0.7486	0.002115	0.7556	0.5824	0.9803	0.0349	0.7415	0.5705	0.9638	0.02536
rs6448772	NA	4	1.3001	0.005097	1.259	1	1.584	0.04973	1.376	1.014	1.868	0.04044
rs6467829	TTC26	7	0.6112	0.0001813	0.6859	0.4787	0.983	0.04002	0.5414	0.3742	0.7833	0.001131
rs6473094	NA	8	1.319	0.001133	1.331	1.065	1.663	0.01201	1.304	1.014	1.677	0.03846
rs6488747	NA	12	0.7797	0.001296	0.7893	0.6428	0.9691	0.02385	0.7683	0.6135	0.962	0.02161
rs6510262	NA	19	1.3668	0.00122	1.359	1.05	1.759	0.01971	1.376	1.041	1.819	0.02473
rs6510299	NA	19	1.3613	0.001406	1.359	1.05	1.759	0.01971	1.364	1.032	1.802	0.02915
rs6536631	FSTL5	4	0.5923	6.943e-05	0.5756	0.4038	0.8204	0.002254	0.6117	0.4198	0.8913	0.0105
rs6543626	NA	2	0.6847	0.002043	0.6678	0.4694	0.9502	0.02486	0.6998	0.5033	0.9729	0.03374
rs6545459	EML6	2	1.3023	0.0009569	1.326	1.075	1.635	0.008378	1.273	1.005	1.611	0.04508
rs6549431	NA	3	1.4858	0.0001369	1.39	1.033	1.871	0.02981	1.576	1.192	2.083	0.001413
rs6550228	CLASP2	3	1.4259	0.002716	1.379	1.028	1.852	0.03232	1.506	1.034	2.194	0.03283
rs6561620	LINC00371	13	1.2806	0.001475	1.239	1.011	1.519	0.03872	1.336	1.061	1.683	0.01363
rs6572422	MDGA2	14	0.7619	0.0006832	0.7509	0.6071	0.9288	0.008257	0.7752	0.6143	0.9782	0.03192
rs6575866	NA	14	1.5504	0.001891	1.529	1.034	2.262	0.03343	1.572	1.063	2.324	0.02334
rs6588360	AGBL4	1	0.7881	0.002396	0.8074	0.6574	0.9915	0.04125	0.7643	0.6063	0.9636	0.02298
rs6588367	AGBL4	1	0.7908	0.002763	0.8074	0.6574	0.9915	0.04125	0.7702	0.6109	0.9711	0.02727
rs6595947	NA	5	1.3613	0.000449	1.373	1.089	1.73	0.007313	1.347	1.041	1.744	0.02348
rs6603971	NA	1	1.2712	0.002763	1.239	1.003	1.531	0.04709	1.312	1.038	1.659	0.02311
rs66523341	MGAT5	2	1.266	0.003205	1.228	1.002	1.505	0.04737	1.324	1.035	1.694	0.02562
rs66571733	NA	19	1.3834	0.001074	1.389	1.065	1.812	0.01548	1.377	1.035	1.832	0.02786
rs6658949	NA	1	1.2712	0.002763	1.239	1.003	1.531	0.04709	1.312	1.038	1.659	0.02311
rs6668803	RPAP2	1	1.2735	0.002543	1.249	1.01	1.544	0.03984	1.304	1.032	1.647	0.0262
rs6674903	DAB1	1	0.7222	5.395e-05	0.6754	0.5415	0.8425	0.0005014	0.7745	0.6179	0.9707	0.02657
rs6676235	NA	1	0.7052	4.264e-05	0.6811	0.5453	0.8507	0.0007111	0.7379	0.5726	0.9508	0.01879
rs667931	NA	15	0.7451	0.001785	0.7647	0.5971	0.9792	0.03343	0.7212	0.5464	0.9517	0.02092
rs6688501	NA	1	0.7851	0.002687	0.7946	0.6432	0.9817	0.03308	0.7732	0.6096	0.9808	0.03399
rs6691306	NA	1	0.6334	0.00276	0.6064	0.3794	0.9693	0.03658	0.6526	0.4427	0.9621	0.03114
rs6693344	AGBL4	1	0.7844	0.002028	0.8075	0.6576	0.9916	0.04128	0.7556	0.5982	0.9543	0.01865
rs6694764	LRP8	1	0.7247	0.000366	0.7059	0.5481	0.909	0.006956	0.7433	0.58	0.9526	0.01908
rs6695948	AGBL4	1	0.7747	0.001368	0.7993	0.6502	0.9824	0.03331	0.7428	0.5847	0.9437	0.01492
rs6703701	AGBL4	1	0.7907	0.002779	0.8073	0.6571	0.9917	0.04146	0.7702	0.6109	0.9711	0.02727
rs6704873	ST6GAL2	2	0.6676	0.001117	0.6556	0.4591	0.9362	0.0202	0.6782	0.4865	0.9456	0.02202
rs6705263	LTBP1	2	0.7635	0.0006402	0.7458	0.6031	0.9223	0.006801	0.7841	0.6252	0.9834	0.03529
rs67092152	NA	19	1.3765	0.001255	1.376	1.056	1.793	0.01829	1.377	1.035	1.832	0.02786
rs6712982	DIS3L2	2	0.6371	0.000123	0.6316	0.46	0.8674	0.004523	0.6433	0.4604	0.8988	0.009728
rs6713298	NA	2	0.7506	0.002486	0.7379	0.5671	0.9601	0.02362	0.7635	0.5873	0.9927	0.0439
rs6722553	DIS3L2	2	0.644	0.001692	0.6316	0.4342	0.9187	0.01623	0.6588	0.44	0.9865	0.04276
rs6723193	XIRP2	2	1.3126	0.0006544	1.334	1.082	1.644	0.006945	1.286	1.016	1.628	0.03649
rs6723376	NA	2	0.7866	0.002725	0.805	0.6517	0.9944	0.04418	0.7644	0.6045	0.9664	0.02476
rs6728029	REEP1	2	1.2837	0.001633	1.254	1.017	1.545	0.03431	1.321	1.047	1.665	0.01872
rs6731093	WDR33	2	0.74	0.001129	0.7661	0.5967	0.9836	0.03666	0.7121	0.5472	0.9265	0.01146
rs6732086	NA	2	0.7581	0.001993	0.7548	0.5932	0.9604	0.02211	0.7618	0.5894	0.9846	0.03764
rs6737883	NA	2	0.7925	0.002234	0.8031	0.6557	0.9837	0.03414	0.7802	0.6262	0.972	0.0269
rs6745958	DIS3L2	2	0.6638	0.0006323	0.6765	0.4895	0.9348	0.01784	0.6498	0.4615	0.9149	0.01353
rs6750523	WDR33	2	0.7293	0.0009208	0.7159	0.5502	0.9314	0.0128	0.7432	0.5703	0.9686	0.02811
rs67546601	NA	3	1.4062	0.0006825	1.325	1.03	1.703	0.02829	1.545	1.126	2.12	0.006988
rs6754853	NA	2	0.7392	0.0009022	0.7447	0.5826	0.9519	0.01861	0.7331	0.5653	0.9507	0.01924
rs6766374	NA	3	0.7215	0.001488	0.7747	0.6024	0.9963	0.0467	0.6355	0.4541	0.8893	0.008179
rs6770917	NA	3	0.7602	0.002796	0.7916	0.6392	0.9802	0.03212	0.6893	0.4944	0.961	0.02818
rs6777621	NA	3	0.7505	0.003681	0.7614	0.5908	0.9814	0.03532	0.7356	0.5452	0.9926	0.04461
rs6780561	NA	3	0.7969	0.003446	0.8109	0.6618	0.9937	0.04329	0.7795	0.6198	0.9805	0.03333
rs6800408	NA	3	0.6259	0.0001826	0.5879	0.4155	0.8319	0.00271	0.6663	0.4709	0.9428	0.02186
rs6807293	NA	3	0.7302	0.001878	0.7525	0.5704	0.9928	0.04429	0.7076	0.5329	0.9396	0.01682
rs6807833	NA	3	0.693	0.0002019	0.7162	0.5587	0.9181	0.008421	0.6587	0.484	0.8966	0.007967
rs6810039	SUSD5	3	1.298	0.0008381	1.282	1.044	1.575	0.01787	1.318	1.049	1.657	0.01795
rs68106411	NA	10	1.4961	0.00114	1.407	1.014	1.951	0.04088	1.613	1.123	2.317	0.009616
rs6816408	NA	4	0.7409	0.002978	0.7816	0.614	0.9948	0.04524	0.6636	0.4694	0.9381	0.02024
rs6824835	NA	4	0.7008	0.001474	0.7345	0.5453	0.9892	0.04223	0.6629	0.4796	0.9164	0.01283
rs6835901	NA	4	0.7382	0.002938	0.7702	0.602	0.9854	0.03777	0.6799	0.4826	0.958	0.02744
rs6847013	FSTL5	4	0.692	0.001528	0.7005	0.521	0.9419	0.01847	0.68	0.4764	0.9708	0.03373
rs6852494	MAPK10	4	0.7917	0.003552	0.8036	0.6478	0.9969	0.04681	0.7785	0.6191	0.979	0.03226
rs6852919	FSTL5	4	0.5937	7.444e-05	0.5572	0.39	0.7961	0.001315	0.6365	0.4382	0.9245	0.01768
rs6857201	NA	4	0.7541	0.005816	0.7793	0.6093	0.9968	0.04709	0.7067	0.5	0.9987	0.04917
rs6859609	NA	5	1.4619	0.0004794	1.402	1.075	1.828	0.0126	1.577	1.103	2.255	0.01245
rs6859980	PPARGC1B	5	1.2854	0.001304	1.279	1.038	1.576	0.02084	1.293	1.032	1.62	0.02522
rs6870870	NA	5	1.3196	0.0006315	1.261	1.01	1.573	0.04032	1.385	1.102	1.741	0.005226
rs6876137	NA	5	1.301	0.0006973	1.253	1.024	1.535	0.0288	1.366	1.085	1.72	0.008047
rs688100	KIFAP3	1	0.7816	0.004797	0.7938	0.6341	0.9938	0.04396	0.765	0.5872	0.9967	0.04717
rs6885331	NA	5	0.7805	0.002982	0.7932	0.6296	0.9992	0.04919	0.7678	0.6089	0.9681	0.02547
rs6886932	NA	5	1.5865	0.001079	1.466	1.006	2.136	0.04626	1.741	1.158	2.619	0.007753
rs6888334	IL6ST	5	1.3784	0.002709	1.377	1.031	1.838	0.03028	1.38	1.017	1.871	0.0384
rs6891628	NA	5	1.4008	0.001959	1.395	1.037	1.878	0.02786	1.407	1.036	1.913	0.02897
rs6893563	NA	5	0.7	0.003947	0.6824	0.4728	0.985	0.04131	0.714	0.5169	0.9862	0.04094
rs6903171	NA	6	0.6892	0.002699	0.649	0.4471	0.9421	0.02299	0.7207	0.5229	0.9933	0.04541
rs6907262	NA	6	0.746	0.0002241	0.7479	0.604	0.926	0.007689	0.7439	0.5928	0.9336	0.01068
rs6913103	NA	6	1.3548	8.337e-05	1.427	1.162	1.753	0.0006911	1.274	1.019	1.594	0.03375
rs6940469	HEY2	6	1.5373	0.001978	1.624	1.087	2.426	0.01801	1.467	1.012	2.125	0.04293
rs6948093	NA	7	1.3656	0.0004231	1.276	1	1.627	0.04983	1.464	1.144	1.873	0.002451
rs6966393	BBS9	7	1.2739	0.001399	1.29	1.052	1.582	0.01442	1.256	1.011	1.559	0.03927
rs6967867	NA	7	0.7432	0.001449	0.7732	0.6021	0.9929	0.04381	0.7104	0.5438	0.9282	0.01221
rs6976827	SDK1	7	1.4396	0.000495	1.403	1.083	1.816	0.01024	1.504	1.074	2.106	0.01756
rs6988109	NRG1	8	0.6193	8.027e-05	0.6636	0.4728	0.9315	0.01778	0.579	0.4144	0.8091	0.001372
rs6989666	WHSC1L1	8	0.6438	0.002853	0.6254	0.4029	0.9708	0.03642	0.6582	0.4483	0.9665	0.03287
rs6997166	NA	8	1.601	0.0002728	1.519	1.077	2.143	0.01719	1.704	1.171	2.478	0.005341
rs6999177	NA	8	1.3424	0.000507	1.352	1.088	1.679	0.006436	1.329	1.027	1.721	0.03067
rs7000626	NA	8	1.3634	0.0001263	1.275	1.023	1.589	0.0309	1.465	1.166	1.84	0.001039
rs7012687	NA	8	1.3447	0.0003441	1.369	1.104	1.697	0.004143	1.313	1.025	1.682	0.03116
rs7022075	NA	9	1.4755	0.003471	1.418	1.038	1.938	0.02826	1.617	1.006	2.598	0.04699
rs7028330	PALM2-AKAP2	9	1.3493	0.0008357	1.363	1.081	1.718	0.0089	1.331	1.016	1.743	0.03768
rs7033724	NA	9	1.3563	0.001026	1.296	1.049	1.6	0.01622	1.547	1.081	2.215	0.0171
rs7036038	RALGPS1	9	1.2721	0.002031	1.255	1.018	1.547	0.03342	1.292	1.033	1.617	0.02469
rs7037263	NA	9	1.2781	0.003398	1.248	1.014	1.536	0.03656	1.33	1.017	1.739	0.03729
rs704424	PRICKLE2	3	1.3892	8.813e-05	1.392	1.126	1.72	0.002226	1.385	1.068	1.797	0.01408
rs707057	GALNT13	2	1.3024	0.002858	1.264	1.001	1.595	0.04869	1.352	1.042	1.755	0.0231
rs7087343	NA	10	1.2936	0.001019	1.294	1.052	1.591	0.01471	1.293	1.028	1.626	0.02818
rs709063	NA	7	1.4148	0.004111	1.386	1.012	1.897	0.04182	1.454	1.013	2.087	0.04235
rs7094668	NA	10	1.4348	0.0016	1.469	1.071	2.014	0.01705	1.401	1.019	1.926	0.03789
rs7095565	NA	10	0.5937	0.002973	0.5315	0.3087	0.915	0.02257	0.6393	0.4099	0.9971	0.04854
rs7099916	NA	10	1.3565	0.001642	1.441	1.082	1.919	0.01255	1.294	1.005	1.667	0.04605
rs7116760	NA	11	0.7288	0.0009782	0.7479	0.5897	0.9486	0.01661	0.6979	0.5132	0.949	0.02182
rs712397	SLC25A21	14	0.7471	0.0003066	0.7167	0.5776	0.8894	0.002487	0.7841	0.6211	0.9898	0.04071
rs7125946	GALNT18	11	0.7334	0.0001012	0.7008	0.5688	0.8634	0.0008388	0.7773	0.614	0.9839	0.03621
rs7131256	NA	11	1.3818	0.001555	1.356	1.021	1.801	0.03567	1.408	1.061	1.869	0.01762
rs7133617	NA	12	1.2961	0.002858	1.262	1.013	1.571	0.03793	1.35	1.03	1.771	0.02981
rs7135579	OAS1	12	0.529	0.0001026	0.5415	0.3317	0.8839	0.01415	0.5198	0.3397	0.7955	0.00258
rs7135928	TMEM132D	12	0.7649	0.0008532	0.7809	0.6339	0.9618	0.02002	0.7442	0.5853	0.9463	0.01595
rs7154943	AKAP6	14	0.7658	0.001721	0.7615	0.6083	0.9533	0.01745	0.7712	0.6012	0.9893	0.0409
rs7158345	NA	14	1.4869	0.002756	1.44	1.002	2.069	0.0488	1.538	1.06	2.232	0.02334
rs71611530	NA	3	1.6665	0.0005675	1.636	1.102	2.43	0.01465	1.703	1.11	2.612	0.01478
rs71635176	PLXNA2	1	0.731	0.001453	0.72	0.5527	0.9378	0.01484	0.7437	0.5609	0.9862	0.0397
rs7169701	AQR	15	0.7906	0.00408	0.8048	0.6506	0.9954	0.04524	0.7722	0.6049	0.9858	0.038
rs7173054	NA	15	0.7493	0.0002176	0.7721	0.6268	0.951	0.01502	0.7237	0.5779	0.9063	0.00485
rs717627	NA	8	1.2984	0.00185	1.304	1.049	1.621	0.01696	1.291	1.005	1.659	0.04593
rs7176853	NA	15	0.7012	0.00295	0.7045	0.5155	0.9629	0.02799	0.6969	0.4895	0.9921	0.0451
rs7178130	HIGD2B	15	0.7754	0.001938	0.7952	0.64	0.988	0.03856	0.7521	0.592	0.9555	0.01966
rs7184680	XYLT1	16	1.3245	0.0004715	1.24	1.005	1.529	0.04443	1.443	1.137	1.833	0.002611
rs7194021	NA	16	0.7157	0.002406	0.696	0.5122	0.9458	0.02054	0.7356	0.5424	0.9975	0.04816
rs7230086	ASXL3	18	0.5724	0.0003929	0.5462	0.3609	0.8265	0.004213	0.6068	0.3823	0.9631	0.03406
rs7236340	NA	18	1.3382	0.0003179	1.26	1.018	1.561	0.03382	1.441	1.137	1.825	0.002509
rs7245236	NA	18	1.2807	0.003204	1.258	1.019	1.553	0.0325	1.317	1.012	1.715	0.0405
rs7246730	NFIC	19	0.7482	0.0005101	0.7607	0.6174	0.9373	0.01024	0.7287	0.56	0.9484	0.01855
rs7247997	NA	19	1.3905	0.0008412	1.391	1.068	1.813	0.0144	1.39	1.047	1.847	0.02285
rs7249122	NA	19	1.3612	0.001344	1.327	1.029	1.711	0.02927	1.404	1.06	1.859	0.01782
rs725191	AGBL4	1	0.7766	0.001343	0.8128	0.6625	0.9972	0.0469	0.7307	0.577	0.9254	0.009219
rs725472	NA	4	0.7155	0.0003843	0.7594	0.6029	0.9566	0.01944	0.6434	0.4727	0.8757	0.005049
rs72580280	NA	6	1.5012	0.001476	1.422	1.052	1.924	0.02214	1.692	1.08	2.649	0.02164
rs7258333	NA	19	1.3743	0.0009943	1.361	1.052	1.76	0.01907	1.39	1.051	1.837	0.02076
rs7258513	NA	19	1.3613	0.001406	1.359	1.05	1.759	0.01971	1.364	1.032	1.802	0.02915
rs72669473	NA	14	1.4699	0.001293	1.457	1.071	1.982	0.0164	1.488	1.035	2.14	0.03177
rs72686739	AGBL4	1	0.7829	0.001846	0.8021	0.6527	0.9857	0.03603	0.7594	0.6023	0.9575	0.01994
rs72718395	TBC1D9	4	0.5188	0.0004812	0.5402	0.3111	0.9381	0.02874	0.5021	0.306	0.8237	0.006379
rs72721642	NA	4	1.637	1.853e-05	1.777	1.321	2.392	0.0001457	1.463	1.034	2.071	0.03178
rs72732048	FBXL7	5	0.6366	0.0004279	0.6376	0.4406	0.9228	0.01704	0.6358	0.4514	0.8955	0.009562
rs72737385	NA	15	1.3272	0.0004599	1.273	1.029	1.575	0.02596	1.398	1.102	1.772	0.00569
rs72750870	PALM2-AKAP2	9	1.3771	0.0008473	1.366	1.075	1.736	0.01068	1.395	1.031	1.888	0.03121
rs72776127	NA	5	0.6246	0.00488	0.6347	0.4062	0.9917	0.04588	0.613	0.3783	0.9934	0.04693
rs72776140	NA	5	0.6035	0.00248	0.6225	0.3986	0.9723	0.03723	0.5821	0.3597	0.9419	0.02756
rs72776148	NA	5	0.6133	0.002689	0.6274	0.4043	0.9736	0.0376	0.5979	0.3757	0.9515	0.03005
rs72830221	PPARGC1B	5	1.3375	0.0003204	1.401	1.128	1.74	0.002286	1.268	1.005	1.599	0.0452
rs72884496	NA	3	1.5265	0.001669	1.506	1.035	2.189	0.03221	1.547	1.067	2.243	0.02138
rs729148	NA	1	1.4387	0.00311	1.453	1.007	2.099	0.04603	1.428	1.037	1.966	0.02902
rs72969814	NA	6	1.5484	0.001179	1.63	1.127	2.358	0.009455	1.467	1.005	2.141	0.04723
rs7297719	NA	12	1.484	0.002026	1.42	1.026	1.966	0.03446	1.583	1.068	2.347	0.02216
rs7298478	SRRM4	12	1.2833	0.002684	1.255	1.002	1.572	0.04798	1.315	1.038	1.664	0.02298
rs7298993	NA	12	1.491	0.001713	1.452	1.05	2.007	0.02407	1.55	1.047	2.294	0.02841
rs72990664	NA	1	1.4266	0.0004759	1.406	1.059	1.866	0.01833	1.447	1.093	1.916	0.009805
rs73016605	NA	19	1.3814	0.001263	1.331	1.019	1.738	0.0362	1.443	1.08	1.928	0.01307
rs73022854	NA	11	0.7142	0.004777	0.701	0.4919	0.9991	0.04943	0.7246	0.5309	0.989	0.04237
rs73053691	CLASP2	3	1.5984	0.0001716	1.554	1.137	2.125	0.005724	1.671	1.129	2.475	0.01034
rs73060480	NA	7	1.4706	0.001126	1.453	1.073	1.968	0.01559	1.496	1.043	2.146	0.02881
rs73070066	NA	5	0.7855	0.003666	0.804	0.6508	0.9933	0.0431	0.7594	0.5884	0.9801	0.03448
rs73100260	MACROD2	20	1.6925	0.001409	1.66	1.079	2.555	0.02116	1.735	1.065	2.825	0.02679
rs73108897	NA	3	0.6535	0.0004325	0.6723	0.5094	0.8872	0.005022	0.6052	0.3836	0.9547	0.03085
rs7312553	STAB2	12	1.3202	0.001029	1.301	1.038	1.63	0.02253	1.343	1.052	1.715	0.01809
rs7313052	TMEM52B	12	1.2906	0.001024	1.291	1.055	1.579	0.01295	1.29	1.023	1.628	0.03174
rs73215103	NA	4	1.6154	0.0009122	1.613	1.087	2.393	0.01752	1.618	1.076	2.431	0.02068
rs73216927	NA	4	1.427	0.0009409	1.435	1.089	1.892	0.01027	1.416	1.022	1.963	0.03658
rs73217820	NA	7	0.6844	0.001673	0.6641	0.4752	0.9283	0.01659	0.7052	0.5048	0.985	0.04051
rs7326616	NA	13	0.7498	0.002142	0.7513	0.5827	0.9685	0.02732	0.7482	0.5733	0.9766	0.03283
rs7331395	HS6ST3	13	0.762	0.0005535	0.7755	0.6281	0.9574	0.01805	0.7466	0.5953	0.9365	0.01147
rs7339509	NA	19	1.3595	0.003125	1.346	1.018	1.779	0.03708	1.375	1.021	1.853	0.03611
rs7340253	NA	2	1.2883	0.00103	1.252	1.019	1.539	0.03248	1.332	1.066	1.664	0.01163
rs73408252	ITPR3	6	0.4903	7.569e-05	0.4664	0.293	0.7425	0.001306	0.5248	0.3052	0.9023	0.01971
rs73461992	NA	18	0.609	0.001066	0.5494	0.3382	0.8923	0.01551	0.6478	0.445	0.9432	0.02351
rs73462000	NA	18	0.6072	0.001001	0.5499	0.3386	0.893	0.01564	0.6445	0.4424	0.9388	0.02209
rs73582390	NCOA7	6	1.4786	0.002709	1.471	1.009	2.146	0.04487	1.485	1.049	2.101	0.02573
rs7372645	NA	3	0.7246	0.00146	0.7462	0.5656	0.9845	0.03842	0.7025	0.5287	0.9333	0.01486
rs742152	CARD10	22	0.7348	0.001351	0.7208	0.554	0.9377	0.01472	0.7499	0.5724	0.9824	0.0367
rs74221798	NA	7	1.2934	0.001528	1.274	1.024	1.583	0.02946	1.316	1.042	1.661	0.02108
rs74321471	NA	6	1.6489	0.0002071	1.728	1.175	2.541	0.005456	1.582	1.101	2.273	0.0132
rs7432729	NA	3	1.3061	0.0007261	1.275	1.026	1.585	0.0281	1.339	1.074	1.67	0.009593
rs74374268	MAPK10	4	0.7923	0.003606	0.8053	0.6499	0.9978	0.04769	0.7777	0.618	0.9785	0.03195
rs74558745	NA	18	0.6099	0.00226	0.6412	0.4351	0.9449	0.02467	0.5511	0.3173	0.9574	0.03448
rs74650297	TC2N	14	1.7564	4.048e-05	1.579	1.088	2.291	0.01615	1.973	1.337	2.912	0.0006176
rs748179	ZMIZ1	10	1.2847	0.002981	1.289	1.027	1.619	0.02879	1.28	1.006	1.628	0.04418
rs74845348	NA	11	1.5767	0.002612	1.524	1.04	2.233	0.03055	1.66	1.037	2.656	0.03476
rs7485574	NA	12	1.4224	0.001886	1.402	1.034	1.902	0.02967	1.446	1.045	2	0.0261
rs74933415	NA	2	1.2723	0.003637	1.245	1.007	1.539	0.04261	1.312	1.019	1.688	0.03516
rs7509970	TSPEAR	21	0.5794	0.001752	0.5997	0.3788	0.9495	0.02917	0.5552	0.3329	0.9261	0.02418
rs75238354	TC2N	14	1.5952	0.0002135	1.456	1.032	2.053	0.03224	1.759	1.232	2.51	0.001862
rs75253181	NA	7	1.5622	0.001416	1.504	1.016	2.224	0.04117	1.62	1.104	2.376	0.01368
rs75270108	NA	4	1.5228	0.0003645	1.55	1.128	2.131	0.006953	1.493	1.066	2.09	0.01964
rs75299535	NA	5	1.5466	0.0003656	1.474	1.049	2.071	0.0253	1.622	1.157	2.275	0.005075
rs7535297	NA	1	0.7045	0.002004	0.7368	0.5544	0.9791	0.03521	0.6566	0.4599	0.9375	0.0206
rs75393286	NA	11	1.5388	0.00172	1.513	1.044	2.194	0.02864	1.568	1.06	2.321	0.0244
rs7543649	AGBL4	1	0.7922	0.003006	0.8074	0.6574	0.9915	0.04125	0.7732	0.613	0.9754	0.02997
rs7546536	NA	1	0.7051	4.286e-05	0.6919	0.5539	0.8643	0.001173	0.7228	0.5607	0.9317	0.01222
rs7547121	NA	1	0.775	0.001324	0.8074	0.6546	0.9959	0.0457	0.7371	0.5845	0.9297	0.009995
rs7557579	ELMOD3	2	1.394	0.0005808	1.382	1.075	1.775	0.01144	1.41	1.057	1.882	0.01953
rs7565174	ST6GAL2	2	0.6944	0.001311	0.6783	0.4832	0.9523	0.02495	0.7068	0.5264	0.9489	0.02095
rs7569393	UNC80	2	1.541	0.001017	1.454	1.016	2.081	0.04081	1.64	1.132	2.377	0.008995
rs7571247	OSBPL6	2	1.5235	0.001801	1.548	1.081	2.217	0.01697	1.495	1.011	2.211	0.04371
rs7572908	DIS3L2	2	0.6425	7.431e-05	0.6098	0.45	0.8263	0.001421	0.6796	0.4958	0.9315	0.01637
rs75752363	DIS3L2	2	0.6083	0.0006828	0.5567	0.3709	0.8356	0.004699	0.6645	0.4432	0.9965	0.04806
rs75756657	TC2N	14	1.7308	4.932e-05	1.59	1.1	2.3	0.01373	1.894	1.295	2.771	0.0009979
rs7575682	AFF3	2	0.7602	0.002512	0.7688	0.609	0.9705	0.02695	0.7485	0.5685	0.9854	0.03893
rs75768891	NA	13	1.5513	0.002754	1.66	1.069	2.578	0.02395	1.475	1.009	2.157	0.04471
rs7582112	TNS1	2	0.7465	0.000695	0.7352	0.5904	0.9154	0.005956	0.7633	0.5856	0.9949	0.04575
rs75951552	ASXL3	18	0.5814	0.0004404	0.5845	0.3921	0.8714	0.0084	0.5772	0.3631	0.9174	0.0201
rs75996833	NA	9	0.561	0.00018	0.6326	0.432	0.9264	0.01865	0.4601	0.2816	0.7519	0.001948
rs76020937	NA	1	0.5465	8.481e-05	0.5946	0.3898	0.9071	0.01585	0.5007	0.3257	0.7696	0.001613
rs7603092	NA	2	1.3465	0.0002425	1.404	1.136	1.736	0.001684	1.276	1.004	1.623	0.04631
rs76044899	NA	2	1.6623	0.000705	1.723	1.159	2.561	0.007171	1.591	1.027	2.466	0.0377
rs7604670	NA	2	1.6743	0.0007051	1.496	1.029	2.175	0.03468	2.037	1.243	3.338	0.004727
rs7608516	NA	2	0.739	0.0008855	0.748	0.5853	0.9559	0.02031	0.7291	0.5624	0.9452	0.01705
rs7611081	NA	3	0.7277	0.00169	0.7525	0.5704	0.9928	0.04429	0.7025	0.5287	0.9333	0.01486
rs76122853	EVA1A	2	1.5048	0.0007611	1.433	1.065	1.929	0.01765	1.642	1.104	2.442	0.01438
rs7612872	MAP3K13	3	0.724	0.001032	0.7702	0.6043	0.9818	0.03497	0.6511	0.4738	0.8947	0.00815
rs7616167	NA	3	1.5818	0.0006863	1.701	1.174	2.462	0.004938	1.466	1.004	2.141	0.04748
rs7616481	NA	3	1.3478	0.0001664	1.307	1.058	1.616	0.01309	1.397	1.111	1.756	0.004182
rs76204971	ITPR3	6	0.503	0.0001109	0.4986	0.3158	0.7873	0.002822	0.5092	0.297	0.8729	0.01411
rs7623055	GRM7	3	0.7654	0.0009269	0.8052	0.6532	0.9926	0.04241	0.7154	0.5618	0.911	0.0066
rs7623852	NA	3	1.2904	0.001488	1.263	1.023	1.561	0.03028	1.325	1.047	1.676	0.01914
rs76260828	NA	3	1.564	0.0007021	1.489	1.012	2.189	0.04314	1.628	1.149	2.308	0.006136
rs76266211	FSTL5	4	0.6115	0.000305	0.5552	0.3832	0.8046	0.001877	0.6785	0.4619	0.9966	0.048
rs76269672	NA	19	1.6737	7.376e-05	1.675	1.199	2.34	0.002483	1.672	1.129	2.478	0.01038
rs76314553	FGF18	5	1.5659	0.0001355	1.66	1.213	2.273	0.001556	1.463	1.043	2.053	0.02775
rs76316987	OLA1	2	1.7984	0.0001375	1.994	1.322	3.007	0.001003	1.594	1.022	2.486	0.03969
rs7632979	NA	3	0.6777	0.002362	0.6847	0.4702	0.9969	0.04811	0.6722	0.48	0.9412	0.02075
rs7635669	PIK3CA	3	0.7307	0.002026	0.7437	0.5634	0.9817	0.03657	0.7172	0.5389	0.9546	0.02269
rs7641643	NA	3	0.7345	0.001431	0.7602	0.5963	0.9691	0.02687	0.696	0.5136	0.9431	0.0194
rs76488132	AGBL4	1	0.7796	0.001569	0.797	0.6489	0.9788	0.03043	0.7575	0.5995	0.9571	0.01995
rs7650212	NR2C2	3	0.7505	0.004718	0.7564	0.5765	0.9925	0.04399	0.7437	0.555	0.9965	0.04732
rs76549616	FBXL7	5	0.6382	0.0004608	0.6283	0.4336	0.9104	0.01405	0.6467	0.4595	0.91	0.01238
rs7657073	NA	4	0.7263	0.0006764	0.7651	0.6072	0.964	0.02314	0.663	0.4882	0.9004	0.008488
rs7658962	FSTL5	4	0.593	6.891e-05	0.5525	0.3863	0.7901	0.00115	0.6398	0.4417	0.9268	0.01816
rs7659948	NA	4	0.6545	0.001064	0.7043	0.5001	0.9918	0.04474	0.5984	0.4099	0.8735	0.007804
rs7664346	NA	4	0.632	0.003464	0.6248	0.4019	0.9711	0.0366	0.6389	0.4159	0.9816	0.0409
rs76644185	PARK2	6	1.3553	0.003992	1.314	1.017	1.699	0.0367	1.436	1.012	2.038	0.04296
rs7667563	NA	4	0.7307	0.001988	0.7607	0.5937	0.9746	0.03052	0.6794	0.4868	0.9481	0.02299
rs76689281	GRIA1	5	1.4576	0.00274	1.433	1.022	2.009	0.03704	1.486	1.037	2.131	0.03113
rs7672495	NA	4	1.3277	0.001127	1.33	1.071	1.652	0.009784	1.324	1.003	1.747	0.04731
rs76737244	NA	1	0.542	6.734e-05	0.5946	0.3898	0.9071	0.01585	0.4925	0.3205	0.7568	0.001233
rs7680631	INPP4B	4	0.769	0.002853	0.7573	0.5915	0.9695	0.02743	0.7803	0.6132	0.993	0.04372
rs76871044	ITPR3	6	0.5003	9.788e-05	0.494	0.3129	0.78	0.002474	0.5092	0.297	0.8729	0.01411
rs7688139	WWC2	4	1.4256	0.001257	1.414	1.063	1.881	0.01734	1.441	1.038	2.001	0.02923
rs76903409	FSTL5	4	0.6702	0.0005193	0.6727	0.4995	0.9059	0.009037	0.6667	0.471	0.9436	0.02217
rs76927417	ITPR3	6	0.5127	0.0001816	0.4988	0.3159	0.7874	0.00283	0.5331	0.3094	0.9186	0.02346
rs76941157	NA	18	0.614	0.002552	0.646	0.4382	0.9523	0.02735	0.5549	0.3207	0.9601	0.03526
rs7699076	NA	4	1.2948	0.001006	1.296	1.059	1.584	0.01167	1.293	1.018	1.642	0.03513
rs7700391	NA	5	1.3069	0.0005939	1.287	1.044	1.587	0.0181	1.33	1.064	1.663	0.0124
rs77075381	KCNB1	20	1.472	0.003892	1.469	1.016	2.124	0.04084	1.475	1.015	2.144	0.04143
rs7712207	NA	5	1.4	0.001881	1.443	1.072	1.944	0.01567	1.357	1.003	1.836	0.04803
rs77184089	NA	17	0.683	0.0008044	0.6704	0.4782	0.9399	0.02037	0.6929	0.515	0.9323	0.01538
rs77262565	NA	1	0.547	9.114e-05	0.5963	0.39	0.9119	0.01704	0.5007	0.3257	0.7696	0.001613
rs77270848	SPATA6	1	1.5275	0.0028	1.549	1.052	2.282	0.02671	1.505	1.01	2.241	0.04457
rs77395994	PALM2-AKAP2	9	1.3771	0.0008473	1.366	1.075	1.736	0.01068	1.395	1.031	1.888	0.03121
rs7740431	NA	6	1.3654	5.428e-05	1.425	1.16	1.75	0.0007353	1.298	1.038	1.623	0.02228
rs77410046	NA	4	1.6928	0.0005815	1.541	1.046	2.269	0.02854	1.95	1.213	3.135	0.005817
rs77491076	NA	2	0.793	0.003235	0.8037	0.655	0.9861	0.03624	0.7791	0.6158	0.9856	0.03748
rs7751017	SMOC2	6	1.7245	6.309e-05	1.654	1.126	2.428	0.01029	1.793	1.237	2.599	0.002048
rs7751508	NA	6	0.7873	0.001824	0.8046	0.6565	0.9861	0.03623	0.7671	0.6138	0.9587	0.01977
rs7752472	ITPR3	6	0.5128	0.0001812	0.4988	0.3159	0.7874	0.00283	0.5332	0.3096	0.9185	0.02342
rs7756747	NA	6	1.3173	0.0005296	1.252	1.023	1.531	0.02908	1.421	1.111	1.818	0.005087
rs7759609	NA	6	0.722	0.00246	0.7598	0.5865	0.9843	0.03752	0.6532	0.4543	0.9391	0.02151
rs77724216	SP3	2	1.405	0.0005327	1.457	1.121	1.895	0.004932	1.347	1.015	1.787	0.03906
rs77746621	NA	13	0.613	0.002412	0.6141	0.3853	0.9788	0.04038	0.6121	0.3982	0.9408	0.02522
rs77762405	BANK1	4	1.5149	0.003944	1.536	1.014	2.325	0.04273	1.497	1.018	2.201	0.04017
rs7786578	IMMP2L	7	0.7144	0.002131	0.7187	0.5358	0.9639	0.02745	0.7096	0.5182	0.9717	0.03246
rs7792638	NA	7	1.2568	0.004002	1.255	1.015	1.551	0.03581	1.259	1.001	1.584	0.04896
rs779800	NA	3	1.3529	0.0002283	1.286	1.035	1.598	0.023	1.439	1.133	1.828	0.002893
rs78083330	NA	12	0.5685	0.001474	0.5833	0.3588	0.9482	0.02968	0.5534	0.336	0.9114	0.02011
rs7810384	HDAC9	7	1.3077	0.002082	1.253	1.001	1.569	0.0493	1.386	1.066	1.802	0.01487
rs7821357	NA	8	1.3583	0.0001589	1.265	1.013	1.58	0.03841	1.463	1.165	1.835	0.001037
rs78274108	CACNB2	10	0.5207	8.877e-05	0.4526	0.2687	0.7624	0.002885	0.5699	0.3751	0.866	0.008442
rs78330318	NA	4	1.6857	0.0007908	1.513	1.024	2.233	0.03739	2	1.225	3.265	0.005556
rs7842239	SGCZ	8	0.7508	0.002439	0.7344	0.5629	0.9583	0.02298	0.7667	0.5922	0.9927	0.04381
rs78457359	ARNTL	11	0.7259	0.002695	0.7321	0.5579	0.9607	0.02451	0.7169	0.5165	0.9952	0.04674
rs7847535	PTPLAD2	9	1.2985	0.003555	1.279	1.002	1.631	0.04791	1.32	1.024	1.701	0.03199
rs78488426	NA	3	1.7378	0.0002714	1.828	1.234	2.709	0.002638	1.624	1.03	2.559	0.03676
rs78511725	PRKAR1B	7	1.3787	0.00228	1.377	1.047	1.81	0.02202	1.381	1.009	1.89	0.04381
rs785631	NA	1	1.4029	0.002266	1.419	1.057	1.906	0.01995	1.384	1.003	1.908	0.04767
rs78802197	NA	11	1.7153	0.0004144	1.719	1.165	2.536	0.006357	1.71	1.069	2.734	0.02514
rs78836818	NA	5	1.4686	0.003012	1.53	1.018	2.3	0.04084	1.431	1.034	1.98	0.03052
rs78903840	SPATA6	1	1.5753	0.001256	1.643	1.12	2.409	0.01103	1.505	1.01	2.241	0.04457
rs78939745	SPATA6	1	1.5659	0.001443	1.624	1.108	2.38	0.01292	1.505	1.01	2.241	0.04457
rs7894517	CHST3	10	0.7496	0.0003715	0.8052	0.6505	0.9967	0.04653	0.6861	0.5411	0.8699	0.001871
rs79003715	NA	15	1.6198	0.00241	1.674	1.085	2.584	0.01992	1.564	1	2.447	0.04999
rs79161397	CACNB2	10	0.5551	0.0007436	0.4489	0.2673	0.7539	0.002462	0.6407	0.4219	0.973	0.03679
rs79227689	FSTL5	4	0.5918	8.957e-05	0.5296	0.3652	0.768	0.0008022	0.6608	0.4562	0.9573	0.02848
rs7926678	SBF2	11	0.7287	0.003219	0.7208	0.5377	0.9662	0.02852	0.7372	0.5447	0.9979	0.04841
rs7932141	GUCY1A2	11	0.7404	0.0002047	0.7817	0.635	0.9623	0.02022	0.6862	0.5366	0.8775	0.002682
rs7938854	NA	11	1.5959	0.001797	1.462	1.013	2.111	0.04268	1.863	1.143	3.035	0.01248
rs79450545	NA	12	0.5735	0.0008788	0.5338	0.321	0.8878	0.01559	0.6034	0.3933	0.9257	0.0207
rs79500165	LRP1B	2	0.6809	0.002864	0.6811	0.4808	0.9648	0.03065	0.6807	0.4716	0.9824	0.03991
rs7959684	NA	12	0.7345	0.0009726	0.7176	0.5532	0.9308	0.0124	0.7516	0.5804	0.9733	0.03038
rs79659066	TP63	3	0.6885	0.002466	0.7085	0.5243	0.9574	0.02487	0.6537	0.4359	0.9802	0.03974
rs796633689	KCNQ5	6	1.6442	0.001132	1.565	1.078	2.272	0.01842	1.799	1.088	2.975	0.02209
rs7968064	BTBD11	12	1.2864	0.003077	1.267	1.023	1.569	0.03	1.317	1.009	1.718	0.043
rs79711557	FGF18	5	1.5856	0.0001094	1.67	1.219	2.288	0.001399	1.488	1.05	2.108	0.02535
rs7973472	NA	12	1.2763	0.001864	1.264	1.022	1.563	0.03086	1.29	1.032	1.611	0.02502
rs7974551	CNOT2	12	0.7959	0.004922	0.8056	0.6497	0.9989	0.04885	0.7843	0.6191	0.9937	0.04417
rs7974933	ERC1	12	0.7499	0.004176	0.7626	0.5856	0.993	0.04423	0.7342	0.5462	0.987	0.04066
rs7975166	NA	12	0.575	0.001958	0.5884	0.362	0.9565	0.03239	0.5608	0.3383	0.9296	0.02489
rs7977441	GRIP1	12	0.6759	0.0018	0.6538	0.4558	0.9378	0.02096	0.6957	0.4971	0.9738	0.03443
rs7984184	NA	13	0.7641	0.0007742	0.7512	0.6065	0.9304	0.008787	0.7794	0.619	0.9814	0.03407
rs79963861	NFIB	9	0.7092	0.005746	0.7458	0.5671	0.9809	0.03592	0.5852	0.3427	0.9992	0.04967
rs79989634	NA	4	1.6394	0.000835	1.484	1.012	2.175	0.04323	1.876	1.202	2.927	0.005577
rs79999795	NA	4	1.6663	0.0007804	1.627	1.095	2.418	0.01597	1.719	1.094	2.701	0.01885
rs8004294	SUPT16H	14	0.7299	0.004648	0.7585	0.5761	0.9986	0.04888	0.6838	0.4781	0.9779	0.03731
rs8004900	NA	14	1.7173	0.0009762	1.696	1.111	2.589	0.01434	1.747	1.065	2.866	0.02707
rs8005260	NA	14	0.6792	0.001342	0.614	0.4226	0.892	0.01049	0.7266	0.5354	0.9862	0.04043
rs80057190	NA	1	0.5572	0.0001493	0.6088	0.398	0.9311	0.02206	0.5089	0.3311	0.7824	0.002083
rs8011945	CHD8	14	0.7307	0.004641	0.7555	0.5734	0.9955	0.04634	0.6919	0.4863	0.9843	0.04055
rs8013649	RPS6KA5	14	0.622	0.0007429	0.6573	0.4412	0.9795	0.03922	0.5913	0.4035	0.8665	0.007033
rs80181885	RAP1B	12	1.5535	0.0005635	1.544	1.113	2.142	0.009287	1.567	1.062	2.311	0.02358
rs8019760	KCNK10	14	1.2786	0.001705	1.282	1.047	1.57	0.01638	1.274	1.007	1.612	0.04332
rs8020586	NA	14	1.299	0.002327	1.288	1.032	1.608	0.02538	1.314	1.015	1.702	0.03825
rs80318151	RPH3A	12	0.5464	0.001473	0.4878	0.2698	0.8821	0.01754	0.5885	0.3645	0.9504	0.03017
rs80339789	FSTL5	4	1.6738	0.0003586	1.693	1.179	2.431	0.004347	1.644	1.044	2.588	0.03179
rs8034111	NA	15	1.3335	0.001222	1.269	1.002	1.607	0.04835	1.415	1.092	1.832	0.008525
rs8036079	NA	15	0.7856	0.002476	0.7897	0.6378	0.9779	0.03041	0.781	0.6211	0.982	0.03441
rs8039390	SH3GL3	15	0.7476	0.003147	0.7439	0.5611	0.9861	0.03967	0.7509	0.5761	0.9787	0.03406
rs8041735	NA	15	0.6488	1.921e-06	0.6329	0.5043	0.7942	7.845e-05	0.6749	0.5065	0.8992	0.007233
rs8042836	NA	15	0.7507	0.0007023	0.771	0.6152	0.9663	0.02399	0.7276	0.5699	0.9291	0.01078
rs805179	TMEM63A	1	1.5333	0.0009256	1.471	1.05	2.06	0.02469	1.618	1.103	2.374	0.01384
rs8069477	ABR	17	1.3184	0.0003219	1.322	1.08	1.618	0.006762	1.314	1.048	1.647	0.01788
rs8092061	ASXL3	18	0.6859	0.0008888	0.6707	0.4968	0.9053	0.009065	0.7049	0.5063	0.9816	0.03844
rs8096451	NA	18	1.351	0.0006473	1.35	1.055	1.728	0.01704	1.352	1.061	1.722	0.01483
rs8104595	NA	19	1.3875	0.001024	1.423	1.091	1.857	0.009286	1.347	1.01	1.797	0.04267
rs8104817	NA	19	1.3153	0.003745	1.298	1.003	1.679	0.04745	1.334	1.022	1.742	0.03406
rs8107879	NA	19	1.3905	0.0008094	1.391	1.069	1.81	0.01387	1.39	1.047	1.847	0.02285
rs8112234	NA	19	1.3653	0.001605	1.37	1.052	1.785	0.0195	1.36	1.024	1.806	0.03374
rs8115818	NA	20	0.7158	0.003831	0.7018	0.5031	0.9789	0.03701	0.7281	0.5342	0.9922	0.0445
rs811722	NA	14	0.7581	0.0004123	0.7276	0.5905	0.8966	0.002838	0.7958	0.6341	0.9988	0.04883
rs8179998	NA	3	1.3098	0.0008472	1.237	1.004	1.525	0.04578	1.415	1.11	1.805	0.005086
rs853276	PRICKLE2	3	1.4308	2.118e-05	1.43	1.156	1.77	0.0009709	1.432	1.102	1.861	0.007182
rs865646	DHFR	5	0.7557	0.001385	0.725	0.5668	0.9273	0.01045	0.786	0.6187	0.9987	0.04875
rs871172	COX19	7	1.2863	0.001954	1.23	1	1.513	0.04994	1.373	1.07	1.763	0.01279
rs876100	ITGBL1	13	1.4274	0.004456	1.382	1.01	1.892	0.04302	1.502	1.014	2.227	0.04268
rs876470	NA	5	0.7702	0.001169	0.7661	0.6191	0.9479	0.01418	0.7752	0.6131	0.9802	0.03345
rs881758	PLXNA2	1	0.7207	0.0009252	0.7309	0.5602	0.9535	0.02085	0.7093	0.5345	0.9412	0.01733
rs886391	NA	6	0.7351	0.001475	0.7651	0.586	0.9988	0.04902	0.7055	0.5385	0.9242	0.01135
rs886985	NA	1	1.3156	0.001703	1.328	1.056	1.67	0.01537	1.3	1.005	1.682	0.04605
rs901949	NA	11	1.505	0.001551	1.451	1.019	2.066	0.03886	1.564	1.088	2.248	0.01565
rs905773	WWOX	16	1.3277	0.0003819	1.287	1.039	1.595	0.02074	1.376	1.095	1.731	0.006281
rs914243	PCBP3	21	0.7525	0.0005337	0.7334	0.5901	0.9115	0.00519	0.7764	0.6111	0.9863	0.03821
rs9195	HEATR2	7	1.3361	0.003407	1.322	1.015	1.72	0.03817	1.353	1.016	1.801	0.03863
rs927906	NA	1	0.7151	0.0002377	0.7717	0.6029	0.9879	0.03972	0.6575	0.5073	0.8522	0.001532
rs9283862	SMOC2	6	1.7283	8.474e-05	1.697	1.146	2.513	0.0083	1.758	1.203	2.569	0.003561
rs9287574	NA	2	1.2719	0.001905	1.261	1.022	1.555	0.03022	1.284	1.03	1.6	0.02604
rs9289785	NA	3	0.6797	0.001599	0.6934	0.494	0.9734	0.03438	0.6663	0.4747	0.9353	0.01894
rs929325	NA	5	1.3635	0.0004595	1.352	1.071	1.706	0.01106	1.378	1.062	1.788	0.01574
rs9295075	SMOC2	6	1.7245	6.309e-05	1.654	1.126	2.428	0.01029	1.793	1.237	2.599	0.002048
rs9295078	SMOC2	6	1.5518	0.001197	1.566	1.057	2.319	0.02533	1.54	1.074	2.21	0.01901
rs9296614	NA	6	0.7646	0.0007252	0.7509	0.6077	0.9279	0.007972	0.781	0.6206	0.9827	0.03493
rs930265	NA	2	1.2868	0.002444	1.25	1.004	1.557	0.04556	1.334	1.045	1.703	0.02085
rs9311973	GRM7	3	1.3542	0.0009916	1.353	1.074	1.704	0.01019	1.356	1.015	1.812	0.03944
rs9313169	NA	5	0.7819	0.002236	0.7936	0.6414	0.9819	0.03334	0.768	0.6073	0.9712	0.02755
rs9319089	NA	13	1.2497	0.005136	1.234	1.004	1.516	0.04605	1.271	1.001	1.614	0.0491
rs9322489	TIAM2	6	1.453	0.0005614	1.477	1.088	2.004	0.01243	1.431	1.065	1.922	0.01742
rs9327734	SLC25A48	5	1.4424	0.0001694	1.478	1.138	1.921	0.003444	1.403	1.061	1.854	0.01743
rs9344653	NA	6	1.5011	0.0003292	1.398	1.044	1.872	0.02452	1.654	1.176	2.326	0.003808
rs9353428	NA	6	1.4239	0.0005724	1.45	1.118	1.88	0.005115	1.386	1.01	1.904	0.04345
rs936111	LRRK1	15	1.4363	0.00149	1.411	1.029	1.936	0.0328	1.462	1.067	2.005	0.01825
rs9371179	NA	6	1.3331	0.0004229	1.272	1.033	1.566	0.02349	1.426	1.111	1.83	0.005268
rs9396808	OFCC1	6	0.6905	0.000376	0.6633	0.504	0.8728	0.003376	0.7257	0.5349	0.9844	0.03933
rs9427047	NA	1	0.7626	0.001912	0.7777	0.6274	0.964	0.02173	0.7369	0.5551	0.9784	0.03477
rs9427499	NA	1	0.7817	0.002187	0.7949	0.6435	0.9818	0.03313	0.7654	0.6042	0.9697	0.02676
rs944054	N6AMT2	13	1.4809	0.0007065	1.425	1.007	2.017	0.04571	1.524	1.129	2.057	0.005972
rs945184	LRP8	1	0.6964	4.813e-05	0.7011	0.5517	0.891	0.003692	0.6912	0.536	0.8915	0.00445
rs9456814	PACRG	6	0.7294	0.0001153	0.7006	0.5653	0.8682	0.001152	0.7676	0.6031	0.9771	0.03173
rs9458896	NA	6	1.3227	0.0003655	1.358	1.103	1.671	0.003861	1.281	1.019	1.611	0.03397
rs9466303	NA	6	0.6882	0.000269	0.6615	0.4901	0.8929	0.006936	0.7108	0.5421	0.932	0.01353
rs9473524	NA	6	0.7538	0.000382	0.7229	0.5833	0.8958	0.00302	0.7901	0.6295	0.9916	0.04204
rs9506831	NA	13	0.7532	0.0004047	0.7357	0.5938	0.9115	0.004986	0.7741	0.6145	0.9751	0.02971
rs9519784	NA	13	1.2877	0.001543	1.293	1.048	1.595	0.01641	1.281	1.013	1.62	0.03878
rs9520999	MYO16	13	1.3578	0.001551	1.389	1.067	1.806	0.01447	1.325	1.009	1.741	0.04314
rs9528682	NA	13	1.4994	0.0003843	1.524	1.108	2.097	0.009581	1.476	1.079	2.019	0.01491
rs9539873	NA	13	1.5036	0.0003633	1.533	1.112	2.113	0.00902	1.476	1.079	2.019	0.01491
rs9549830	NA	13	1.5019	0.0002815	1.435	1.054	1.953	0.0217	1.574	1.151	2.151	0.004477
rs9550379	NA	13	1.262	0.00285	1.246	1.014	1.532	0.03601	1.282	1.02	1.61	0.03287
rs9559667	NA	13	1.4429	0.0002025	1.409	1.079	1.841	0.01187	1.481	1.119	1.96	0.005976
rs9561651	NA	13	0.7687	0.00152	0.7765	0.6268	0.962	0.02067	0.7581	0.5905	0.9733	0.02986
rs9563679	NA	13	0.7471	0.004204	0.7767	0.6128	0.9843	0.03654	0.6795	0.4692	0.9841	0.04088
rs9563801	NA	13	1.5024	0.004874	1.509	1.009	2.256	0.04516	1.496	1.003	2.23	0.04824
rs9580356	NA	13	0.7641	0.0007742	0.7512	0.6065	0.9304	0.008787	0.7794	0.619	0.9814	0.03407
rs9584244	NA	13	0.753	0.001219	0.7589	0.5996	0.9605	0.02172	0.7463	0.5804	0.9597	0.02255
rs9633984	NA	11	1.5154	0.001854	1.533	1.064	2.209	0.02192	1.497	1.029	2.178	0.03503
rs9635758	NA	17	1.3106	0.0009818	1.303	1.054	1.611	0.01432	1.321	1.031	1.691	0.02751
rs9636059	NA	18	0.6159	0.002696	0.6469	0.4388	0.9534	0.02775	0.5584	0.3228	0.9659	0.03717
rs9647543	NA	5	0.7546	0.000311	0.7626	0.624	0.932	0.008104	0.7435	0.5866	0.9424	0.01428
rs9660278	ELAVL4	1	0.8013	0.004766	0.8082	0.6577	0.9931	0.04283	0.7927	0.6291	0.9989	0.04891
rs9668466	NA	12	0.7755	0.0009873	0.7791	0.634	0.9575	0.01762	0.7713	0.6173	0.9636	0.02226
rs9675696	NA	18	0.5726	0.001275	0.5686	0.351	0.9211	0.0218	0.5766	0.3579	0.929	0.02367
rs9677267	CAPG	2	1.4131	0.001416	1.337	1.015	1.762	0.03913	1.531	1.098	2.134	0.01203
rs9681584	NA	3	0.5255	0.0003501	0.4931	0.2804	0.8672	0.0141	0.5473	0.3484	0.8598	0.008916
rs971891	NA	5	0.7387	0.001543	0.72	0.5506	0.9415	0.01637	0.757	0.5823	0.984	0.03747
rs973810	ROBO1	3	0.7392	0.004432	0.7593	0.5776	0.9982	0.04849	0.7123	0.5167	0.9819	0.03832
rs9791086	IL6ST	5	1.2925	0.001143	1.238	1.002	1.53	0.04761	1.358	1.082	1.703	0.008152
rs9791681	CHST12	7	0.7542	0.0005759	0.727	0.5835	0.9059	0.004499	0.7866	0.6219	0.9951	0.04536
rs979423	NA	11	1.6696	0.0009109	1.675	1.128	2.487	0.01051	1.662	1.037	2.665	0.03477
rs9800105	NA	5	1.4521	0.0006804	1.435	1.098	1.875	0.00817	1.484	1.033	2.132	0.03263
rs9806341	NA	15	0.6576	2.668e-06	0.6126	0.488	0.7691	2.421e-05	0.7286	0.5541	0.9582	0.02349
rs9808907	NA	3	1.3281	0.0003321	1.278	1.031	1.584	0.02496	1.385	1.107	1.732	0.004403
rs9810286	NA	3	1.3006	0.0009132	1.281	1.032	1.59	0.02456	1.322	1.057	1.654	0.01438
rs9815096	CPB1	3	0.6895	8.259e-05	0.6521	0.5005	0.8496	0.001536	0.7273	0.5613	0.9424	0.01602
rs9816458	NA	3	0.7174	0.0001034	0.7065	0.567	0.8803	0.001958	0.7328	0.5655	0.9496	0.01872
rs9818310	CADPS	3	1.4446	0.0001027	1.451	1.119	1.882	0.00495	1.438	1.103	1.874	0.007242
rs982443	GUCY1A2	11	0.735	0.001263	0.7824	0.6229	0.9827	0.03487	0.6458	0.4652	0.8963	0.008946
rs9830137	TP63	3	0.7189	0.00212	0.7355	0.571	0.9474	0.01741	0.683	0.4677	0.9976	0.04855
rs9831801	NA	3	0.7451	0.0009651	0.8085	0.6546	0.9986	0.04848	0.676	0.5343	0.8553	0.001103
rs9832849	NA	3	1.3281	0.0003321	1.278	1.031	1.584	0.02496	1.385	1.107	1.732	0.004403
rs9833438	NA	3	0.7246	0.00146	0.7462	0.5656	0.9845	0.03842	0.7025	0.5287	0.9333	0.01486
rs9837075	NA	3	0.6212	0.001101	0.5938	0.3762	0.9373	0.02522	0.6395	0.4431	0.9229	0.01691
rs9839727	MAP3K13	3	0.6043	0.001706	0.6391	0.4168	0.98	0.04011	0.5656	0.3553	0.9003	0.01627
rs9841051	PIK3CA	3	0.7431	0.001572	0.7533	0.581	0.9767	0.03254	0.7329	0.5645	0.9515	0.01963
rs9842869	NA	3	1.2928	0.001152	1.307	1.056	1.618	0.01379	1.277	1.02	1.6	0.03315
rs9848642	EPHA6	3	0.5976	0.003096	0.6176	0.3852	0.9902	0.04542	0.5764	0.3519	0.9441	0.02864
rs9862748	EPHA6	3	0.5969	0.003203	0.6176	0.3852	0.9902	0.04542	0.5746	0.3487	0.9467	0.02962
rs9866090	FOXP1	3	1.355	0.001462	1.348	1.042	1.744	0.0229	1.363	1.038	1.791	0.0259
rs9873216	PRICKLE2	3	1.2435	0.005052	1.226	1	1.503	0.04975	1.266	1.006	1.592	0.04419
rs9876219	NA	3	1.2928	0.001165	1.286	1.043	1.587	0.01866	1.301	1.034	1.638	0.02489
rs9881887	PIK3CA	3	0.7295	0.001845	0.7416	0.5618	0.9789	0.03484	0.7171	0.5399	0.9524	0.02164
rs9894851	PRKCA	17	0.606	0.002192	0.571	0.3435	0.9492	0.03068	0.6303	0.417	0.9526	0.02851
rs9910471	UBE2O	17	0.7617	0.002959	0.7714	0.6097	0.9758	0.03048	0.7483	0.5667	0.9881	0.0409
rs9920633	LINGO1	15	1.4446	5.946e-05	1.568	1.269	1.938	3.171e-05	1.304	1.022	1.664	0.03258
rs9923762	WWOX	16	1.3289	0.0003684	1.289	1.044	1.592	0.01852	1.379	1.092	1.74	0.00686
rs9941223	WWOX	16	1.3355	0.0003031	1.287	1.04	1.592	0.02005	1.396	1.106	1.762	0.004941
rs9945476	RAB31	18	0.7586	0.0009383	0.7822	0.6343	0.9646	0.02159	0.723	0.5562	0.9398	0.01535
rs9957452	L3MBTL4	18	1.2532	0.004063	1.24	1.003	1.533	0.0471	1.268	1.014	1.586	0.03749
rs9958901	NA	18	0.6523	0.002677	0.5916	0.3713	0.9426	0.0272	0.6889	0.4862	0.976	0.03602
rs9960655	MYO5B	18	1.6528	0.0007351	1.694	1.134	2.532	0.01012	1.608	1.052	2.457	0.02822
rs9960886	NA	18	1.2833	0.00136	1.237	1.005	1.523	0.04434	1.34	1.069	1.678	0.011
rs9974382	NA	21	0.7919	0.004249	0.7991	0.6387	0.9998	0.04983	0.7844	0.6242	0.9858	0.03726
rs9980752	SLC19A1	21	0.7511	0.003619	0.7655	0.5898	0.9935	0.04453	0.734	0.5511	0.9776	0.03443
rs999881	NA	14	0.7674	0.0006749	0.7772	0.6337	0.9533	0.01556	0.7552	0.6002	0.9503	0.01661
