# Supplementary material for: Metabo-Endotypes of Asthma Reveal Clinically Important Differences in Lung Function: Discovery and validation in two TOPMed Cohorts
Source: Research Square preprint supplement (doi:10.21203/rs.3.rs-358819/v1), 2021-03-31
Supplement: Supplementary file 4 [file b29ac77a70f38befe30355cb.xls]

## Sheet: eTable8
Metabolite	HMDB	Super Pathway	GACRS Coefficient	GACRS P-value	CAMP Coefficient	GACRS P-value	Meta-analyzed Coefficient	Meta-analyzed P-value
3-Hydroxybutyric acid	HMDB0000357	Amino Acid	2.14586	1.83415e-46	1.90423	7.70049e-41	2.02505	4.64193e-63
Xanthurenic acid	HMDB0000881	Amino Acid	-0.312048	4.16435e-05	-0.24691	0.00424432	-0.279479	4.712e-06
cyclic-AMP	HMDB0000058	Energy	0.392734	8.14517e-07	0.394536	1.10452e-05	0.393635	5.56935e-10
5-Oxo-ETE	HMDB0010217	Lipid	0.754061	4.16494e-18	0.449116	8.57934e-07	0.601588	7.96166e-05
AMP	HMDB0000045	Nucleotide	-0.259728	0.000826758	-0.247578	0.00366115	-0.253653	2.54803e-05
Acetoacetic acid	HMDB0000060	Lipid	0.56919	1.97081e-12	0.628369	1.13069e-11	0.598779	5.76141e-20
Allantoin	HMDB0000462	Nucleotide	-0.704207	2.33293e-18	-0.782983	1.63251e-16	-0.743595	1.64967e-28
CDP-Choline	HMDB0001413	Cofactors and Vitamins	-0.36114	2.07972e-06	-0.438377	9.86326e-08	-0.399758	6.29869e-12
DHA	HMDB0062579	Lipid	0.871795	1.56262e-23	1.02002	7.983e-24	0.945907	2.62948e-37
Glycerol-3-phosphate	HMDB0000126	Lipid	-0.55228	4.56983e-09	-0.501419	3.34726e-07	-0.526849	3.39222e-14
Glycochenodeoxycholic acid	HMDB0000637	Lipid	-1.09927	1.48429e-31	-1.33837	1.20773e-32	-1.21882	2.08783e-24
Glycocholic acid	HMDB0000138	Lipid	-1.11955	6.94816e-32	-1.25745	5.19538e-30	-1.1885	2.91365e-52
2-Hydroxybutyric acid	HMDB0000008	Amino Acid	1.05805	1.59429e-27	0.827292	8.42281e-17	0.94267	3.07684e-16
Indole-3-carboxylic acid	HMDB0003320	Amino Acid	0.722981	2.57168e-17	0.53969	2.85823e-09	0.631336	5.62289e-12
Linoleic acid	HMDB0000673	Lipid	1.35094	3.93418e-38	2.11429	3.4989e-39	1.73262	5.63853e-06
N-Acetyl-L-Alanine	HMDB0000766	Amino Acid	0.366272	4.11791e-06	0.27587	0.000856828	0.321071	4.0852e-08
N-Acetyl-L-Glutamic acid	HMDB0001138	Amino Acid	-0.621923	4.14185e-12	-0.744069	1.82662e-14	-0.682996	2.60751e-23
N-Oleoyl Taurine	CAS:52514-04-2	Amino Acid	1.14867	1.70281e-33	1.09028	1.47062e-25	1.11947	5.27887e-52
N-Palmitoyl Taurine	CAS:83982-06-3	Amino Acid	0.882595	1.86133e-23	0.866846	2.72394e-18	0.874721	1.44522e-35
Oleoyl Glycine	HMDB0013631	Amino Acid	1.56237	1.33519e-41	1.60651	2.84097e-35	1.58444	5.99538e-67
Palmitic acid	HMDB0000220	Lipid	1.19642	2.82501e-31	1.63841	1.16373e-32	1.41742	1.41939e-10
Pseudouridine	HMDB0000767	Nucleotide	0.289917	0.000493999	0.290761	0.00188778	0.290339	1.1436e-05
Pyroglutamic acid	HMDB0000267	Amino Acid	-0.368619	1.16593e-05	-0.238702	0.00612858	-0.303661	2.94405e-06
Taurocholic acid	HMDB0000036	Lipid	-0.836033	1.00577e-20	-0.942365	2.12945e-21	-0.889199	8.13062e-37
LPC(22:6)	HMDB0010404	Lipid	-0.293961	0.000182386	-0.312045	0.00027455	-0.303003	5.85001e-07
LPE(18:2)	HMDB0011507	Lipid	-1.08611	1.1753e-31	-1.19965	5.46678e-28	-1.14288	2.07276e-49
LPE(16:0)	HMDB0011503	Lipid	-1.19882	3.29838e-32	-1.1837	5.35279e-27	-1.19126	6.2383e-53
PC(30:1)	HMDB0007870	Lipid	-0.466997	1.03358e-08	-0.36442	3.93446e-05	-0.415709	3.29949e-11
PC(30:0)	HMDB0007869	Lipid	-0.402004	5.24375e-07	-0.334136	0.000122497	-0.36807	2.18029e-09
PC(36:4)_A	HMDB0007983	Lipid	-0.62122	3.08752e-15	-0.609735	8.20654e-12	-0.615477	1.72112e-22
PE(36:3)	HMDB0009060	Lipid	-1.08918	2.64068e-30	-1.41719	3.22962e-33	-1.25319	2.15377e-14
SM(d18:1/18:0)	HMDB0001348	Lipid	0.300001	0.000174015	0.205221	0.018911	0.252611	4.38646e-05
PE(40:6)	HMDB0009012	Lipid	-0.292715	5.19746e-05	-0.233642	0.00376752	-0.263178	3.93276e-06
PC(36:2)	HMDB0008039	Lipid	-0.374683	5.81438e-07	-0.569962	2.84254e-10	-0.472322	1.3154e-06
PE(38:4)	HMDB0009003	Lipid	-0.271099	0.0005288	-0.303183	0.000331256	-0.287141	1.52611e-06
PE(P-36:2)/PE(O-36:3)	HMDB0011441	Lipid	-0.213731	0.00747909	-0.321264	0.000270057	-0.267498	1.79398e-05
PC(38:2)	HMDB0008270	Lipid	-0.329149	2.56785e-05	-0.264813	0.00234297	-0.296981	1.39249e-06
DG(34:0)	HMDB0007100	Lipid	-1.29099	6.04531e-29	-1.06693	1.76393e-17	-1.17896	6.70789e-26
DG(36:0)	HMDB0007158	Lipid	-0.691766	1.28972e-09	-0.516737	2.12731e-07	-0.604251	5.03432e-12
TG(46:4)	HMDB0042548	Lipid	-1.22139	1.31473e-33	-1.26306	8.80214e-29	-1.24222	4.5319e-54
TG(44:2)	HMDB0042279	Lipid	-1.17373	3.96291e-32	-1.21013	2.12578e-28	-1.19193	1.74443e-53
TG(42:0)	HMDB0072780	Lipid	-0.942049	5.26524e-24	-1.06144	1.27185e-21	-1.00174	3.16225e-37
TG(50:5)	HMDB0010471	Lipid	-1.00101	5.32935e-28	-0.781267	9.03764e-17	-0.891138	5.03119e-16
TG(46:2)	HMDB0010419	Lipid	-1.14601	2.14773e-32	-1.01736	4.53161e-24	-1.08169	2.77561e-52
TG(45:1)	HMDB0042099	Lipid	-0.76514	6.29704e-18	-0.828698	5.69288e-20	-0.796919	1.51062e-35
TG(44:0)	HMDB0042063	Lipid	-0.955358	1.0749e-25	-0.994534	1.59597e-22	-0.974946	9.40912e-42
CE(22:6)	HMDB0006733	Lipid	0.966977	2.1904e-20	0.735799	1.20675e-12	0.851388	1.76281e-13
TG(49:2)	HMDB0011706	Lipid	-0.718133	7.77476e-18	-0.531465	4.24892e-10	-0.624799	2.168e-11
CE(20:4)	HMDB0006726	Lipid	1.17963	6.82066e-22	0.990295	1.36011e-16	1.08496	2.07169e-30
TG(48:1)	HMDB0005359	Lipid	-0.947898	4.5603e-26	-0.901115	7.48313e-21	-0.924506	4.56706e-42
TG(51:3)	HMDB0011701	Lipid	-0.708284	2.60582e-18	-0.46535	5.39872e-08	-0.586817	1.35793e-06
CE(22:5)	HMDB0010375	Lipid	1.21427	3.11011e-19	0.90088	2.33472e-11	1.05758	1.48655e-11
TG(49:1)	HMDB0011705	Lipid	-0.951671	3.5136e-24	-0.827353	1.30441e-17	-0.889512	1.39834e-38
TG(48:0)	HMDB0005356	Lipid	-1.13285	1.37781e-32	-0.891419	1.14858e-19	-1.01214	5.09714e-17
CE(20:3)	HMDB0006736	Lipid	1.06606	2.60457e-23	0.884124	1.71687e-15	0.975091	8.27219e-27
TG(51:2)	HMDB0005362	Lipid	-0.958518	8.95935e-24	-0.700905	2.25336e-13	-0.829711	1.18285e-10
TG(53:3)	HMDB0043058	Lipid	-0.429259	1.69041e-08	-0.259966	0.00196049	-0.344612	4.67723e-05
CE(16:0)	HMDB0000885	Lipid	1.24416	1.01543e-22	1.23727	7.69965e-19	1.24071	3.05181e-36
TG(49:0)	HMDB0042095	Lipid	-0.993805	1.06417e-26	-1.03304	2.9961e-23	-1.01342	3.34549e-43
TG(52:2)	HMDB0005369	Lipid	-0.89186	3.34615e-25	-0.706831	6.23408e-15	-0.799346	5.60892e-18
TG(56:4)	HMDB0005398	Lipid	-0.575091	5.18696e-12	-0.428213	1.62748e-06	-0.501652	8.43918e-12
TG(54:2)	HMDB0005403	Lipid	-1.29617	3.65206e-36	-1.26832	2.78903e-29	-1.28224	4.7764e-58
TG(52:0)	HMDB0005365	Lipid	-1.38626	2.08113e-38	-1.41459	6.6893e-29	-1.40043	5.40018e-55
TG(56:1)	HMDB0005396	Lipid	-1.58868	2.58893e-38	-1.4439	3.89391e-32	-1.51629	9.28688e-69
TG(56:2)	HMDB0005404	Lipid	-1.57244	2.49464e-38	-1.50741	6.08337e-30	-1.53993	1.31896e-60
TG(54:1)	HMDB0005395	Lipid	-1.42344	5.84184e-38	-1.38928	2.40024e-31	-1.40636	2.07294e-62
TG(56:3)	HMDB0005410	Lipid	-1.29339	3.71101e-33	-1.23298	1.3044e-24	-1.26318	8.43094e-50
TG(51:0)	HMDB0031106	Lipid	-1.01652	3.05885e-26	-0.868361	1.51869e-15	-0.942439	1.87407e-34
TG(55:3)	HMDB0042466	Lipid	-0.646582	1.34989e-15	-0.523899	2.22648e-09	-0.58524	3.46137e-21
TG(52:1)	HMDB0005367	Lipid	-1.25147	1.26548e-36	-1.16124	1.70731e-29	-1.20635	1.19669e-61
TG(53:2)	HMDB0042196	Lipid	-0.760832	1.72158e-19	-0.545276	1.14618e-09	-0.653054	1.36768e-09
TG(50:0)	HMDB0005357	Lipid	-1.33518	1.56904e-38	-1.24757	8.05146e-27	-1.29138	1.6311e-55
TG(54:3)	HMDB0005405	Lipid	-1.01913	2.39244e-29	-0.955971	1.71192e-21	-0.98755	5.52329e-44
TG(51:1)	HMDB0042104	Lipid	-1.00844	4.22666e-25	-0.713926	2.28647e-13	-0.861182	4.9696e-09
CE(18:1)	HMDB0000918	Lipid	1.19906	1.15311e-23	1.20108	1.70654e-18	1.20007	2.62928e-35
CE(22:4)	HMDB0006729	Lipid	0.883365	5.26653e-15	0.728869	6.25854e-11	0.806117	1.5296e-24
TG(50:1)	HMDB0005360	Lipid	-1.03223	2.35153e-29	-0.881926	9.28195e-20	-0.957076	3.74885e-37
TG(54:4)	HMDB0005370	Lipid	-0.622672	3.11852e-14	-0.670928	1.64563e-13	-0.6468	8.77563e-24
TG(52:3)	HMDB0005384	Lipid	-0.748248	6.73725e-20	-0.488716	1.39461e-08	-0.618482	1.87795e-06
CE(18:2)	HMDB0000610	Lipid	1.20609	1.51852e-23	0.978603	2.10851e-15	1.09234	7.71327e-22
TG(50:2)	HMDB0005377	Lipid	-1.04535	1.49948e-28	-0.735795	4.34835e-15	-0.890574	8.72215e-09
TG(47:0)	HMDB0042094	Lipid	-0.945874	1.38943e-23	-0.963412	1.26017e-20	-0.954643	6.47129e-39
CE(16:1)	HMDB0000658	Lipid	0.547467	3.71087e-10	0.415859	4.69267e-06	0.481663	2.48595e-13
TG(54:5)	HMDB0005385	Lipid	-0.674508	7.36495e-15	-0.638903	3.98483e-12	-0.656706	6.44929e-24
TG(46:0)	HMDB0010411	Lipid	-0.858778	9.35026e-24	-0.858522	7.93494e-21	-0.85865	5.17313e-40
CE(18:3)	HMDB0010370	Lipid	0.473272	9.67797e-09	0.509518	5.48822e-08	0.491395	1.2396e-13
TG(50:3)	HMDB0005433	Lipid	-0.863358	1.16005e-23	-0.541938	1.99137e-10	-0.702648	1.23029e-05
TG(47:1)	HMDB0042100	Lipid	-0.642575	7.51282e-15	-0.646877	2.79842e-14	-0.644726	7.97334e-27
TG(54:6)	HMDB0005391	Lipid	-0.579672	4.96566e-11	-0.352114	6.69476e-05	-0.465893	4.22677e-05
TG(48:2)	HMDB0005376	Lipid	-0.964686	1.61425e-27	-0.747594	7.87347e-17	-0.85614	3.08689e-15
TG(45:0)	HMDB0042093	Lipid	-0.506012	1.71352e-10	-0.636736	1.26226e-13	-0.571374	2.29687e-18
TG(49:3)	HMDB0042103	Lipid	-0.838979	1.60677e-22	-0.533185	3.12613e-10	-0.686082	7.21586e-06
TG(46:1)	HMDB0010412	Lipid	-0.960205	7.5143e-27	-0.904003	1.26653e-21	-0.932104	4.21284e-44
TG(47:2)	HMDB0042076	Lipid	-0.864395	4.48501e-22	-0.801323	2.70492e-18	-0.832859	1.23566e-37
TG(43:0)	HMDB0042062	Lipid	-0.771975	3.11124e-17	-0.834643	1.32021e-18	-0.803309	4.34577e-33
TG(44:1)	HMDB0042301	Lipid	-1.02402	5.59623e-28	-1.04322	3.89787e-25	-1.03362	1.01737e-47
TG(45:2)	HMDB0043170	Lipid	-0.974666	7.37901e-25	-0.870255	2.2473e-21	-0.92246	5.94207e-46
TG(50:6)	HMDB0010497	Lipid	-1.02164	1.93242e-27	-0.80361	1.34606e-16	-0.912624	5.68317e-17
TG(46:3)	HMDB0042751	Lipid	-1.2143	1.70824e-33	-1.14934	2.63493e-26	-1.18182	1.01353e-53
TG(43:1)	HMDB0042098	Lipid	-0.916511	2.89615e-23	-0.991636	2.46463e-26	-0.954073	2.62004e-47
TG(48:5)	HMDB0042789	Lipid	-1.15023	3.14693e-31	-1.0237	2.94866e-22	-1.08697	4.42086e-48
TG(41:0)		Lipid	-0.801475	1.52395e-20	-0.843199	1.24046e-19	-0.822337	7.15771e-36
TG(45:3)		Lipid	-1.02817	8.0306e-29	-0.954153	3.82435e-24	-0.991161	3.80226e-50
TG(43:2)	HMDB0043169	Lipid	-0.985813	1.50471e-27	-0.969595	8.1368e-25	-0.977704	1.02638e-48
DG(36:1)	HMDB0007216	Lipid	-1.2931	1.09382e-33	-1.12652	7.44705e-17	-1.20981	9.10802e-37
DG(38:4)	HMDB0007170	Lipid	-0.260152	0.00083346	-0.31101	0.000355104	-0.285581	3.52244e-06
PE(36:1)	HMDB0008993	Lipid	-1.04888	2.71166e-28	-1.30336	9.02431e-31	-1.17612	2.3877e-20
PC(36:1)	HMDB0008038	Lipid	-0.400129	8.45359e-07	-0.423398	2.74906e-06	-0.411764	1.12843e-10
PC(34:0)	HMDB0007970	Lipid	-0.295297	0.000181696	-0.239233	0.00586885	-0.267265	1.34462e-05
PE(36:2)	HMDB0008994	Lipid	-1.30152	1.37681e-35	-1.40489	8.26523e-33	-1.3532	2.20587e-59
DG(32:1)	HMDB0007099	Lipid	-1.09081	4.21928e-28	-0.672491	9.75188e-12	-0.881652	2.49586e-05
PE(P-34:2)/PE(O-34:3)	HMDB0011343	Lipid	-0.23053	0.00275697	-0.297963	0.000379179	-0.264246	8.2886e-06
PE(38:2)	HMDB0008942	Lipid	-0.291508	0.00015101	-0.262699	0.00250535	-0.277103	6.50939e-06
PE(38:5)	HMDB0009069	Lipid	-0.393503	1.0385e-06	-0.404931	3.26279e-06	-0.399217	8.68462e-11
PE(36:4)	HMDB0008937	Lipid	-0.374152	3.82849e-06	-0.423589	6.72961e-07	-0.39887	3.66166e-11
PE(34:2)	HMDB0008928	Lipid	-0.890463	3.87076e-24	-0.997691	4.67537e-24	-0.944077	9.34666e-42
PE(P-44:12)/PE(O-44:13)		Lipid	-0.580022	4.48077e-14	-0.50727	1.83895e-09	-0.543646	8.15647e-20
PS(34:0)	HMDB0012356	Lipid	-0.264375	0.000535499	-0.251259	0.00375376	-0.257817	2.6042e-05
PC(32:2)	HMDB0007874	Lipid	-0.389367	6.75739e-07	-0.254088	0.00338339	-0.321728	1.96966e-06
PE(32:0)	HMDB0008923	Lipid	-0.391826	3.80021e-07	-0.25784	0.00173452	-0.324833	1.24244e-06
LPE(18:0)	HMDB0011130	Lipid	-0.908371	3.37252e-22	-1.01165	2.34375e-21	-0.96001	3.83632e-37
LPC(18:0)	HMDB0010384	Lipid	-0.726164	8.88216e-16	-0.626113	2.44799e-10	-0.676139	4.14088e-22
oleoyl-EA	HMDB0002088	Lipid	1.39162	2.96608e-36	1.70358	7.5426e-35	1.5476	3.34822e-23
LPE(18:1)	HMDB0011506	Lipid	-1.27551	3.25542e-35	-1.37954	3.5541e-31	-1.32753	2.94105e-56
LPC(16:0)	HMDB0010382	Lipid	-0.820666	2.76353e-18	-0.82323	2.69931e-15	-0.821948	6.35344e-29
LPE(20:4)	HMDB0011517	Lipid	-0.472747	9.63136e-10	-0.426144	5.81632e-07	-0.449446	9.08501e-14
LPC(20:4)	HMDB0010395	Lipid	-0.510757	5.60808e-10	-0.496523	4.1982e-08	-0.50364	3.71214e-15
LPC(18:2)	HMDB0010386	Lipid	-0.932593	6.13615e-24	-1.12465	4.6898e-24	-1.02862	8.99843e-27
LPC(16:1)	HMDB0010383	Lipid	-0.676286	3.67251e-15	-0.621975	6.16221e-11	-0.64913	4.80212e-22
LPC(14:0)	HMDB0010379	Lipid	-0.879808	9.31863e-23	-0.686002	9.07076e-13	-0.782905	6.51651e-16
LPC(18:3)	HMDB0010387	Lipid	-1.05217	3.72593e-26	-1.02057	2.05096e-20	-1.03637	2.38268e-40
LPC(18:1)	HMDB0002815	Lipid	-0.767028	3.83316e-17	-0.765022	5.11543e-14	-0.766025	1.54118e-26
LPC(20:5)	HMDB0010397	Lipid	-0.498463	1.71823e-09	-0.358897	2.14738e-05	-0.42868	8.09409e-10
PC(34:3)	HMDB0008006	Lipid	-0.349591	5.46843e-06	-0.34511	6.60745e-05	-0.347351	1.35215e-08
PC(36:3)	HMDB0008105	Lipid	-0.301259	5.58981e-05	-0.450442	2.22993e-07	-0.37585	4.68525e-07
SM(d18:1/18:1)	HMDB0012101	Lipid	0.316351	8.56008e-05	0.202818	0.0229016	0.259585	3.82238e-05
TG(48:4)	HMDB0042811	Lipid	-1.16243	2.95975e-33	-0.996583	6.01476e-22	-1.07951	9.68266e-39
TG(50:4)	HMDB0005435	Lipid	-0.900161	1.26162e-25	-0.623895	6.53568e-13	-0.762028	3.45555e-08
TG(54:7)	HMDB0005447	Lipid	-0.535751	2.09489e-09	-0.351141	7.72929e-05	-0.443446	1.55422e-06
TG(48:3)	HMDB0005432	Lipid	-1.09018	9.7876e-32	-0.87445	9.73421e-20	-0.982314	8.47002e-20
TG(55:2)	HMDB0042226	Lipid	-1.24688	9.63798e-33	-1.28511	3.77638e-28	-1.266	5.09137e-53
CE(20:5)	HMDB0006731	Lipid	0.630508	5.15918e-13	0.556257	3.15946e-09	0.593382	4.05056e-19
3-hydroxyhexanoate		Lipid	1.24567	6.30057e-35	0.917562	2.6374e-21	1.08162	4.30999e-11
phenyllactate	HMDB0000779	Amino Acid	-0.513425	2.18498e-09	-0.42223	1.38313e-05	-0.467828	9.71035e-12
3-hydroxyoctanoate	HMDB0001954	Lipid	0.692048	6.04561e-17	0.598287	3.54211e-11	0.645168	5.59019e-24
glycoursodeoxycholate	HMDB0000708	Lipid	-0.961241	4.36865e-25	-0.909425	8.37155e-20	-0.935333	4.63527e-40
glycocholate	HMDB0000138	Lipid	-1.12622	2.45243e-32	-1.32826	3.98027e-32	-1.22724	5.81317e-34
3-hydroxydecanoate	HMDB0002203	Lipid	1.81871	1.38502e-46	1.79907	1.25347e-38	1.80889	2.855e-76
taurochenodeoxycholate	HMDB0000951	Lipid	-0.973019	1.77368e-26	-1.31378	1.13944e-30	-1.1434	1.93594e-11
cholate	HMDB0000619	Lipid	-0.576652	2.08074e-11	-0.629835	6.51307e-11	-0.603244	8.99823e-19
glycochenodeoxycholate	HMDB0000637	Lipid	-1.20481	1.18961e-35	-1.42852	2.6006e-35	-1.31666	5.50559e-32
tetradecanedioate	HMDB0000872	Lipid	0.807878	9.82058e-23	0.687851	4.46293e-16	0.747865	1.20832e-35
glycodeoxycholate	HMDB0000631	Lipid	-1.00926	1.10353e-30	-0.791743	1.46481e-18	-0.900503	1.2346e-16
chenodeoxycholate	HMDB0000518	Lipid	-0.404838	9.06955e-07	-0.337788	6.09515e-05	-0.371313	4.59245e-10
glycolithocholate	HMDB0000698	Lipid	-0.760855	5.42644e-22	-0.854264	1.45811e-21	-0.807559	3.07297e-37
caprate	HMDB0000511	Lipid	0.230938	0.00170197	0.36067	1.03485e-05	0.295804	5.10968e-06
16-hydroxypalmitate	HMDB0006294	Lipid	1.34764	3.13674e-41	1.30001	1.0087e-33	1.32382	4.80955e-68
5-dodecenoate	HMDB0000529	Lipid	2.75316	1.45391e-49	3.25689	1.817e-40	3.00503	8.15309e-33
dodecanoate	HMDB0000638	Lipid	0.869193	5.49056e-25	1.18213	1.64776e-28	1.02566	5.56156e-11
myristoleate	HMDB0002000	Lipid	1.90577	4.11593e-46	2.55457	7.6222e-42	2.23017	6.21115e-12
alpha-linolenate	HMDB0001388	Lipid	1.43262	5.72988e-41	1.79609	4.85373e-38	1.61436	6.50831e-19
2-hydroxyhexadecanoate		Lipid	0.85837	1.21362e-20	1.13772	7.6208e-26	0.998044	8.9669e-13
myristate	HMDB0000806	Lipid	1.42595	2.13251e-41	1.90446	6.62307e-42	1.66521	3.40589e-12
docosahexaenoate	HMDB0002183	Lipid	1.34492	9.68757e-38	1.45366	1.07673e-34	1.39929	8.58689e-63
palmitoleate	HMDB0003229	Lipid	2.44146	1.24931e-51	2.67293	1.81748e-43	2.5572	4.58592e-78
docosapentaenoate	HMDB0001976	Lipid	1.26124	1.02348e-36	1.84758	3.19586e-41	1.55441	1.14521e-07
linoleate	HMDB0000673	Lipid	2.0157	1.70747e-48	2.49007	2.56126e-41	2.25288	2.12967e-21
pentadecanoate	HMDB0000826	Lipid	1.19869	1.79294e-36	1.74055	3.19381e-41	1.46962	5.81887e-08
10-heptadecenoate	HMDB0060038	Lipid	2.21715	3.2091e-51	2.68407	4.09748e-42	2.45061	8.93256e-26
adrenate	HMDB0002226	Lipid	1.03838	1.53687e-29	1.694	1.76185e-38	1.36619	3.07837e-05
palmitate	HMDB0000220	Lipid	1.74261	4.35985e-47	2.23004	1.13602e-42	1.98632	3.63505e-16
oleate	HMDB0000207	Lipid	2.20739	2.90808e-51	2.77227	1.39721e-41	2.48983	1.19273e-18
eicosadienoate	HMDB0005060	Lipid	1.68062	4.80247e-44	2.45559	4.97254e-41	2.06811	9.4367e-08
10-nonadecenoate	HMDB0013622	Lipid	2.08663	2.2289e-50	3.01294	8.97259e-41	2.54978	3.68595e-08
nervonic acid	HMDB0002368	Lipid	1.12617	2.51781e-30	1.01835	1.7059e-23	1.07226	4.84749e-50
dodecanedioate	HMDB0000623	Lipid	0.316351	8.56008e-05	0.202818	0.0229016	0.259585	3.82238e-05
arachidate	HMDB0002212	Lipid	-1.16243	2.95975e-33	-0.996583	6.01476e-22	-1.07951	9.68266e-39
13-docosenoate	HMDB0002068	Lipid	-0.900161	1.26162e-25	-0.623895	6.53568e-13	-0.762028	3.45555e-08
taurodeoxycholate	HMDB0000896	Lipid	-0.535751	2.09489e-09	-0.351141	7.72929e-05	-0.443446	1.55422e-06
taurohyodeoxycholate/tauroursodeoxycholate	HMDB0000874	Lipid	-1.09018	9.7876e-32	-0.87445	9.73421e-20	-0.982314	8.47002e-20
tauro-alpha-muricholate/tauro-beta-muricholate	HMDB0000932	Lipid	-1.24688	9.63798e-33	-1.28511	3.77638e-28	-1.266	5.09137e-53
theophylline	HMDB0001889	Xenobiotics	0.630508	5.15918e-13	0.556257	3.15946e-09	0.593382	4.05056e-19
4-hydroxystyrene	HMDB0004072	Xenobiotics	-0.529368	5.85073e-10	-0.363026	6.85296e-05	-0.446197	8.10271e-08
palmitoylethanolamide	HMDB0002100	Lipid	0.896266	4.25427e-24	1.19706	7.76651e-22	1.04666	3.42083e-12
p-hydroxyphenylacetate	HMDB0000020	Amino Acid	-0.360547	9.04428e-05	-0.379802	4.68361e-05	-0.370174	2.00979e-08
ribothymidine	HMDB0000884	Nucleotide	0.269581	0.00533102	0.265941	0.00167703	0.267761	7.6733e-06
cortisone	HMDB0002802	Lipid	0.27769	0.000384039	0.25327	0.00490174	0.26548	3.03813e-05
linoleoyl ethanolamide	HMDB0012252	Lipid	0.874004	1.8627e-23	0.84902	2.49665e-15	0.861512	6.88798e-30
DG(34:1)	HMDB0007102	Lipid	-0.657203	9.5746e-15	-0.602842	8.27919e-11	-0.630022	7.98616e-22
metronidazole	HMDB0015052	Xenobiotics	-0.62122	3.08752e-15	-0.609735	8.20654e-12	-0.615477	1.72112e-22
glycodeoxycholate/glycochenodeoxycholate	HMDB0000631	Lipid	-1.34654	4.87892e-37	-1.4684	8.48019e-34	-1.40747	1.23893e-60
PE(38:4)	HMDB0009003	Lipid	-0.284986	0.000257999	-0.314903	0.000143634	-0.299944	3.03611e-07
PE(36:4)	HMDB0008937	Lipid	-0.554708	1.46641e-11	-0.647844	1.78717e-12	-0.601276	2.16788e-20
PE(34:2)	HMDB0008928	Lipid	-0.841192	3.49411e-22	-0.969067	1.04651e-22	-0.90513	2.2121e-38
LPE(18:0)_A	HMDB0011130	Lipid	-0.876976	6.01339e-22	-1.02046	6.69428e-22	-0.948718	1.17719e-36
LPE(18:1)	HMDB0011506	Lipid	-1.25414	8.81379e-35	-1.3746	3.70346e-31	-1.31437	1.55157e-55
LPE(18:2)	HMDB0011507	Lipid	-1.07618	4.22888e-31	-1.17749	9.24969e-28	-1.12684	2.00539e-49
LPE(18:3)	HMDB0011478	Lipid	1.24416	1.01543e-22	1.23727	7.69965e-19	1.24071	3.05181e-36
C18:1 carnitine	HMDB0005065	Lipid	0.457317	1.66583e-09	0.56853	3.00937e-10	0.512924	9.28548e-16
PC(36:2)	HMDB0008039	Lipid	-0.437407	2.23797e-08	-0.503629	1.80513e-08	-0.470518	1.02083e-13
PC(30:0)	HMDB0007869	Lipid	-0.406932	4.04023e-07	-0.351142	5.46442e-05	-0.379037	7.30235e-10
C14 carnitine	HMDB0005066	Lipid	0.522354	2.86968e-11	0.862608	1.87179e-18	0.692481	4.69387e-05
methionine	HMDB0000696	Amino Acid	-0.410477	1.88627e-07	-0.251248	0.00156074	-0.330862	3.2416e-05
C12:1 carnitine	HMDB0013326	Lipid	2.41276	1.21688e-45	1.8791	5.24951e-35	2.14593	8.81879e-16
SM(d18:1/18:0)	HMDB0001348	Lipid	0.25125	0.00156531	0.24792	0.00445456	0.249585	5.14177e-05
C8 carnitine	HMDB0000791	Lipid	2.17186	3.11068e-44	1.76865	6.54355e-35	1.97025	1.47306e-22
LPC(20:1)	HMDB0010391	Lipid	-0.563153	1.41704e-10	-0.417513	7.27016e-06	-0.490333	1.65658e-11
LPC(P-16:0)/LPC(O-16:1)	HMDB0010407	Lipid	-0.559711	4.85671e-11	-0.35451	5.6475e-05	-0.457111	8.37961e-06
LPC(22:6)	HMDB0010404	Lipid	-1.57244	2.49464e-38	-1.50741	6.08337e-30	-1.53993	1.31896e-60
LPC(18:0)	HMDB0010384	Lipid	-0.730136	4.6395e-17	-0.627211	3.72343e-11	-0.678674	4.40768e-24
LPC(20:3)	HMDB0010393	Lipid	-0.682241	1.95056e-16	-0.646934	6.35531e-13	-0.664588	1.47322e-25
LPC(20:4)	HMDB0010395	Lipid	-1.42344	5.84184e-38	-1.38928	2.40024e-31	-1.40636	2.07294e-62
LPE(20:0)	HMDB0011511	Lipid	-0.657265	2.47527e-15	-0.438867	1.58219e-06	-0.548066	5.19499e-07
LPC(20:5)	HMDB0010397	Lipid	-0.726157	4.74296e-18	-0.991447	9.97885e-22	-0.858802	9.51544e-11
LPE(20:1)	HMDB0011512	Lipid	-0.483894	1.47225e-10	-0.433477	5.1798e-07	-0.458686	5.84502e-14
LPC(18:3)	HMDB0010387	Lipid	-0.540858	3.1417e-13	-0.588688	2.48875e-11	-0.564773	1.36484e-19
glycine	HMDB0000123	Amino Acid	-0.557118	1.02827e-10	-0.357214	0.000105272	-0.457166	4.78805e-06
1-methylnicotinamide	HMDB0000699	Cofactors and Vitamins	-1.04535	1.49948e-28	-0.735795	4.34835e-15	-0.890574	8.72215e-09
choline	HMDB0000097	Lipid	-0.340961	1.60809e-05	-0.50852	2.16191e-08	-0.424741	3.98339e-07
creatine	HMDB0000064	Amino Acid	-0.232674	0.00268229	-0.295621	0.000798437	-0.264148	2.26088e-05
C2 carnitine	HMDB0000201	Lipid	1.15952	4.87749e-31	1.23189	8.86547e-29	1.1957	1.05237e-52
cystine	HMDB0000192	Amino Acid	-1.02402	5.59623e-28	-1.04322	3.89787e-25	-1.03362	1.01737e-47
histidine	HMDB0000177	Amino Acid	-0.595831	1.22734e-12	-0.371124	9.37082e-06	-0.483478	1.68365e-05
thiamine	HMDB0000235	Cofactors and Vitamins	-0.660656	1.40794e-14	-0.70291	7.2116e-13	-0.681783	7.38542e-23
alpha-glycerophosphocholine	HMDB0000086	Lipid	-0.568015	1.1864e-10	-0.544299	6.74001e-08	-0.556157	6.18164e-15
anserine	HMDB0000194	Peptide	-0.413391	1.41181e-07	-0.471074	2.15098e-08	-0.442233	1.05423e-13
lysine	HMDB0000182	Amino Acid	-0.502494	3.54141e-10	-0.317202	0.000138051	-0.409848	9.69812e-06
arginine	HMDB0000517	Amino Acid	-0.235302	0.00179539	-0.235146	0.00375522	-0.235224	4.13531e-05
betaine	HMDB0000043	Amino Acid	-0.427111	7.40977e-08	-0.416145	2.02545e-06	-0.421628	9.94736e-12
C4-OH carnitine	HMDB0013127	Lipid	1.51655	6.08027e-42	1.3556	2.24953e-30	1.43608	5.31374e-66
N-methylproline		Amino Acid	-0.262451	0.00156802	-0.289384	0.00100028	-0.275918	9.12826e-06
C3-DC-CH3 carnitine	HMDB0013133	Lipid	-0.341388	4.43612e-05	-0.440384	1.78992e-06	-0.390886	2.03649e-09
N6-acetyllysine	HMDB0000206	Amino Acid	-0.340629	3.89537e-05	-0.567889	1.17124e-09	-0.454259	6.39625e-05
N-alpha-acetylarginine	HMDB0004620	Amino Acid	-0.312432	2.63388e-05	-0.358417	2.27267e-05	-0.335425	2.06272e-08
proline	HMDB0000162	Amino Acid	-1.23366	7.60035e-33	-1.31434	4.68372e-29	-1.274	4.38268e-53
LPC(14:0)	HMDB0010379	Lipid	-0.863717	1.58122e-22	-0.594328	2.25685e-11	-0.729022	6.21817e-08
LPE(18:0)_B	HMDB0011130	Lipid	-0.66394	4.67946e-16	-0.459305	1.40564e-07	-0.561623	4.0417e-08
LPC(16:1)	HMDB0010383	Lipid	-0.595482	6.34633e-13	-0.509037	3.48934e-09	-0.552259	1.27272e-19
hydroxyproline	HMDB0000725	Amino Acid	-0.303432	0.000135531	-0.230599	0.00817031	-0.267016	1.48273e-05
LPC(16:0)	HMDB0010382	Lipid	-0.784906	4.07377e-19	-0.694432	3.52483e-13	-0.739669	6.28149e-28
alanine	HMDB0000161	Amino Acid	-1.40866	3.56486e-40	-1.47766	4.3045e-33	-1.44316	1.53867e-61
LPC(22:5)	HMDB0010403	Lipid	-0.42321	1.4307e-07	-0.297548	0.0005048	-0.360379	9.7127e-09
LPC(22:4)	HMDB0010401	Lipid	-0.47334	4.81398e-09	-0.345639	6.75829e-05	-0.40949	1.42453e-10
1-methyladenosine	HMDB0003331	Nucleotide	0.394214	5.9456e-06	0.562388	1.96165e-08	0.478301	1.284e-08
C6 carnitine	HMDB0000705	Lipid	2.1653	3.51433e-42	1.91136	3.38067e-33	2.03833	5.40858e-58
C7 carnitine	HMDB0013238	Lipid	1.19128	6.74271e-24	1.13123	3.95516e-20	1.16125	1.34453e-40
C10 carnitine	HMDB0000651	Lipid	2.06859	1.45132e-43	1.86621	5.00881e-36	1.9674	6.75396e-78
C12 carnitine	HMDB0002250	Lipid	1.91057	1.81125e-44	1.5949	3.71164e-32	1.75273	1.18846e-28
C14:2 carnitine	HMDB0013331	Lipid	1.90822	4.12188e-48	1.80578	2.80681e-39	1.857	4.54768e-81
C14:1 carnitine	HMDB0002014	Lipid	2.14739	5.97506e-47	1.906	7.32358e-39	2.0267	2.78057e-63
LPE(16:0)	HMDB0011503	Lipid	-1.1492	9.2531e-32	-1.19294	3.07696e-27	-1.17107	6.52717e-51
LPE(20:4)	HMDB0011517	Lipid	-0.536919	1.16455e-11	-0.519779	2.28632e-09	-0.528349	8.64164e-18
acisoga	HMDB0061384	Amino Acid	0.430965	7.03885e-08	0.43234	8.42203e-07	0.431652	3.54103e-12
PE(36:2)	HMDB0008994	Lipid	-1.2891	3.57283e-36	-1.387	8.74959e-33	-1.33805	1.62256e-59
PE(40:6)	HMDB0009012	Lipid	-0.381856	4.51957e-06	-0.275759	0.00148853	-0.328807	8.45535e-08
glycocholate	HMDB0000138	Lipid	-1.11105	2.02487e-31	-1.25239	7.45664e-30	-1.18172	8.17671e-52
2-aminoisobutyric acid	HMDB0001906	Amino Acid	0.444086	1.94814e-08	0.407608	1.99706e-06	0.425847	2.16234e-12
DMGV	HMDB0240212	Nucleotide	0.316351	8.56008e-05	0.202818	0.0229016	0.259585	3.82238e-05
leucine	HMDB0000687	Amino Acid	-1.16243	2.95975e-33	-0.996583	6.01476e-22	-1.07951	9.68266e-39
N-carbamoyl-beta-alanine	HMDB0000026	Nucleotide	-0.900161	1.26162e-25	-0.623895	6.53568e-13	-0.762028	3.45555e-08
phosphocholine	HMDB0001565	Lipid	-0.535751	2.09489e-09	-0.351141	7.72929e-05	-0.443446	1.55422e-06
SDMA	HMDB0003334	Amino Acid	-1.09018	9.7876e-32	-0.87445	9.73421e-20	-0.982314	8.47002e-20
tryptophan	HMDB0000929	Amino Acid	-1.24688	9.63798e-33	-1.28511	3.77638e-28	-1.266	5.09137e-53
xanthosine	HMDB0000299	Nucleotide	0.630508	5.15918e-13	0.556257	3.15946e-09	0.593382	4.05056e-19
allantoin	HMDB0000462	Nucleotide	-0.708066	1.80573e-19	-0.858748	9.25794e-20	-0.783407	2.52862e-25
asparagine	HMDB0000168	Amino Acid	-0.766042	2.88865e-18	-0.663404	4.42867e-12	-0.714723	5.20873e-26
aspartate	HMDB0000191	Amino Acid	-0.293956	0.00011233	-0.277937	0.00137075	-0.285946	3.20894e-06
SM(d18:1/18:1)	HMDB0012101	Lipid	0.276043	0.000558596	0.277405	0.00150507	0.276724	7.56012e-06
LPC(18:2)	HMDB0010386	Lipid	-0.899584	3.19852e-23	-1.05108	4.66684e-23	-0.975334	6.17095e-38
